# Supplementary material for: Protocol study for a randomised, controlled, double-blind, clinical trial involving virtual reality and anodal transcranial direct current stimulation for the improvement of upper limb motor function in children with Down syndrome
Source: PubMed Central journal article supplement — BMJ Open. 2017 Aug 11;7(8):e016260. doi: 10.1136/bmjopen-2017-016260 (PMC5629662; doi:10.1136/bmjopen-2017-016260), 2017-08-11
Supplement: bmjopen-2017-016260.draft_revisions.pdf [file bmjopen-2017-016260.draft_revisions.pdf]

# BMJ Open

BMJ Open is committed to open peer review. As part of this commitment we make the peer review history of every article we publish publicly available.

When an article is published we post the peer reviewers' comments and the authors' responses online. We also post the versions of the paper that were used during peer review. These are the versions that the peer review comments apply to.

The versions of the paper that follow are the versions that were submitted during the peer review process. They are not the versions of record or the final published versions. They should not be cited or distributed as the published version of this manuscript.

BMJ Open is an open access journal and the full, final, typeset and author-corrected version of record of the manuscript is available on our site with no access controls, subscription charges or pay-per-view fees (<http://bmjopen.bmj.com>).

If you have any questions on BMJ Open's open peer review process please email [info.bmjopen@bmj.com](mailto:info.bmjopen@bmj.com)

# BMJ Open

**Protocol study for a randomized, controlled, double-blind, clinical trial involving virtual reality and anodal transcranial direct current stimulation for the improvement of upper limb motor function in children with Down syndrome**

|                                 |                                                                                                                                                                                                                                                                                                                                                                                                                                                                                                                                                                                         |
|---------------------------------|-----------------------------------------------------------------------------------------------------------------------------------------------------------------------------------------------------------------------------------------------------------------------------------------------------------------------------------------------------------------------------------------------------------------------------------------------------------------------------------------------------------------------------------------------------------------------------------------|
| Journal:                        | <i>BMJ Open</i>                                                                                                                                                                                                                                                                                                                                                                                                                                                                                                                                                                         |
| Manuscript ID                   | bmjopen-2017-016260                                                                                                                                                                                                                                                                                                                                                                                                                                                                                                                                                                     |
| Article Type:                   | Protocol                                                                                                                                                                                                                                                                                                                                                                                                                                                                                                                                                                                |
| Date Submitted by the Author:   | 07-Feb-2017                                                                                                                                                                                                                                                                                                                                                                                                                                                                                                                                                                             |
| Complete List of Authors:       | Lopes, Jamile; Universidade Nove de Julho, Grecco, Luanda<br>Moura, Renata; Universidade Nove de Julho<br>Lazzari, Roberta; Universidade Nove de Julho, Movement Analysis Lab<br>Duarte, Natalia<br>Miziara, Isabela ; Universidade Federal de Uberlandia, ucleus of Assistive Technologies (NTA) and Biomedical Engineering Laboratory (Biolab)<br>melo, Gileno Edu; Universidade do Estado do Para, Desporto; Universidade Nove de Julho,<br>Dumont, Arislander; Universidade Nove de Julho<br>Galli, Manuela; Politecnico di Milano,<br>Santos Oliveira, C; Nove de Julho University |
| <b>Primary Subject Heading</b>: | Neurology                                                                                                                                                                                                                                                                                                                                                                                                                                                                                                                                                                               |
| Secondary Subject Heading:      | Global health                                                                                                                                                                                                                                                                                                                                                                                                                                                                                                                                                                           |
| Keywords:                       | Down syndrome, transcranial direct current stimulation, upper limb.                                                                                                                                                                                                                                                                                                                                                                                                                                                                                                                     |
|                                 |                                                                                                                                                                                                                                                                                                                                                                                                                                                                                                                                                                                         |

SCHOLARONE™  
Manuscripts

1  
2  
3  
4  
5  
6  
7  
8  
9  
10  
11  
12  
13  
14  
15  
16  
17  
18  
19  
20  
21  
22  
23  
24  
25  
26  
27  
28  
29  
30  
31  
32  
33  
34  
35  
36  
37  
38  
39  
40  
41  
42  
43  
44  
45  
46  
47  
48  
49  
50  
51  
52  
53  
54  
55  
56  
57  
58  
59  
60

**Protocol study for a randomized, controlled, double-blind, clinical trial involving virtual reality and anodal transcranial direct current stimulation for the improvement of upper limb motor function in children with Down syndrome**

Jamile Benite Palma Lopes<sup>1</sup>, Luanda André Collange Grecco<sup>2</sup>, Renata Calhes Franco de Moura<sup>1</sup>, Roberta Delasta Lazzari<sup>1</sup>, Natalia de Almeida Carvalho Duarte<sup>1</sup>, Isabela Mizziara<sup>3</sup>, Gileno Edu Lameira de Melo<sup>1</sup>, Arislander Jonathan Lopes Dumont<sup>1</sup>, Manuela Galli<sup>4</sup>, Claudia Santos Oliveira<sup>5</sup>

<sup>1</sup> Doctoral and Master Programs in Rehabilitation Sciences, Movement Analysis Lab, University Nove de Julho, Avenue Francisco Matarazzo, 612. 05001-000. São Paulo, São Paulo, Brazil. Email: [jamilepalma@yahoo.com.br](mailto:jamilepalma@yahoo.com.br), [robertalazzari@hotmail.com](mailto:robertalazzari@hotmail.com), [natycarvalho\\_fisio@hotmail.com](mailto:natycarvalho_fisio@hotmail.com), [gilenouepa@yahoo.com.br](mailto:gilenouepa@yahoo.com.br), [arislanderlg@gmail.com](mailto:arislanderlg@gmail.com) [franco.renata@terra.com.br](mailto:franco.renata@terra.com.br),

<sup>2</sup> Center of Pediatric Neurosurgery - CENEPE-Rehabilitation, Avenue Dr. Veiga Filho, 350.Cj 604. 01229-001. São Paulo - SP, Brazil and Post Doctoral student, NANI – Educação e Saúde na Infância e Adolescência, Unifesp, São Paulo - SP, Brazil. (+55 11 2528-2893). Email: [luandacollange@hotmail.com](mailto:luandacollange@hotmail.com)

<sup>3</sup> Doctoral Postgraduate Program in Electrical Engineering, Nucleus of Assistive Technologies (NTA) and Biomedical Engineering Laboratory (Biolab), Faculty of Electrical Engineering, Federal University of Uberlândia, UFU, Uberlândia - MG, Brazil [isabelammiziara@gmail.com](mailto:isabelammiziara@gmail.com)

<sup>4</sup> Department of Electronic Information and Bioengineering, Politecnico di Milano, Milan, Italy and IRCCS San Raffaele Pisana, Rome, Italy. Via Giuseppe Colombo, 40, 20133, Italy (+39 0223993338). Email: [manuela.galli@polimi.it](mailto:manuela.galli@polimi.it)

<sup>5</sup> Professor, Master and Doctoral Programs in Rehabilitation Sciences, Movement Analysis Lab, University Nove de Julho, Avenida Francisco Matarazzo, 612. 05001-000. São Paulo, São Paulo, Brazil. Email: [csantos@uninove.br](mailto:csantos@uninove.br)

**Authors' contributions**

All authors made substantial contributions.

Conceived and designed the experiments: JL LG RC HL ND IM GM AD MG CO. Acquisition of data: JL LG RC HL ND IM GM AD MG CO. Interpretation of data: JL LG RC HL ND IM GM AD MG CO. Contributed analysis tools: JL LG RC HL ND IM GM AD MG CO. Wrote the paper: JL LG RC HL ND IM GM AD MG CO. Final approval of the version: JL LG RC HL ND IM GM AD MG CO

For peer review only - <http://bmjopen.bmj.com/site/about/guidelines.xhtml>

**Corresponding author:**

Cláudia Santos Oliveira

Address: Rua Itapicuru, 380. Apto:111.

Perdizes. CEP: 05006-000, São Paulo, Brazil

The study received approval from the ethics committee of University Nove de Julho (Sao Paulo, Brazil) under protocol number 1.540.113 and is registered with the Brazilian Registry of Clinical Trials (RBR3PHPXB)

**The authors declare that there are no additional unpublished data from the study.**

**Word count: 5600**

## Abstract

**Introduction:** Down syndrome results in neuromotor impairment that affects selective motor control, compromising the acquisition of motor skills and functional independence,. The aim of the proposed study is to evaluate and compare the effects of anodal transcranial direct current stimulation and sham stimulation over the primary motor cortex during upper limb motor training involving virtual reality on motor control, muscle activity, cerebral activity, and functional independence.**Methods and Analysis:**A randomized, controlled, double-blind, clinical trial. The calculation of the sample size will be defined based on the results of a pilot study involving the same methods. The participants will be randomly allocated to two groups. Evaluations will be conducted prior, after and one month after the end of the intervention process. At each evaluation, three-dimensional analysis of upper limb movement will be performed with the SMART-D 140® system (BTS Milan, Italy) following the *SMARTup* protocol, will be measured using electromyography (FREEEMG®BTS), cerebral activity will be measured using an electroencephalogram system (BrainNet), and intellectual capacity will be assessed using the Wechsler Intelligence Scale for Children . Virtual reality training will be held three times per week for a total of ten 20-minute sessions. Transcranial stimulation will be administered simultaneously to the training. The results will be analyzed statistically, with a p-value  $\leq 0.5$  considered indicative of statistical significance. **Ethical aspects and publicity:**The present study received approval from the Institutional Review Board of *Universidade Nove de Julho* (Sao Paulo,Brazil) under process number 1.540.113 and is registered with the Brazilian Registry of Clinical Trials (N° RBR3PHPXB).The participating institutions have presented a declaration of participation. The volunteers will be permitted to drop out of the study at any time with no negative repercussions. The results will be published and will contribute evidence regarding the use of this type of intervention on children with Down syndrome.

**Keywords:** Down syndrome; transcranial direct current stimulation; upper limb.

### Strengths and limitations of this study

1. The proposed project involves the combination of virtual reality activities for upper limb motor training and anodal transcranial direct current stimulation over the primary motor cortex with the aim of optimizing motor control and function of the upper limbs in children with Down syndrome (DS).
2. Adequate upper limb motor control enables individuals to perform daily, functional, and academic activities in an independent fashion.
3. The use of virtual reality(VR) activities to improve motor control is a promising therapeutic resource that has demonstrated satisfactory results in the scientific literature, including for individuals with DS.
4. Non-invasive brain stimulation techniques, specifically anodal transcranial direct current stimulation, are currently considered effective means by which to facilitate motor cortical excitability of brain regions underlying the stimulation electrode, leading to improvements in motor control and motor learning. Despite the lack of reports on the effects of transcranial stimulation in children with DS, studies involving pediatric patients have demonstrated that the technique is safe, with little or no adverse effects.
5. We believe that the administration of anodal transcranial direct current stimulation over the primary motor cortex, specifically the areas that correspond to upper limb motor control (C3 and C4 of the 10-20 electroencephalogram system), during upper limb motor training with the use of virtual reality activities will enhance the cortical excitability of motor regions and optimize cerebral activity, thereby potentiating the effects of upper limb motor therapy.

## 1. INTRODUCTION

Down syndrome (DS) is a highly prevalent genetic disease caused by the inheritance of an additional chromosome 21 and is one of the most frequent causes of mental impairment, affecting approximately 20% of the total number of individuals with mental disability.<sup>[1]</sup> The incidence in the United States is one out of every 700 births and it is estimated that at least 100 thousand individuals in Brazil are diagnosed with the syndrome.<sup>[2-4]</sup>

The nervous system of children with DS exhibits structural and functional abnormalities. Diffuse brain damage and peculiar electrical functioning during cognitive development result in poor analysis, synthesis, and speech skills. Moreover, such children demonstrate difficulties in selecting and directing a stimulus due to the fatigue of the connections. These abnormalities result in neurological disorders that vary in terms of manifestation and intensity.<sup>[5]</sup>

According to Flórez and Troncoso (1997),<sup>[6-7]</sup> the brain of an individual with DS is smaller in volume in comparison to an individual without this condition. Hypoplasia of the frontal and occipital lobes is a common finding. A unilateral or bilateral reduction in the temporal lobe is found in up to 50% of cases and reductions in the corpus callosum, anterior commissure, and hippocampus are found. According to Bomono & Rosetti (2010), the neuromotor abnormalities in DS include hypotonia, diminished primitive reflexes, delayed motor and cognitive development, and lower levels of learning.<sup>[8]</sup>

Studies have been conducted to understand why individuals with DS have slow, unharmonious movements.<sup>[10-22]</sup> The investigation of electromyographic activity and muscle torque demonstrates this deficiency, which can be corrected by the repetition of a given movement during motor training activities. Motor control strategies used in the execution of complex activities, such as a reaching task, have been investigated in this population.<sup>[13,17-22]</sup>

The optimal results achieved with virtual reality are believed to be related to training in an interactive environment that provides a broad range of activities and scenarios with multiple sensory channels, allowing the creation of exercises at an intensity that is promising for the needs of individuals with DS.<sup>[23-26]</sup> Virtual reality (VR) can be used as an auxiliary tool involving a playful, motivational objective that can facilitate the development of perception and motor skills, with the training of planning skills and motor control as well as the stimulation of the plasticity of the central nervous system.

Non-invasive brain stimulation methods have been employed in physical rehabilitation protocols due to the promising results achieved with regard to motor learning. Transcranial

1  
2  
3  
4  
5  
6  
7  
8  
9  
10  
11  
12  
13  
14  
15  
16  
17  
18  
19  
20  
21  
22  
23  
24  
25  
26  
27  
28  
29  
30  
31  
32  
33  
34  
35  
36  
37  
38  
39  
40  
41  
42  
43  
44  
45  
46  
47  
48  
49  
50  
51  
52  
53  
54  
55  
56  
57  
58  
59  
60

direct current stimulation (TDCS) is a relatively low-cost, noninvasive brain stimulation technique that is easy to administer and offers minimal adverse effects. This method is known to produce lasting changes in motor cortical excitability [27]. Cortical modulation depends on the polarity of the current: anodal stimulation increases cortical excitability, favoring the depolarization of the neuronal membrane, whereas cathodal stimulation has an inhibitory effect due to the hyperpolarization of the neuronal membrane. [28,33]

TDCS has advantages over other transcranial stimulation techniques, such as providing a longer lasting modulatory effect on cortical function as well as its ease of use and lower cost. The results of clinical trials have demonstrated its considerable potential in the treatment of neurological disorders and the investigation of processes of cortical excitability modulation. Moreover, this type of intervention offers a better condition for sham stimulation, which confers greater specificity to the findings. [34] In the rehabilitation process, the aim of neuromodulating techniques is to enhance local synaptic efficiency and alter the maladaptive plasticity pattern that emerges after a cortical injury. [35-39].

Although DS is one of the most prevalent diseases in the pediatric population, no studies were found on the effects of TDCS in children with this syndrome. Thus, the lack of investigations on anodal TDCS over the primary motor cortex during motor training for children with DS constitutes a gap in the scientific literature. [40] Considering the high prevalence of DS, the motor limitations stemming from this disease, which exert a negative impact on functionality and independence, and the fact that TDCS is not contraindicated in most cases of this syndrome, the investigation of the effects of this noninvasive brain stimulation technique on children with DS is relevant. [38-39]

The proposed study could be used as the basis for the development of further projects conducted to broaden knowledge on this technique, enabling a novel intervention option for the optimization of motor control in individuals with DS.



## 2. OBJECTIVES

### 2.1 Primary objective

The aim of the proposed study is to evaluate and compare the effect of TDCS and sham stimulation over the primary motor cortex during upper limb motor training involving virtual reality on motor control (spatiotemporal variables and kinematics of a reaching task), activity of the elbow flexors and extensors, cerebral activity and functional independence in children with DS.

### 2.2 Secondary objectives

- Determine possible correlations between upper limb motor control (movement velocity and total duration of movement) and muscle activity (elbow flexors and extensors), cerebral activity (activity of the parietal lobe, specifically regions C3 and C4) and functional independence with regard to self-care.

- Identify possible prediction factors for the response of upper limb motor control (movement velocity and total duration of movement) in children with Down syndrome. The factors will be investigated: muscle activity of elbow flexors and extensors, cerebral activity (areas C3 and C4 of the 10-20 electroencephalogram system) and transcranial direct current stimulation (active and sham).

## 3. METHODS AND ANALYSIS

The following will be the inclusion criteria: 1) a diagnosis of DS; 2) adequate comprehension and cooperation during the procedures; 3) age six to 12 years; (4) compromised upper limb motor coordination; and 5) statement of informed consent signed by a legal guardian. The exclusion criteria will be 1) having undergone surgical procedures in the 12 months prior to the onset of the training sessions, 2) orthopedic deformity of the lower limbs or spinal column with an indication for surgery, 3) epilepsy, 4) metal implant in skull or hearing aids, 5) associated neurological disorder, and 6) use of a pacemaker.

### 3.1 Study Design

A Phase I-II study will be conducted: analytical, paired, randomized, controlled, double-blind, clinical trial

**Figure 1:** Flowchart of study following CONSORT statement

### 3.2 Sample size

The sample size will be calculated based on the results of a pilot study with the same methods as those of the main study. The pilot study will involve ten children randomly allocated to the experimental and control groups (five children in each group). The sample size will be calculated based on the mean of both groups considering total duration of movement as the primary outcome, with a unidirectional alpha of 0.05 and an 80% power. The sample will be increased by 20% to compensate for possible dropouts.

### 3.3 Randomization

Patients with DS who meet the eligibility criteria and agree to participate in the study will be submitted to an initial evaluation and will then be randomly allocated to two groups using a randomization method available on the site [www.randomizacion.com](http://www.randomizacion.com). This process will be performed by a member of the research team who is not involved in the recruitment or development of the study. Experimental group: anodal TDCS over the primary motor cortex bilaterally combined with upper limb motor training involving the use of VR; Control group: sham TDCS over the primary motor cortex bilaterally combined with upper limb motor training involving the use of VR.

### 3.4 Evaluations

The participants will be submitted to three evaluations: Pre-intervention, post-evaluation (after ten training sessions), and follow up (one month after last training session).

#### 3.4.1 Three-dimensional movement analysis:

Three-dimensional analysis of upper limb movement: the kinematics of upper limb movement will be evaluated using the SMART-D 140® system (BTS, Milan, Italy), with eight cameras sensitive to infrared light, a sampling frequency of 100 Hz and video system synchronized with the SMART-D system. Passive markers will be positioned at anatomic references points directly on the skin with specific adhesive tape, following the protocol of the *SMARTup: The experimental setup*.<sup>[40-42]</sup> A total of 18 markers measuring 15 mm in diameter will be used to identify the position of the head, trunk and upper limbs (upper arm, forearm and hand).

The movement will be divided into three phases: going phase (upper limb moving toward the target), adjusting phase (adjustment of arm to locate target precisely) and returning phase (return to initial position). At least six complete movements will be performed to obtain three adequate cycles for analysis. The biomechanical model filtering

of the data, and processing of the variables will be performed using the *SMART analyser* software program (BTS, Milan, Italy). The variables will be identified and calculated for each movement cycle to evaluate any changes that occur after the intervention. The following variables will be considered, with the mean of the results used in the statistical analyses:

- Total duration of movement: total time required to perform the complete reaching task.
- Mean movement velocity: computed during the going phase and determined using the marker positioned on the index finger.
- Adjusting sway index: Defined as the length of the three-dimensional path described by the marker on the index finger during the adjusting phase.
- Range of motion of elbow and shoulder: calculated as the difference between the maximum and minimum angles of the elbow and shoulder on the sagittal (elbow and shoulder) and frontal (shoulder) planes during the going phase, as described in the literature.<sup>[41,42]</sup>

**Figure 2:** Placement of markers for three-dimensional analysis using *SMARTup: The experimental setup*<sup>[40]</sup>

**Figure 3:** Phases of reaching cycle<sup>[40]</sup>

**3.4.2 Electromyographic (EMG) analysis:** Muscle activity during the reaching movement will be determined using EMG. The electrical activity resulting from the activation of the elbow flexors and extensors will be collected using an eight-channel electromyograph (FREEEMG<sup>®</sup>, BTS Engineering) with a bioelectrical signal amplifier, wireless data transmission and bipolar electrodes with a total gain of 2000 fold and frequency ranging from 20 to 450 Hz. Impedance and the common rejection mode ratio of the equipment are  $> 10^{15} \Omega/0.2 \text{ pF}$  and 60/10Hz 92 dB, respectively. The motor point of the muscles will be identified for the placement of the electrodes and the skin will be cleaned with 70% alcohol to reduce bioimpedance, following the recommendations of Surface Electromyography for the Non-Invasive Assessment of Muscles.<sup>[43]</sup> All EMG data will be digitized at 1000 frames per second using the BTS MYOLAB<sup>®</sup> software program. The data will be collected simultaneously to the kinematic data and both will be managed using the BTS<sup>®</sup> system and *Smart Capture*<sup>®</sup> software program.<sup>[44]</sup>

1  
2  
3  
4  
5  
6  
7  
8  
9  
10  
11  
12  
13  
14  
15  
16  
17  
18  
19  
20  
21  
22  
23  
24  
25  
26  
27  
28  
29  
30  
31  
32  
33  
34  
35  
36  
37  
38  
39  
40  
41  
42  
43  
44  
45  
46  
47  
48  
49  
50  
51  
52  
53  
54  
55  
56  
57  
58  
59  
60

**3.4.3 Electroencephalographic analysis:** Cerebral activity will be investigated using electroencephalography (EEG), which will be performed during both the three-dimensional analysis of the reaching task and the evaluation of muscle activation using EMG. For such, the volunteer will be seated in an erect position on a chair in front of the table on which the reaching task will be performed. The BrainNet BNT36 device with 36 configurable channels (32 AC and four DC) and a 16-bit analog-digital converter will be used for the acquisition of the EEG signal. The analysis of the signal will be performed with the aid of the EEGLab tool implemented on Matlab, which is also capable of furnishing a topographic map of cerebral activity as a function of time. The electrodes will be positioned following the guidelines of the 10/20 electroencephalogram system.<sup>[45,46]</sup>

**Figure 4** – Phase relationships. (A) synchronized signals – differences in phases between both signals are stable (constant); (B) non-synchronized signals – a differences in phases are variable<sup>[47]</sup>

**Figure 5** – Positioning of EEG electrodes following 10-20 standard<sup>[45]</sup>

**3.4.5 Pediatric Evaluation of Disability Inventory (PEDI):** The children's functional performance will be assessed quantitatively using the PEDI, which is a questionnaire administered in interview format to a caregiver who can provide information regarding the child's performance on typical activities and routine tasks. The PEDI is composed of three parts, the first of which is used to evaluate skills grouped into three functional domains: self-care (73 items), mobility (59 items) and social function (65 items). Each item is scored either zero (not part of the child's repertoire) or 1 (part of the child's repertoire). The scores are then summed per domain.<sup>[48,49]</sup>

**3.4.6 Wechsler Intelligence Scale for Children:** The Wechsler Intelligence Scale (WIS) was developed for the assessment of the intellectual performance of adults. The WISC was developed as a version for children, which was followed by the revised version, WISC-R. The WISC III is the third version of the scale for children and is used to assess intellectual capacity using 13 subtests, 12 of which were from earlier versions and one was new. The subtests are organized into two groups (verbal and perceptivo-motor or execution) and are administered in alternating order. The verbal subtests are Information, Similarities, Arithmetic, Vocabulary, Comprehension and Digits. The execution group is composed of Matrix Reasoning, Coding, Figure Weights, Block Design, Picture Concepts, Symbol Search and Mazes. Many studies have been conducted and, although improvements have

For peer review only - <http://bmjopen.bmj.com/site/about/guidelines.xhtml>

1  
2  
3  
4  
5  
6  
7  
8  
9  
10  
11  
12  
13  
14  
15  
16  
17  
18  
19  
20  
21  
22  
23  
24  
25  
26  
27  
28  
29  
30  
31  
32  
33  
34  
35  
36  
37  
38  
39  
40  
41  
42  
43  
44  
45  
46  
47  
48  
49  
50  
51  
52  
53  
54  
55  
56  
57  
58  
59  
60

been made with the addition of new items, the fundamental characteristics of the WISC and WISC-R remained the same in WISC III.<sup>[50]</sup>

#### 4. Procedures

##### 4.1 Transcranial direct current stimulation

Stimulation will be administered using a TDCS device (*DC-Stimulator NeuroCo nn*, Germany), with three sponge (non-metallic) surface electrodes measuring 5 x 7 cm soaked in saline solution. The children will be randomly allocated to two types of treatment: 1) active anodal stimulation over the primary cortex bilaterally; and 2) sham transcranial stimulation. The two anodal electrodes will be positioned over C3 and C4 of the 10-20 international electroencephalogram system<sup>[37]</sup> and the cathode will be positioned over the right deltoid muscle. This montage will enable the child to receive anodal stimulation of the primary motor cortex, specifically the area that manages upper limb motor control, and minimize the effect of cathodal stimulation in the brain. Sham stimulation will consist of the same electrode montage and the stimulator will be switched on for 30 seconds, giving the child the initial sensation of stimulation, but no current will be administered during the remainder of the session. This is considered a valid control procedure in studies involving TDCS. A current of 1mA will be administered over the primary motor cortex for 20 minutes during the upper limb motor training activity. The stimulator has a knob that allows the operator to control the intensity of the current. At the beginning of the session, stimulation will be increased gradually until reaching 1mA and gradually diminished during the final ten seconds of the session.

**Adverse effects:** Potential adverse effects of TDCS will be evaluated at the end of each session using a questionnaire administered to the child. The questionnaire will address the perception of symptoms having occurred during the session, such as tingling, a burning sensation, headache, pain at the electrode sites, sleepiness and altered mood. The children will be instructed to answer using a three-point scale. The caregivers and children will also be asked open-ended questions at the beginning of each session regarding the occurrence of headache, scalp pain, burning sensation, redness of the skin, sleepiness, difficulty concentrating and mood swings during periods between sessions.

## 4.2 Virtual reality training protocol

Training sessions will be held three times per week on non-consecutive days. Each session will last 20 minutes and will involve the use of the XBOX 360™ with the Kinect™ motion detector. The game entitled “Bursting Bubbles” of the Adventure set of games was chosen based on the potential to stimulate cognitive skills and enhance execution time, motor coordination, attention, concentration, reasoning, memory, persistence and precise movement. The activity will be held in a specific room of the Integrated Movement Analysis Laboratory measuring 2.5 x 4.0 m, with a projection screen (200 x 150 cm) attached to the wall and stereo speakers to provide adequate visual and auditory stimuli. Initially, the child will be instructed to remain standing at a distance of two to three meters in front of the motion detector to capture the movements better as well as for the estimation of height and calculation of the body mass index. Two mobility training sessions with the use of the XBOX 360 exercises will be performed prior to the onset of the intervention protocol. Records will be made of the number of sessions attended and duration of each session.

## 5. Analysis of results

The Shapiro-Wilk test will be used to determine whether the data adhere to the Gaussian curve. Parametric variables will be expressed as mean and standard deviation. Nonparametric variables will be expressed as median and interquartile range. Effect sizes will be calculated from the differences in means between the pre-intervention and post-intervention evaluations. The effect size values will be expressed with respective 95% confidence intervals. Either two-way ANOVA (parametric variables) or the Kruskal-Wallis test (non-parametric variables) will be used for the analysis of the effects of the upper limb motor training activity with active and sham TDCS. Logistic regression models will be created to determine factors predictive of the response to the intervention. For such, movement velocity and total duration of movement will be considered. The response capacity will be defined as a clinically significant increase in performance in comparison to baseline. The independent variables will be age (years), sex (male/female), activity of elbow flexors and extensors, cerebral activity (C3 and C4) and functional independence (aspects of self-care). Univariate regressions will be performed for each variable. Based on the initial analyses, the predictors associated with the outcome with a p-value  $\leq 0.05$  will be incorporated into the multivariate model. Moreover, Pearson’s correlation coefficients will be calculated to determine correlations among the variables analyzed. A p-value  $< 0.05$  will be considered indicative of statistical significance. The data will be

1  
2  
3 organized and tabulated with the aid of the Statistical Package for the Social Sciences  
4 (SPSS v.19.0).  
5  
6

## 7 8 **6. Discussion**

9  
10 As upper limb motor control enables individuals to perform functional activities, virtual  
11 reality will be used as a therapeutic tool to enhance motor control. Moreover, a noninvasive  
12 brain stimulation method TDCS will be employed to facilitate motor cortical excitability in  
13 the areas subjacent to stimulation to enhance the effects of motor control and learning. This  
14 document offers a detailed description of a randomized, controlled, double-blind, clinical  
15 trial designed to determine the effectiveness of VR training combined with TDCS on upper  
16 limb movements in individuals with DS.  
17  
18  
19  
20  
21

## 22 **7. Ethical aspects and divulgation**

23  
24 The present study is in compliance with the guidelines regulating studies involving  
25 human subjects established by the Brazilian National Board of Health in October 1996 and  
26 updated in Resolution 466 in 2012. The study will be developed at the Integrated  
27 Movement Analysis Laboratory of University Nove de Julho (Sao Paulo, Brazil) and has  
28 received approval from the Human Research Ethics Committee of the university under  
29 process number 1.517.470 (APPENDIX 1). The protocol has been registered with Clinical  
30 Trials. All legal guardians will receive clarifications regarding the procedures and will be  
31 aware that participation is voluntary, free of cost and experimental. Those who agree to  
32 their child's participation will sign a statement of informed consent (APPENDIX 2). The  
33 guardians will be assured of access to all information and will be informed of the possibility  
34 of dropping out of the study or withdrawing consent at any time with no negative  
35 consequences. The anonymity of the children and the confidentiality of their information  
36 will be ensured, following the ethical principles of privacy. The findings will be published  
37 and will contribute evidence regarding the use of transcranial direct current stimulation  
38 combined with upper limb motor training in this population.  
39  
40  
41  
42  
43  
44  
45  
46  
47  
48  
49

## 50 **8. Conflict of Interest Statement**

51  
52 The authors have no financial or competing interests  
53  
54

## 55 **9. Acknowledgments and funding**

56  
57 The authors gratefully acknowledge financial support from the Brazilian fostering agencies  
58 Foundation for Research Support (FAPESP - 2016 / 11156-0), Coordination for the  
59 Improvement of Higher Education Personnel (CAPES), and the National Council for  
60 Scientific and Technological Development (CNPq).  
For peer review only - <http://bmjopen.bmj.com/site/about/guidelines.xhtml>

## 10. Abbreviations

DS: Down Syndrome; TDCS: Transcranial direct-current stimulation; EMG: Electromyography; PEDI: Pediatric Evaluation of Disability Inventory; WISC III: Wechsler Intelligence Scale for Children; VR: Virtual Reality

## 11. List of Figures

**Figure 1:** Flowchart of study based on CONSORT statement

**Figure 2:** Placement of markers for three-dimensional analysis using *SMARTup: The experimental setup*

**Figure 3:** Phases of reaching cycle

**Figure 4:** Phase relationships. (A) synchronized signals – differences in phases between both signals are stable (constant); (B) non-synchronized signals – a differences in phases are variable

**Figure 5:** Positioning of EEG electrodes based on 10-20 standard



## REFERENCES

1. Moreira LMA, El-Hani CN, Gusmão FAF. **A síndrome de down e sua patogênese: considerações sobre o determinismo genético.** Rev Bras Psiquiatr. 2000; 22(2): 96-9.
2. Lewada AF, Matsonff A, Revenis M, Futtermam C, Nino G, Greenberg J, et al. **Preoperative evaluation and comprehensive risk assessment for children with Down syndrome.** *Pediatric Anesthesia*. 2016; 26: 356–362.
3. Moreira LMA, Gusmão FAF. **Aspectos genéticos e sociais da sexualidade em pessoas com síndrome de Down.** Rev Bras Psiquiatria. 2002; 24(2): 94-9.
4. Silva MFMC, Kleinahas ACS. **Cognitive processes and brain plasticity in Down Syndrome.** Revis. Bras. Edc. Esp. 2006; 12: 123-138.
5. Luria, AR, Tskvetkova, LS. **The programing of constructive activety in local brain injuries.** *Neuropsychologia* .1964; 95-107.
6. Flórez BJ, Troncoso VM. **Síndrome de Down y educación.** 3. reimp. Barcelona: Masson – Salvat Medicina y Santander, 1997.
7. Santos APM, Weiss LI, Almeida GMF. **Assessment and intervention in the motor development of a child with Down syndrome.** Rev Bras Ed Esp Marília. 2010; 16: 19-30.
8. Bomono LMM, Rosseti CB. **Aspects in perceptual-motor development and sensory-motor intelligence in Down syndrome.** Rev bras crescimento desenvolv hum. 2010; 3: 723-734.
9. Polastri PV, Barela JA **Percepção-ação no desenvolvimento motor de crianças portadoras de Síndrome de Down.** Revista da Sobama. 2002; 7: 1-8.
10. Dessen MA, Silva NLP. **Deficiência mental e família: uma análise da produção científica.** Cadernos de Psicologia e Educação Paidéia. 2000; 10: 12-23.
11. Latash ML, Corcos DM. **Kinematic and electromyographic characteristics of single-joint movements of individuals with Down syndrome.** Am J Ment Retard. 1991; 96: 189-201.
12. Almeida GL, Corcos DM, Latash ML. **Practice and transfer effects during fast single-joint elbow movements in individuals with Down syndrome.** Phys Ther. 1994; 74: 1000-1016.
13. Almeida GL, Hasan Z, Corcos DM. **Horizontal-plane arm movements with direction reversals performed by normal individuals and individuals with Down syndrome.** J Neurophysiol. 2000; 84: 1949-1960.
14. Aruin AS, Almeida GL, Latash ML. **Organization of a simple two-joint synergy in individuals with Down syndrome.** Am J Ment Retard. 1996; 101: 256-268.
15. Aruin, AS, Almeida GL. **A co-activation strategy in anticipatory postural adjustments in persons with Down syndrome.** Motor Control 1997; 01: 178-191.
16. Latash ML, Anson JG. **What are “normal movements” in atypical populations.** Behav Brain Sci. 1996; 19: 55-68.
17. Marconi NF. **Controle motor de movimentos de reversão em indivíduos neurologicamente normais e portadores da síndrome de Down: O efeito do feedback intrínseco [dissertação].** Campinas (SP): Universidade Estadual de Campinas; 2000.

18. Ferreira SMS. **Modulação da Latência da Musculatura Antagonista em Indivíduos "neurologicamente normais" e portadores da Síndrome de Down** [dissertação]. Rio Claro (SP): Universidade Estadual Paulista; 2000.
19. Marconi NF. **Controle motor de movimentos de reversão do braço em indivíduos neurologicamente normais e portadores da síndrome de Down: O efeito do treinamento** [tese]. Campinas (SP): Universidade Estadual de Campinas; 2005.
20. Anson JG. **Neuromotor control and Down syndrome**. In: JJ Summers, editores. **Approaches to the study of motor control and learning**. Amsterdam; 1992: 387-41.
21. Lawrence GP, Reilly NE, Mottram TM, Khan MA, Elliott. **Sequential aiming movements and the one-target advantage in individuals with Down Syndrome**. Res in Dev Disabil 2013; 34: 3858–3866.
22. Vimercatti SL, Galli M, Stella G, Ancilão A, Albertini G. **Motor strategies and motor programs during an arm tapping task in adults with Down**. Ex Brain Res. 2013; 225: 333-8.
23. Lorenzo SM, Braccialli LMP, Araújo RCT. **Realidade virtual como intervenção na Síndrome de down: uma perspectiva de ação na interface educação e saúde**. Rev Bras Educ Espc. 2015; 21: 392-396.
24. Wuang YP, Chiang CS, Su CY, Wang CC. **Effectiveness of virtual reality using Wii gaming technology in children with Down syndrome**. Res Dev Disabil. 2011; 32: 312–321.
25. Lin HC, WuangYP. **Strength and agility training in adolescents with Down syndrome: A randomized controlled trial**. Res Dev Disabil. 2012; 33: 2236–2244.
26. Mello BCC, Ramalho TF. **Use of virtual reality in the physical therapeutic treatment of individuals with Down syndrome**. Rev Neurocienc. 2015; 23: 143-149.
27. Stagg CJ, Bachtiar V, O’Shea J, Allman C, Bosnell RA, Kischka U, Matthews PM, Johansen-Berg H. **Cortical activation changes underlying stimulation induced behavioral gains in chronic stroke**. Brain. 2012; 135:276-84.
28. Miranda PC, Lomarev M, Hallett M. **Modeling the current distribution during transcranial direct current stimulation**. Clin Neurophysiol. 2006; 117(7):1623-9.
29. Wagner T, Fregni F, Fecteau S, Grodzinsky A, Zahn M, Pascual-Leone A. **Transcranial direct current stimulation: A computer-based human model study**. Neuroimage 2007; 35:1113-24.
30. Liebetanz D, Nitsche MA, Teragau F, Paulus W. **Pharmacological approach to the mechanisms of transcranial DC- stimulation- induced after-effects of human motor cortex excitability**. Brain 2002; 125: 2238-47.
31. Kuo MF, Unger M, Liebetanz D, Lang N, Tergau F, Paulus W, Nittshe MA. **Limited impact of homeostatic plasticity on motor learning in humans**. Neuropsychologia. 2008; 46: 2122-8.
32. Monte-SilvaK,Kuo M-F, Thirugnanasambandam N,Liebetanz D, Paulus W, Nitsche MA. **Dose-dependent inverted U-shaped effect of dopamine (D2-like) receptor activation on focal and nonfocal plasticity in humans**. The Journal of Neuroscience. 2009; 29 (19):6124-31.
33. Nitsche MA, Liebetanz D, Schlitterlau a, Henschke U, Friche K, Frommann K, et al. **GABAergic modulation of DC stimulation-induced motor cortex excitability shifts in humans**. Eur J Neurosc. 2004;19(10): 2720-6.

- 1  
2  
3  
4  
5  
6  
7  
8  
9  
10  
11  
12  
13  
14  
15  
16  
17  
18  
19  
20  
21  
22  
23  
24  
25  
26  
27  
28  
29  
30  
31  
32  
33  
34  
35  
36  
37  
38  
39  
40  
41  
42  
43  
44  
45  
46  
47  
48  
49  
50  
51  
52  
53  
54  
55  
56  
57  
58  
59  
60
34. Mendonça ME, Fregni F. **Neuromodulação com estimulação cerebral não invasiva: aplicação no acidente vascular encefálico, doença de Parkinson e dor crônica.** In.: ASSIS, R.D. *Conduitas práticas em fisioterapia neurológica.* Manole. São Paulo, p. 307-39, 2012.
  35. Fregni F, Gimenes R, Valle AC, Ferreira MJ, Rocha RR, Natalle L, Bravo R, Rigonatti SP, Freedman S, Nitsche M, Pascual-Leone A, Boggio PS. **A randomized, sham-controlled, proof of principle study of transcranial direct current stimulation for the treatment of pain in fibromyalgia.** *Arthritis and Rheumatism*, 2006; 54:3988-98.
  36. Fregni F, Bossio PS, Brunoni AR. **Neuromodulação terapêutica: Princípios e avanços da estimulação cerebral não invasiva em neurologia, reabilitação, psiquiatria e neuropsicologia.** Sarvier. São Paulo, 2012.
  37. Fritsch B, Reis J, Martinowich K, Schambra HM, Ji Y, Cohen LG, et al. **Direct current stimulation promotes BDNF-dependent synaptic plasticity: potential implications for motor learning.** *Neuron*. 2010;66(2): 198-204.
  38. Reis J, Robertson EM, Krakauer JW, Rothwell J, Marshall L, Gerloff C, et al. **Consensus: Can transcranial direct current stimulation and transcranial magnetic stimulation enhance motor learning and memory formation.** *Brain stimulation*. 2008;1(4): 363-9.
  39. Antal A, Lang N, Boros K, Nitsche M, Siebner HR, Paulus W. **Homeostatic metaplasticity of the motor cortex is altered during headache-free intervals in migraine with aura.** *Cerebral cortex*. 2008;18(11):2701-5.
  40. Cimolin V, Beretta E, Piccinini L, Turconi AC, Galli M, Strazzer S. **Constraint-induced movement therapy for children with hemiplegia after traumatic brain injury: a quantitative study.** *J Head Trauma Rehabil*. 2012; 27(3): 177-87.
  41. Menegoni F, Milano E, Trotti C, Galli M, Bigoni M, Baudo S, Mauro A. **Quantitative evaluation of functional limitation of upper limb movements in subjects affected by ataxia.** *Eur J Neurol*. 2009; 16(2): 232-9.
  42. Petuskey K, Bagley A, Abdala E, James MA, Rab G. **Upper extremity kinematics during functional activities: three-dimensional studies in a normal pediatric population.** *Gait Posture*. 2007; 25(4): 573-9.
  43. Hermes JH, Freriks B, Merletti R, Stegeman D, Blok J, Rau G, Disselhorst-Klug C, Hagg G: **SENIAM 8: Surface Electromyography for the Non-Invasive Assessment of Muscles.** Roessingh Research and Development 1999.
  44. Rab G, Petuskey K, Bagley A. **A method for determination of upper extremity kinematics.** *Gait Posture*. 2002; 15(2): 113-9.
  45. Jasper HH. **The ten-twenty electrode system of the International Federation electroencephalography.** *Clin Neurophysiol*. 1958; 10: 371-375.
  46. Homan RW, Herman J, Purdy P. **Cerebral location of international 10-20 system electrode placement.** *Electroencephalogr Clin Neurophysiol*. 1987; 66(4): 376-82.
  47. FELL, J.; AXMACHER, N. The role of phase synchronization in memory processes. **Nature Reviews Neuroscience**, v. 12, n. 2, p. 105–118, fev. 2011

- 1  
2  
3  
4  
5 48. Haley S, Coster W, Ludlow L. **Inventário de avaliação pediátrica de disfunção: versão**  
6 **brasileira**. Tradução e adaptação cultural: Mancini M C. Belo Horizonte: Laboratórios de  
7 Atividade e Desenvolvimento Infantil, Departamento de Terapia Ocupacional, Universidade  
8 Federal de Minas Gerais. 2000.  
9  
10  
11 49. Feldman AB, Haley SM, Corvell J. **Concurrent and construct validity of the Pediatric**  
12 **Evaluation of Disability Inventory**. Phys. Ther. 1990; 70(10): 602-10.  
13  
14 50. Cruz MBZ, WISC III: **Escala de Inteligência Wechsler para crianças: Manual**.  
15 *Periodicos eletrônicos em psicologia*. 2005; 4: 309.  
16  
17  
18  
19  
20  
21  
22  
23  
24  
25  
26  
27  
28  
29  
30  
31  
32  
33  
34  
35  
36  
37  
38  
39  
40  
41  
42  
43  
44  
45  
46  
47  
48  
49  
50  
51  
52  
53  
54  
55  
56  
57  
58  
59  
60

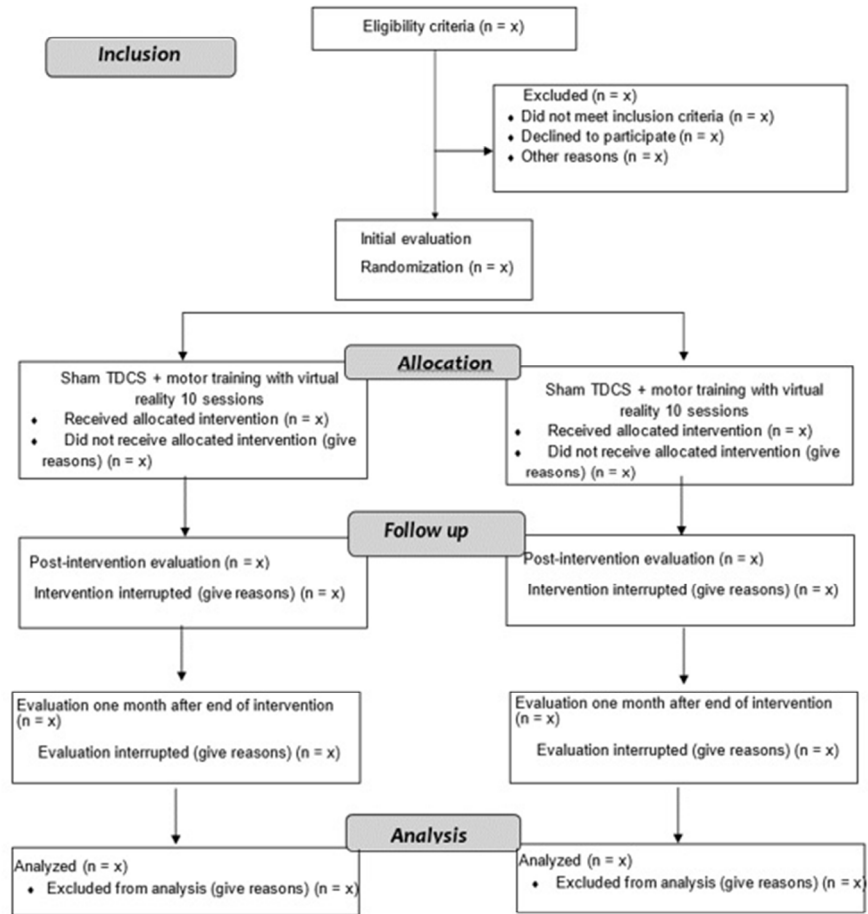

Figure 1: Flowchart of study following CONSORT statement

Legend: TDCS = transcranial direct current stimulation

Figure 1: Flowchart of study following CONSORT statement

Legend: TDCS = transcranial direct current stimulation

163x199mm (96 x 96 DPI)

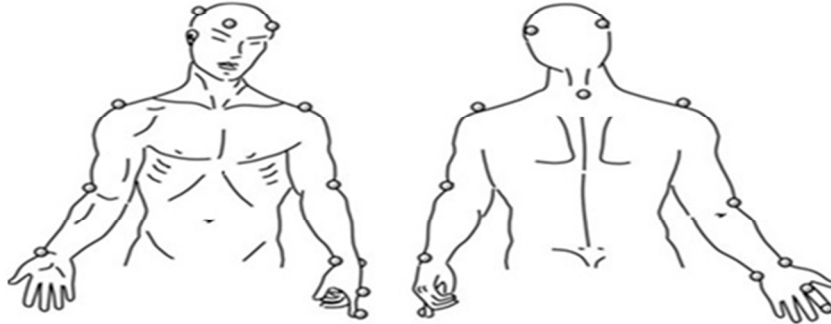

**Figure 2:** Placement of markers for three-dimensional analysis using *SMARTup: The experimental setup*<sup>40</sup>

Figure 2: Placement of markers for three-dimensional analysis using SMARTup: The experimental setup

178x110mm (96 x 96 DPI)

1  
2  
3  
4  
5  
6  
7  
8  
9  
10  
11  
12  
13  
14  
15  
16  
17  
18  
19  
20  
21  
22  
23  
24  
25  
26  
27  
28  
29  
30  
31  
32  
33  
34  
35  
36  
37  
38  
39  
40  
41  
42  
43  
44  
45  
46  
47  
48  
49  
50  
51  
52  
53  
54  
55  
56  
57  
58  
59  
60

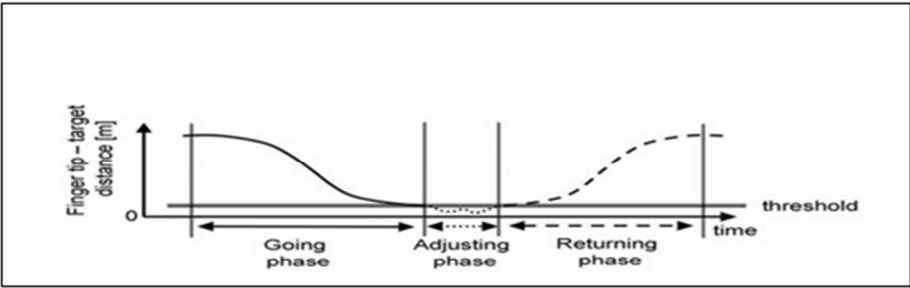

Figure 3: Phases of reaching cycle<sup>40</sup>

Figure 3: Phases of reaching cycle  
165x98mm (96 x 96 DPI)

review only

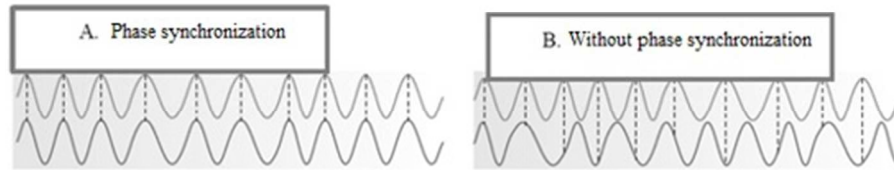

**Figure 4** – Phase relationships. (A) synchronized signals – differences in phases between both signals are stable (constant); (B) non-synchronized signals – a differences in phases are variable<sup>47</sup>

Figure 4 – Phase relationships. (A) synchronized signals – differences in phases between both signals are stable (constant); (B) non-synchronized signals – a differences in phases are variable

161x79mm (96 x 96 DPI)



1  
2  
3  
4  
5  
6  
7  
8  
9  
10  
11  
12  
13  
14  
15  
16  
17  
18  
19  
20  
21  
22  
23  
24  
25  
26  
27  
28  
29  
30  
31  
32  
33  
34  
35  
36  
37  
38  
39  
40  
41  
42  
43  
44  
45  
46  
47  
48  
49  
50  
51  
52  
53  
54  
55  
56  
57  
58  
59  
60

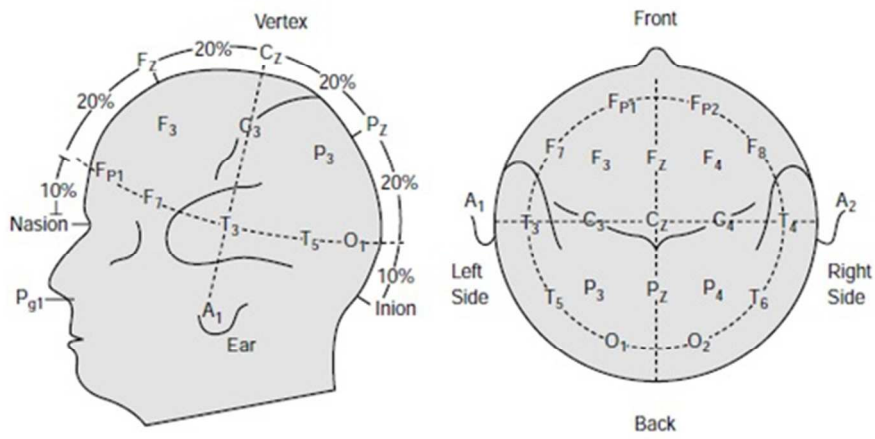

**Figure 5** – Positioning of EEG electrodes following 10-20 standard<sup>45</sup>

Figure 5 – Positioning of EEG electrodes following 10-20 standard

169x128mm (96 x 96 DPI)

ew only

## APPENDIX 1

## Termo de Consentimento para Participação em Pesquisa Clínica

Nome do Voluntário: \_\_\_\_\_

Endereço: \_\_\_\_\_

Telefone para contato: \_\_\_\_\_ Cidade: \_\_\_\_\_ CEP: \_\_\_\_\_

E mail: \_\_\_\_\_

1. As informações contidas neste prontuário foram fornecidas pela aluna Jamile Benite Palma Lopes (Mestranda da Universidade Nove de Julho), Prof<sup>ª</sup>. Claudia Santos Oliveira, objetivando firmar acordo escrito mediante o qual, o voluntário da pesquisa autoriza sua participação com pleno conhecimento da natureza dos procedimentos e riscos a que se submeterá, com a capacidade de livre arbítrio e sem qualquer coação.

2. Título do Trabalho Experimental: Realidade virtual e estimulação transcraniana por corrente contínua anódica para melhora da função motora de membros superiores em crianças com síndrome de down: ensaio clínico controlado aleatorizado e duplo cego.

3. Objetivo: Examinar os efeitos da estimulação por corrente sobre o controle motor, atividade dos músculos, atividade do cérebro e independência funcional de crianças com Síndrome de Down.

4. Justificativa: acredita-se que ao aplicar a estimulação por corrente, especificamente, durante o treino motor com uso de um vídeo game, será possível, otimizar a atividade do cérebro e a melhora motora.

5. Procedimentos da Fase Experimental: Será selecionadas crianças diagnosticadas com Síndrome de Down, com capacidade de entendimento e colaboração para realização dos procedimentos envolvidos no estudo, crianças com idade entre seis e 12 anos, crianças com queixas de comprometimento Na coordenação motora dos braços. O processo de avaliação (antes, após e um mês após o treino, será realizado em três dias não consecutivos, mas na mesma semana, com período máximo de uma hora e 30 minutos por dia. A avaliação será constituída dos seguintes itens: (1) Análise de movimento dos braços durante uma tarefa: avaliado pela cinemática, eletromiografia e eletroencefalograma, a criança realizara uma tarefa com os braços e ao mesmo tempo será avaliada pelos aparelhos, sendo acompanhada pelo fisioterapeuta responsável e pelos assistentes (2) PEDI o PEDI é um questionário aplicado no formato de entrevista estruturada com um dos cuidadores da criança, que possa informar sobre seu desempenho em atividades e tarefas típicas da rotina diária. O teste é composto de três partes: a primeira avalia habilidades de repertório da criança agrupadas segundo três áreas

1  
2  
3  
4  
5  
6  
7  
8  
9  
10  
11  
12  
13  
14  
15  
16  
17  
18  
19  
20  
21  
22  
23  
24  
25  
26  
27  
28  
29  
30  
31  
32  
33  
34  
35  
36  
37  
38  
39  
40  
41  
42  
43  
44  
45  
46  
47  
48  
49  
50  
51  
52  
53  
54  
55  
56  
57  
58  
59  
60

funcionais: autocuidado (73 itens), mobilidade (59 itens) e função social (65 itens). Cada item dessa parte é pontuado com escore 0 (zero) se a criança não é capaz de desempenhar a atividade, ou 1 (um), se a atividade fizer parte de seu repertório de habilidades. O Grupo 1 terá o movimento do braço analisado após realizar treino com o vídeo game junto com a estimulação desligada (placebo). O Grupo 2 terá o movimento do braço analisado após realizar treino com o vídeo game junto com a estimulação ligada. A estimulação por corrente é uma técnica não invasiva que será realizada colocando eletrodos de superfície conectados a um aparelho de corrente galvânica (corrente elétrica de baixa intensidade) sobre o crânio (cabeça) da criança, durante 20 minutos por 15 dias. A estimulação é indolor.

6. Desconforto ou Risco Esperado: Embora os procedimentos adotados no estudo sejam não-invasivos os voluntários serão submetidos a risco como por exemplo, quedas, fadiga muscular, câimbras durante o treino motor de realidade virtual. Para que estes riscos sejam minimizados ao máximo serão adotadas as seguintes medidas protetoras: A estimulação será realizada por uma fisioterapeuta com experiência na técnica. No treino de realidade virtual serão realizados por uma fisioterapeuta com experiência em treino motor que será acompanhada por ao menos um voluntário ambos permanecerão posicionados do lado do paciente por todo o treino.

7. Informações: o voluntário tem garantia que receberá respostas a qualquer pergunta ou esclarecimento de qualquer dúvida quanto aos procedimentos, riscos benefícios e outros assuntos relacionados com pesquisa. Também os pesquisadores supracitados assumem o compromisso de proporcionar informação atualizada obtida durante o estudo, ainda que esta possa afetar a vontade do indivíduo em continuar participando.

8. Retirada do Consentimento: o voluntário tem a liberdade de retirar seu consentimento a qualquer momento e deixar de participar do estudo, sem que isto lhe traga qualquer prejuízo.

9. Aspecto Legal: Elaborados de acordo com as diretrizes e normas regulamentadas de pesquisa envolvendo seres humanos atendendo à Resolução nº. 466/12 do Conselho Nacional de Saúde do Ministério de Saúde – Brasília – DF.

10. Garantia de Sigilo: Os pesquisadores asseguram a privacidade dos voluntários quanto aos dados confidenciais envolvidos na pesquisa.

11. Formas de ressarcimento das despesas decorrentes da participação na pesquisa: Se necessário, será dado aos pesquisados auxílio transporte de ida e volta ao local da pesquisa. Não será dada ao pesquisado qualquer tipo de remuneração e auxílio de custo pela participação na pesquisa. Pelo curto tempo das avaliações e intervenções não haverá fornecimento de alimentação ao pesquisado.

For peer review only - <http://bmjopen.bmj.com/site/about/guidelines.xhtml>

1  
2  
3  
4  
5  
6  
7  
8  
9  
10  
11  
12  
13  
14  
15  
16  
17  
18  
19  
20  
21  
22  
23  
24  
25  
26  
27  
28  
29  
30  
31  
32  
33  
34  
35  
36  
37  
38  
39  
40  
41  
42  
43  
44  
45  
46  
47  
48  
49  
50  
51  
52  
53  
54  
55  
56  
57  
58  
59  
60

12. Local da Pesquisa: A pesquisa será desenvolvida no Laboratório Integrado de Análise do Movimento Humano - LIAMH e Núcleo de Apoio a Pesquisa na Análise do Movimento - NAPAM, Universidade Nove de Julho UNINOVE, localizada na rua Vergueiro, no 235/249, 2º subsolo, Vergueiro, São Paulo - SP.

13. Comitê de Ética em Pesquisa (CEP) é um colegiado interdisciplinar e independente, que deve existir nas instituições que realizam pesquisas envolvendo seres humanos no Brasil, criado para defender os interesses dos participantes de pesquisas em sua integridade e dignidade e para contribuir no desenvolvimento das pesquisas dentro dos padrões éticos (Normas e Diretrizes Regulamentadoras da Pesquisa envolvendo Seres Humanos – Res. CNS nº 466/12). O Comitê de Ética é responsável pela avaliação e acompanhamento dos protocolos de pesquisa no que corresponde aos aspectos éticos.

**Endereço do Comitê de Ética da Uninove: Rua. Vergueiro nº 235/249 – 3º subsolo - Liberdade – São Paulo – SP CEP. 01504-001 Fone: 3385-9197 . comitedeetica@uninove.br**

14. Nome Completo e telefones dos pesquisadores para contato: Orientadora: Claudia Santos Oliveira (11 3665 9344) e aluno de pós graduação: Jamile Benite Palma Lopes (11) 975123549.

15. Eventuais intercorrências que vierem a surgir no decorrer da pesquisa poderão ser discutidas pelos meios próprios.

16. Consentimento Pós-Informação:

Eu, \_\_\_\_\_, após leitura e compreensão deste termo de informação e consentimento, entendo que minha participação é voluntária, e que posso sair a qualquer momento do estudo, sem prejuízo algum. Confirmando que recebi cópia deste termo de consentimento, e autorizo a execução do trabalho de pesquisa e a divulgação dos dados obtidos neste estudo no meio científico.

\* Não assine este termo se ainda tiver alguma dúvida a

respeito. São Paulo, de de 2016.

Nome (por extenso) do pesquisado:

Assinatura pesquisado:

Nome (por extenso) do pesquisado:

Assinatura pesquisado:

1  
2  
3  
4  
5  
6  
7  
8  
9  
10  
11  
12  
13  
14  
15  
16  
17  
18  
19  
20  
21  
22  
23  
24  
25  
26  
27  
28  
29  
30  
31  
32  
33  
34  
35  
36  
37  
38  
39  
40  
41  
42  
43  
44  
45  
46  
47  
48  
49  
50  
51  
52  
53  
54  
55  
56  
57  
58  
59  
60

For peer review only

**APPENDIX 2**

## Approval of the Ethics Committee

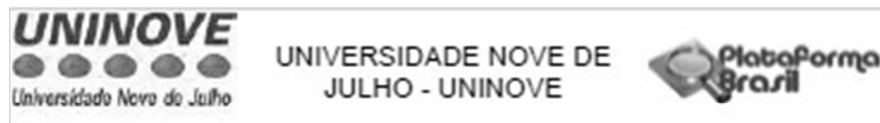**PARECER CONSUBSTANCIADO DO CEP****DADOS DO PROJETO DE PESQUISA**

**Título da Pesquisa:** REALIDADE VIRTUAL E ESTIMULAÇÃO TRANSCRANIANA POR CORRENTE CONTÍNUA PARA MELHORA DA FUNÇÃO MOTORA DE MEMBROS SUPERIORES EM CRIANÇAS COM SÍNDROME DE DOWN: ENSAIO CLÍNICO CONTROLADO ALEATORIZADO E DUPLO CEGO

**Pesquisador:** Jamile Benite Palma Lopes

**Área Temática:**

**Versão:** 1

**CAAE:** 55196516.0.0000.5511

**Instituição Proponente:** ASSOCIAÇÃO EDUCACIONAL NOVE DE JULHO

**Patrocinador Principal:** Financiamento Próprio

**DADOS DO PARECER**

**Número do Parecer:** 1.517.470

**Apresentação do Projeto:**

O projeto chama a atenção para as dificuldades motoras apresentadas por crianças com síndrome de down, e sugere uma intervenção que possibilite uma melhora no controle motor dessa população.

**Objetivo da Pesquisa:**

Verificar os efeitos da estimulação transcraniana por corrente contínua (tDCS) associado a um treino neuromotor em membro superior com realidade virtual sobre a atividade cerebral e controle motor em crianças com Síndrome de Down (SD).

**Avaliação dos Riscos e Benefícios:**

Embora os procedimentos adotados no estudo sejam não-invasivos os voluntários serão submetidos a risco como por exemplo, quedas, fadiga muscular, câimbras durante o treino motor de realidade virtual. Para que estes riscos sejam minimizados ao máximo serão adotadas as seguintes medidas protetoras: A estimulação transcraniana será realizada por uma fisioterapeuta com experiência na técnica. No treino de realidade virtual serão realizados por uma fisioterapeuta com experiência em treino motor que será acompanhada por ao menos um voluntário ambos

Endereço: VERQUEIRO nº 295/240  
Bairro: LIBERDADE CEP: 01.504-001  
UF: SP Município: SAO PAULO  
Telefone: (11)3385-0197 E-mail: comitedeetica@uninove.br

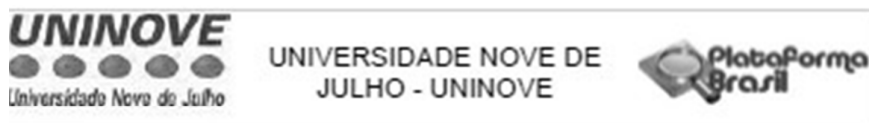

Continuação do Parecer: 1.517.470

permanecerão posicionados do lado do paciente por todo o treino.

**Comentários e Considerações sobre a Pesquisa:**

O projeto apresenta as características éticas necessárias para realização da pesquisa.

**Considerações sobre os Termos de apresentação obrigatória:**

Foram apresentados os termos exigidos para aprovação da pesquisa.

Considerando que tratam-se de crianças com Síndrome de Down, não é necessário o TCLE específico para menores.

**Recomendações:**

O TCLE, embora apresente os aspectos exigidos, ele deve ser reescrito, uma vez que se encontra com uma linguagem estritamente técnica sobre os procedimentos que serão realizados na pesquisas, assim como constitui-se num documento muito longo (com 6 páginas).

**Conclusões ou Pendências e Lista de Inadequações:**

Recomenda-se reescrever o TCLE, adequando a linguagem (mais simples e acessível ao responsável pela criança participante)

Resumir as informações tomando o TCLE mais simplificado e objetivo.

Este parecer foi elaborado baseado nos documentos abaixo relacionados:

| Tipo Documento                                            | Arquivo                                      | Postagem               | Autor                     | Situação |
|-----------------------------------------------------------|----------------------------------------------|------------------------|---------------------------|----------|
| Informações Básicas do Projeto                            | PB_INFORMAÇÕES_BASICAS_DO_PROJETO_693482.pdf | 12/04/2016<br>15:41:42 |                           | Aceito   |
| Folha de Rosto                                            | DOC120416.pdf                                | 12/04/2016<br>15:40:49 | Jamile Benite Palma Lopes | Aceito   |
| Projeto Detalhado / Brochura Investigador                 | projetofinal.pdf                             | 06/04/2016<br>16:57:04 | Jamile Benite Palma Lopes | Aceito   |
| TCLE / Termos de Assentimento / Justificativa de Ausência | Termo.pdf                                    | 06/04/2016<br>16:46:17 | Jamile Benite Palma Lopes | Aceito   |
| Cronograma                                                | cronograma.pdf                               | 06/04/2016<br>16:45:48 | Jamile Benite Palma Lopes | Aceito   |

**Situação do Parecer:**

Pendente

**Necessita Apreciação da CONEP:**

Endereço: VERGUEIRO nº 235/240  
 Bairro: LIBERDADE CEP: 01.504-001  
 UF: SP Município: SAO PAULO  
 Telefone: (11)3385-0197 E-mail: comitedeetica@uninove.br

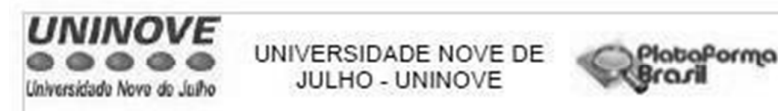

Continuação do Parecer: 1.517.470

Não

SAO PAULO, 27 de Abril de 2016

Assinado por:  
 Stella Regina Zamuner  
 (Coordenador)

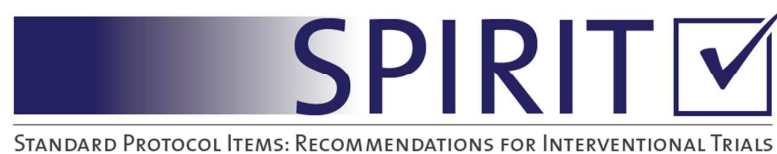

SPIRIT 2013 Checklist: Recommended items to address in a clinical trial protocol and related documents\*

| Section/item                      | Item No | Description                                                                                                                                                                                                                                                                              | Addressed on page number |
|-----------------------------------|---------|------------------------------------------------------------------------------------------------------------------------------------------------------------------------------------------------------------------------------------------------------------------------------------------|--------------------------|
| <b>Administrative information</b> |         |                                                                                                                                                                                                                                                                                          |                          |
| Title                             | 1       | Descriptive title identifying the study design, population, interventions, and, if applicable, trial acronym                                                                                                                                                                             | <u>01</u>                |
| Trial registration                | 2a      | Trial identifier and registry name. If not yet registered, name of intended registry                                                                                                                                                                                                     | <u>03-08-14</u>          |
|                                   | 2b      | All items from the World Health Organization Trial Registration Data Set                                                                                                                                                                                                                 | <u>14</u>                |
| Protocol version                  | 3       | Date and version identifier                                                                                                                                                                                                                                                              | <u>NA</u>                |
| Funding                           | 4       | Sources and types of financial, material, and other support                                                                                                                                                                                                                              | <u>15</u>                |
| Roles and responsibilities        | 5a      | Names, affiliations, and roles of protocol contributors                                                                                                                                                                                                                                  | <u>01-02-03</u>          |
|                                   | 5b      | Name and contact information for the trial sponsor                                                                                                                                                                                                                                       | <u>01-02-14</u>          |
|                                   | 5c      | Role of study sponsor and funders, if any, in study design; collection, management, analysis, and interpretation of data; writing of the report; and the decision to submit the report for publication, including whether they will have ultimate authority over any of these activities | <u>08-14</u>             |
|                                   | 5d      | Composition, roles, and responsibilities of the coordinating centre, steering committee, endpoint adjudication committee, data management team, and other individuals or groups overseeing the trial, if applicable (see Item 21a for data monitoring committee)                         | <u>14</u>                |



1  
2  
3  
4  
5  
6  
7  
8  
9  
10  
11  
12  
13  
14  
15  
16  
17  
18  
19  
20  
21  
22  
23  
24  
25  
26  
27  
28  
29  
30  
31  
32  
33  
34  
35  
36  
37  
38  
39  
40  
41  
42  
43  
44  
45  
46  
47  
48  
49

**Introduction**

|                          |    |                                                                                                                                                                                                           |                             |
|--------------------------|----|-----------------------------------------------------------------------------------------------------------------------------------------------------------------------------------------------------------|-----------------------------|
|                          |    |                                                                                                                                                                                                           | 05-06                       |
| Background and rationale | 6a | Description of research question and justification for undertaking the trial, including summary of relevant studies (published and unpublished) examining benefits and harms for each intervention        | <u>                    </u> |
|                          | 6b | Explanation for choice of comparators                                                                                                                                                                     | 05-06                       |
| Objectives               | 7  | Specific objectives or hypotheses                                                                                                                                                                         | <u>07</u>                   |
| Trial design             | 8  | Description of trial design including type of trial (eg, parallel group, crossover, factorial, single group), allocation ratio, and framework (eg, superiority, equivalence, noninferiority, exploratory) | <u>07-08</u>                |

**Methods: Participants, interventions, and outcomes**

|                      |     |                                                                                                                                                                                                                                                                                                                                                                                |                  |
|----------------------|-----|--------------------------------------------------------------------------------------------------------------------------------------------------------------------------------------------------------------------------------------------------------------------------------------------------------------------------------------------------------------------------------|------------------|
| Study setting        | 9   | Description of study settings (eg, community clinic, academic hospital) and list of countries where data will be collected. Reference to where list of study sites can be obtained                                                                                                                                                                                             | <u>08</u>        |
| Eligibility criteria | 10  | Inclusion and exclusion criteria for participants. If applicable, eligibility criteria for study centres and individuals who will perform the interventions (eg, surgeons, psychotherapists)                                                                                                                                                                                   | <u>07</u>        |
| Interventions        | 11a | Interventions for each group with sufficient detail to allow replication, including how and when they will be administered                                                                                                                                                                                                                                                     | <u>12-13-14</u>  |
|                      | 11b | Criteria for discontinuing or modifying allocated interventions for a given trial participant (eg, drug dose change in response to harms, participant request, or improving/worsening disease)                                                                                                                                                                                 | <u>NA</u>        |
|                      | 11c | Strategies to improve adherence to intervention protocols, and any procedures for monitoring adherence (eg, drug tablet return, laboratory tests)                                                                                                                                                                                                                              | <u>NA</u>        |
| Outcomes             | 11d | Relevant concomitant care and interventions that are permitted or prohibited during the trial                                                                                                                                                                                                                                                                                  | <u>NA</u>        |
|                      | 12  | Primary, secondary, and other outcomes, including the specific measurement variable (eg, systolic blood pressure), analysis metric (eg, change from baseline, final value, time to event), method of aggregation (eg, median, proportion), and time point for each outcome. Explanation of the clinical relevance of chosen efficacy and harm outcomes is strongly recommended | <u>12-13</u>     |
| Participant timeline | 13  | Time schedule of enrolment, interventions (including any run-ins and washouts), assessments, and visits for participants. A schematic diagram is highly recommended (see Figure)                                                                                                                                                                                               | <u>08-09 -10</u> |

1  
2  
3 Sample size 14 Estimated number of participants needed to achieve study objectives and how it was determined, including 08  
4 clinical and statistical assumptions supporting any sample size calculations

5  
6 Recruitment 15 Strategies for achieving adequate participant enrolment to reach target sample size 08  
7

8 **Methods: Assignment of interventions (for controlled trials)**  
9

10 Allocation:

11  
12 Sequence generation 16a Method of generating the allocation sequence (eg, computer-generated random numbers), and list of any 08  
13 factors for stratification. To reduce predictability of a random sequence, details of any planned restriction  
14 (eg, blocking) should be provided in a separate document that is unavailable to those who enrol participants  
15 or assign interventions

16  
17 Allocation concealment mechanism 16b Mechanism of implementing the allocation sequence (eg, central telephone; sequentially numbered, 08  
18 opaque, sealed envelopes), describing any steps to conceal the sequence until interventions are assigned  
19

20 Implementation 16c Who will generate the allocation sequence, who will enrol participants, and who will assign participants to 08  
21 interventions

22 Blinding (masking) 17a Who will be blinded after assignment to interventions (eg, trial participants, care providers, outcome 08  
23 assessors, data analysts), and how  
24

25  
26 17b If blinded, circumstances under which unblinding is permissible, and procedure for revealing a participant's 08  
27 allocated intervention during the trial  
28  
29  
30  
31

32 **Methods: Data collection, management, and analysis**  
33

34 Data collection methods 18a Plans for assessment and collection of outcome, baseline, and other trial data, including any related 08-14  
35 processes to promote data quality (eg, duplicate measurements, training of assessors) and a description of  
36 study instruments (eg, questionnaires, laboratory tests) along with their reliability and validity, if known.  
37 Reference to where data collection forms can be found, if not in the protocol  
38

39 18b Plans to promote participant retention and complete follow-up, including list of any outcome data to be 08-09  
40 collected for participants who discontinue or deviate from intervention protocols  
41  
42  
43  
44  
45

|    |                                 |     |                                                                                                                                                                                                                                                                                                                                       |           |
|----|---------------------------------|-----|---------------------------------------------------------------------------------------------------------------------------------------------------------------------------------------------------------------------------------------------------------------------------------------------------------------------------------------|-----------|
| 1  |                                 |     |                                                                                                                                                                                                                                                                                                                                       |           |
| 2  |                                 |     |                                                                                                                                                                                                                                                                                                                                       |           |
| 3  | Data management                 | 19  | Plans for data entry, coding, security, and storage, including any related processes to promote data quality (eg, double data entry; range checks for data values). Reference to where details of data management procedures can be found, if not in the protocol                                                                     | <u>14</u> |
| 4  |                                 |     |                                                                                                                                                                                                                                                                                                                                       |           |
| 5  |                                 |     |                                                                                                                                                                                                                                                                                                                                       |           |
| 6  |                                 |     |                                                                                                                                                                                                                                                                                                                                       |           |
| 7  | Statistical methods             | 20a | Statistical methods for analysing primary and secondary outcomes. Reference to where other details of the statistical analysis plan can be found, if not in the protocol                                                                                                                                                              | <u>14</u> |
| 8  |                                 |     |                                                                                                                                                                                                                                                                                                                                       |           |
| 9  |                                 |     |                                                                                                                                                                                                                                                                                                                                       |           |
| 10 |                                 | 20b | Methods for any additional analyses (eg, subgroup and adjusted analyses)                                                                                                                                                                                                                                                              | <u>NA</u> |
| 11 |                                 |     |                                                                                                                                                                                                                                                                                                                                       |           |
| 12 |                                 | 20c | Definition of analysis population relating to protocol non-adherence (eg, as randomised analysis), and any statistical methods to handle missing data (eg, multiple imputation)                                                                                                                                                       | <u>NA</u> |
| 13 |                                 |     |                                                                                                                                                                                                                                                                                                                                       |           |
| 14 |                                 |     |                                                                                                                                                                                                                                                                                                                                       |           |
| 15 |                                 |     |                                                                                                                                                                                                                                                                                                                                       |           |
| 16 | <b>Methods: Monitoring</b>      |     |                                                                                                                                                                                                                                                                                                                                       |           |
| 17 |                                 |     |                                                                                                                                                                                                                                                                                                                                       |           |
| 18 | Data monitoring                 | 21a | Composition of data monitoring committee (DMC); summary of its role and reporting structure; statement of whether it is independent from the sponsor and competing interests; and reference to where further details about its charter can be found, if not in the protocol. Alternatively, an explanation of why a DMC is not needed | <u>NA</u> |
| 19 |                                 |     |                                                                                                                                                                                                                                                                                                                                       |           |
| 20 |                                 |     |                                                                                                                                                                                                                                                                                                                                       |           |
| 21 |                                 |     |                                                                                                                                                                                                                                                                                                                                       |           |
| 22 |                                 |     |                                                                                                                                                                                                                                                                                                                                       |           |
| 23 |                                 | 21b | Description of any interim analyses and stopping guidelines, including who will have access to these interim results and make the final decision to terminate the trial                                                                                                                                                               | <u>NA</u> |
| 24 |                                 |     |                                                                                                                                                                                                                                                                                                                                       |           |
| 25 |                                 |     |                                                                                                                                                                                                                                                                                                                                       |           |
| 26 | Harms                           | 22  | Plans for collecting, assessing, reporting, and managing solicited and spontaneously reported adverse events and other unintended effects of trial interventions or trial conduct                                                                                                                                                     | <u>09</u> |
| 27 |                                 |     |                                                                                                                                                                                                                                                                                                                                       |           |
| 28 |                                 |     |                                                                                                                                                                                                                                                                                                                                       |           |
| 29 | Auditing                        | 23  | Frequency and procedures for auditing trial conduct, if any, and whether the process will be independent from investigators and the sponsor                                                                                                                                                                                           | <u>NA</u> |
| 30 |                                 |     |                                                                                                                                                                                                                                                                                                                                       |           |
| 31 |                                 |     |                                                                                                                                                                                                                                                                                                                                       |           |
| 32 |                                 |     |                                                                                                                                                                                                                                                                                                                                       |           |
| 33 | <b>Ethics and dissemination</b> |     |                                                                                                                                                                                                                                                                                                                                       |           |
| 34 |                                 |     |                                                                                                                                                                                                                                                                                                                                       |           |
| 35 | Research ethics approval        | 24  | Plans for seeking research ethics committee/institutional review board (REC/IRB) approval                                                                                                                                                                                                                                             | <u>13</u> |
| 36 |                                 |     |                                                                                                                                                                                                                                                                                                                                       |           |
| 37 |                                 |     |                                                                                                                                                                                                                                                                                                                                       |           |
| 38 | Protocol amendments             | 25  | Plans for communicating important protocol modifications (eg, changes to eligibility criteria, outcomes, analyses) to relevant parties (eg, investigators, REC/IRBs, trial participants, trial registries, journals, regulators)                                                                                                      | <u>NA</u> |
| 39 |                                 |     |                                                                                                                                                                                                                                                                                                                                       |           |
| 40 |                                 |     |                                                                                                                                                                                                                                                                                                                                       |           |
| 41 |                                 |     |                                                                                                                                                                                                                                                                                                                                       |           |
| 42 |                                 |     |                                                                                                                                                                                                                                                                                                                                       |           |
| 43 |                                 |     |                                                                                                                                                                                                                                                                                                                                       |           |
| 44 |                                 |     |                                                                                                                                                                                                                                                                                                                                       |           |
| 45 |                                 |     |                                                                                                                                                                                                                                                                                                                                       |           |
| 46 |                                 |     |                                                                                                                                                                                                                                                                                                                                       |           |
| 47 |                                 |     |                                                                                                                                                                                                                                                                                                                                       |           |
| 48 |                                 |     |                                                                                                                                                                                                                                                                                                                                       |           |
| 49 |                                 |     |                                                                                                                                                                                                                                                                                                                                       |           |

|    |                               |     |                                                                                                                                                                                                                                                                                     |              |
|----|-------------------------------|-----|-------------------------------------------------------------------------------------------------------------------------------------------------------------------------------------------------------------------------------------------------------------------------------------|--------------|
| 1  |                               |     |                                                                                                                                                                                                                                                                                     |              |
| 2  |                               |     |                                                                                                                                                                                                                                                                                     |              |
| 3  | Consent or assent             | 26a | Who will obtain informed consent or assent from potential trial participants or authorised surrogates, and how (see Item 32)                                                                                                                                                        | <u>13</u>    |
| 4  |                               |     |                                                                                                                                                                                                                                                                                     |              |
| 5  |                               |     |                                                                                                                                                                                                                                                                                     |              |
| 6  |                               | 26b | Additional consent provisions for collection and use of participant data and biological specimens in ancillary studies, if applicable                                                                                                                                               | <u>NA</u>    |
| 7  |                               |     |                                                                                                                                                                                                                                                                                     |              |
| 8  |                               |     |                                                                                                                                                                                                                                                                                     |              |
| 9  | Confidentiality               | 27  | How personal information about potential and enrolled participants will be collected, shared, and maintained in order to protect confidentiality before, during, and after the trial                                                                                                | <u>13</u>    |
| 10 |                               |     |                                                                                                                                                                                                                                                                                     |              |
| 11 |                               |     |                                                                                                                                                                                                                                                                                     |              |
| 12 | Declaration of interests      | 28  | Financial and other competing interests for principal investigators for the overall trial and each study site                                                                                                                                                                       | <u>03-14</u> |
| 13 |                               |     |                                                                                                                                                                                                                                                                                     |              |
| 14 |                               |     |                                                                                                                                                                                                                                                                                     |              |
| 15 | Access to data                | 29  | Statement of who will have access to the final trial dataset, and disclosure of contractual agreements that limit such access for investigators                                                                                                                                     | <u>14</u>    |
| 16 |                               |     |                                                                                                                                                                                                                                                                                     |              |
| 17 |                               |     |                                                                                                                                                                                                                                                                                     |              |
| 18 | Ancillary and post-trial care | 30  | Provisions, if any, for ancillary and post-trial care, and for compensation to those who suffer harm from trial participation                                                                                                                                                       | <u>NA</u>    |
| 19 |                               |     |                                                                                                                                                                                                                                                                                     |              |
| 20 |                               |     |                                                                                                                                                                                                                                                                                     |              |
| 21 | Dissemination policy          | 31a | Plans for investigators and sponsor to communicate trial results to participants, healthcare professionals, the public, and other relevant groups (eg, via publication, reporting in results databases, or other data sharing arrangements), including any publication restrictions | <u>13</u>    |
| 22 |                               |     |                                                                                                                                                                                                                                                                                     |              |
| 23 |                               |     |                                                                                                                                                                                                                                                                                     |              |
| 24 |                               |     |                                                                                                                                                                                                                                                                                     |              |
| 25 |                               |     |                                                                                                                                                                                                                                                                                     |              |
| 26 |                               | 31b | Authorship eligibility guidelines and any intended use of professional writers                                                                                                                                                                                                      | <u>14</u>    |
| 27 |                               |     |                                                                                                                                                                                                                                                                                     |              |
| 28 |                               | 31c | Plans, if any, for granting public access to the full protocol, participant-level dataset, and statistical code                                                                                                                                                                     | <u>NA</u>    |
| 29 |                               |     |                                                                                                                                                                                                                                                                                     |              |
| 30 | <b>Appendices</b>             |     |                                                                                                                                                                                                                                                                                     |              |
| 31 |                               |     |                                                                                                                                                                                                                                                                                     |              |
| 32 | Informed consent materials    | 32  | Model consent form and other related documentation given to participants and authorised surrogates                                                                                                                                                                                  | <u>13</u>    |
| 33 |                               |     |                                                                                                                                                                                                                                                                                     |              |
| 34 |                               |     |                                                                                                                                                                                                                                                                                     |              |
| 35 | Biological specimens          | 33  | Plans for collection, laboratory evaluation, and storage of biological specimens for genetic or molecular analysis in the current trial and for future use in ancillary studies, if applicable                                                                                      | <u>NA</u>    |
| 36 |                               |     |                                                                                                                                                                                                                                                                                     |              |
| 37 |                               |     |                                                                                                                                                                                                                                                                                     |              |

\*It is strongly recommended that this checklist be read in conjunction with the SPIRIT 2013 Explanation & Elaboration for important clarification on the items. Amendments to the protocol should be tracked and dated. The SPIRIT checklist is copyrighted by the SPIRIT Group under the Creative Commons "[Attribution-NonCommercial-NoDerivs 3.0 Unported](https://creativecommons.org/licenses/by-nc-nd/3.0/)" license.

# BMJ Open

**Protocol study for a randomized, controlled, double-blind, clinical trial involving virtual reality and anodal transcranial direct current stimulation for the improvement of upper limb motor function in children with Down syndrome**

|                                 |                                                                                                                                                                                                                                                                                                                                                                                                                                                                                                                                                                                         |
|---------------------------------|-----------------------------------------------------------------------------------------------------------------------------------------------------------------------------------------------------------------------------------------------------------------------------------------------------------------------------------------------------------------------------------------------------------------------------------------------------------------------------------------------------------------------------------------------------------------------------------------|
| Journal:                        | <i>BMJ Open</i>                                                                                                                                                                                                                                                                                                                                                                                                                                                                                                                                                                         |
| Manuscript ID                   | bmjopen-2017-016260.R1                                                                                                                                                                                                                                                                                                                                                                                                                                                                                                                                                                  |
| Article Type:                   | Protocol                                                                                                                                                                                                                                                                                                                                                                                                                                                                                                                                                                                |
| Date Submitted by the Author:   | 31-May-2017                                                                                                                                                                                                                                                                                                                                                                                                                                                                                                                                                                             |
| Complete List of Authors:       | Lopes, Jamile; Universidade Nove de Julho, Grecco, Luanda<br>Moura, Renata; Universidade Nove de Julho<br>Lazzari, Roberta; Universidade Nove de Julho, Movement Analysis Lab<br>Duarte, Natalia<br>Miziara, Isabela ; Universidade Federal de Uberlandia, ucleus of Assistive Technologies (NTA) and Biomedical Engineering Laboratory (Biolab)<br>melo, Gileno Edu; Universidade do Estado do Para, Desporto; Universidade Nove de Julho,<br>Dumont, Arislander; Universidade Nove de Julho<br>Galli, Manuela; Politecnico di Milano,<br>Santos Oliveira, C; Nove de Julho University |
| <b>Primary Subject Heading</b>: | Neurology                                                                                                                                                                                                                                                                                                                                                                                                                                                                                                                                                                               |
| Secondary Subject Heading:      | Global health                                                                                                                                                                                                                                                                                                                                                                                                                                                                                                                                                                           |
| Keywords:                       | Down syndrome, transcranial direct current stimulation, upper limb.                                                                                                                                                                                                                                                                                                                                                                                                                                                                                                                     |
|                                 |                                                                                                                                                                                                                                                                                                                                                                                                                                                                                                                                                                                         |

SCHOLARONE™  
Manuscripts

1  
2  
3 **Protocol study for a randomized, controlled, double-blind, clinical trial involving**  
4 **virtual reality and anodal transcranial direct current stimulation for the improvement**  
5 **of upper limb motor function in children with Down syndrome**  
6  
7

8 Jamile Benite Palma Lopes<sup>1</sup>, Luanda André Collange Grecco<sup>2</sup>, Renata Calhes  
9 Franco de Moura<sup>1</sup>, Roberta Delasta Lazzari<sup>1</sup>, Natalia de Almeida Carvalho Duarte<sup>1</sup>, Isabela  
10 Miziara<sup>3</sup>, Gileno Edu Lameira de Melo<sup>1</sup>, Arislander Jonathan Lopes Dumont<sup>1</sup>, Manuela  
11 Galli<sup>4</sup>, Claudia Santos Oliveira<sup>5</sup>  
12  
13

14  
15 <sup>1</sup> Doctoral and Master Programs in Rehabilitation Sciences, Movement Analysis  
16 Lab, University Nove de Julho, Avenue Francisco Matarazzo, 612. 05001-000. São  
17 Paulo, São Paulo, Brazil. Email: [jamilepalma@yahoo.com.br](mailto:jamilepalma@yahoo.com.br),  
18 [robertalazzari@hotmail.com](mailto:robertalazzari@hotmail.com), [natycarvalho\\_fisio@hotmail.com](mailto:natycarvalho_fisio@hotmail.com),  
19 [gilenouepa@yahoo.com.br](mailto:gilenouepa@yahoo.com.br), [arislanderlg@gmail.com](mailto:arislanderlg@gmail.com) [franco.renata@terra.com.br](mailto:franco.renata@terra.com.br),  
20  
21  
22  
23

24 <sup>2</sup> Center of Pediatric Neurosurgery - CENEPE-Rehabilitation, Avenue Dr. Veiga  
25 Filho,350.Cj 604. 01229-001. São Paulo - SP, Brazil and Post Doctoral student, NANI –  
26 Educação e Saúde na Infância e Adolescência, Unifesp, São Paulo - SP, Brazil. (+55 11  
27 2528-2893). Email: [luandacollange@hotmail.com](mailto:luandacollange@hotmail.com)  
28  
29  
30  
31

32 <sup>3</sup> Doctoral Postgraduate Program in Electrical Engineering, Nucleus of Assistive  
33 Technologies (NTA) and Biomedical Engineering Laboratory (Biolab), Faculty of  
34 Electrical Engineering, Federal University of Uberlândia, UFU, Uberlândia - MG, Brazil  
35 [isabelammiziara@gmail.com](mailto:isabelammiziara@gmail.com)  
36  
37  
38

39 <sup>4</sup> Department of Electronic Information and Bioengineering, Politecnico di Milano,  
40 Milan, Italy and IRCCS San Raffaele Pisana, Rome, Italy. Via Giuseppe Colombo, 40,  
41 20133, Italy (+39 0223993338). Email: [manuela.galli@polimi.it](mailto:manuela.galli@polimi.it)  
42  
43  
44

45 <sup>5</sup> Professor, Master and Doctoral Programs in Rehabilitation Sciences, Movement  
46 Analysis Lab, University Nove de Julho, Avenida Francisco Matarazzo, 612. 05001-000.  
47 São Paulo, São Paulo, Brazil. Email: [csantos@uninove.br](mailto:csantos@uninove.br)  
48  
49  
50  
51  
52  
53  
54  
55  
56  
57  
58  
59  
60

**Authors' contributions**

All authors made substantial contributions.

Conceived and designed the experiments: JL LG RC HL ND IM GM AD MG CO.

Acquisition of data: JL LG RC HL ND IM GM AD MG CO. Interpretation of data: JL LG

RC HL ND IM GM AD MG CO. Contributed analysis tools: JL LG RC HL ND IM GM

AD MG CO Wrote the paper: JL LG RC HL ND IM GM AD MG CO. Final approval of

the version: JL LG RC HL ND IM GM AD MG CO

**Corresponding author:**

Cláudia Santos Oliveira

Address: Rua Itapicuru, 380. Apto:111.

Perdizes. CEP: 05006-000, São Paulo, Brazil

The study received approval from the ethics committee of University Nove de Julho (Sao Paulo, Brazil) under protocol number 1.540.113 and is registered with the Brazilian Registry of Clinical Trials (RBR3PHPXB)

**The authors declare that there are no additional unpublished data from the study.**

**Word count: 5600**

## Abstract

**Introduction:** Down syndrome results in neuromotor impairment that affects selective motor control, compromising the acquisition of motor skills and functional independence. The aim of the proposed study is to evaluate and compare the effects of multiple-monopolar anodal transcranial direct current stimulation and sham stimulation over the primary motor cortex during upper limb motor training involving virtual reality on motor control, muscle activity, cerebral activity, and functional independence. **Methods and Analysis:** A randomized, controlled, double-blind, clinical trial is proposed. The calculation of the sample size will be defined based on the results of a pilot study involving the same methods. The participants will be randomly allocated to two groups. Evaluations will be conducted before and after the intervention as well as one month after the end of the intervention process. At each evaluation, three-dimensional, analysis of upper limb movement muscle activity will be measured using electromyography, cerebral activity will be measured using an electroencephalogram system, and intellectual capacity will be assessed using the Wechsler Intelligence Scale for Children. Virtual reality training will be performed three times a week (one 20-minute session per day) for a total of ten sessions. During the protocol, transcranial stimulation will be administered concomitantly to upper limb motor training. The results will be analyzed statistically, with a p-value  $\leq 0.05$  considered indicative of statistical significance. **Ethical aspects and publicity:** The present study received approval from the Institutional Review Board of *Universidade Nove de Julho* (Sao Paulo, Brazil) under process number 1.540.113 and is registered with the Brazilian Registry of Clinical Trials (N<sup>o</sup> RBR3PHPXB). The participating institutions have presented a declaration of participation. The volunteers will be permitted to drop out of the study at any time with no negative repercussions. The results will be published and will contribute evidence regarding the use of this type of intervention on children.

**Keywords:** Down syndrome; transcranial direct current stimulation; upper limb.



### Strengths and limitations of this study

The proposed project involves the combination of virtual reality (RV) activities for upper limb motor training and multiple-monopolar anodal transcranial direct current stimulation (tDCS) over the primary motor cortex with the aim of optimizing motor control and upper limb function in children with Down syndrome (DS).

1. Adequate upper limb motor control enables individuals to perform daily, functional, and academic activities in an independent fashion.
2. The use of RV activities to improve motor control is a promising therapeutic resource that has demonstrated satisfactory results in the scientific literature, including for individuals with DS.
3. Non-invasive brain stimulation techniques, specifically tDCS, are currently considered effective means to facilitate motor cortical excitability of brain regions underlying the stimulation electrode, leading to improvements in motor control and motor learning. Despite the lack of reports on the effects of transcranial stimulation in children with DS, studies involving pediatric patients have demonstrated that the technique is safe, with little or no adverse effects.
4. We believe that the administration of multiple-monopolar anodal transcranial direct current stimulation over the primary motor cortex, specifically the areas that correspond to upper limb motor control (C3 and C4 of the 10-20 electroencephalogram system) during upper limb motor training with the use of VR activities will enhance the cortical excitability of motor regions and optimize cerebral activity, thereby potentiating the effects of upper limb motor therapy.
5. The literature reports positive effects with the use of tDCS on upper limb movements in children with cerebral palsy. Optimizing such movements has a direct impact on improving one's performance of activities of daily living and functional independence. However, no scientific data were found regarding the use of tDCS during upper limb training in the population of the proposed study

1 (children with DS).

- 2
- 3 6. The literature also reports promising results with the use of VR regarding
- 4 improvements in cognitive aspects of the population in question, as this
- 5 intervention constitutes multisensory therapy that optimizes one's concentration
- 6 and assists in the anticipation of movements, thereby exerting an impact on
- 7 learning aspects in children submitted to this intervention.
- 8
- 9
- 10
- 11
- 12
- 13
- 14 7. The limitations of the proposed study regard the lack of scientific data from
- 15 previous studies involving children with DS for the purposes of comparison with
- 16 the findings obtained in the proposed study. However, this aspect also
- 17 demonstrates the importance of the data that will be generated in the proposed
- 18 study.
- 19
- 20
- 21
- 22
- 23
- 24
- 25
- 26
- 27
- 28
- 29
- 30
- 31
- 32
- 33
- 34
- 35
- 36
- 37
- 38
- 39
- 40
- 41
- 42
- 43
- 44
- 45
- 46
- 47
- 48
- 49
- 50
- 51
- 52
- 53
- 54
- 55
- 56
- 57
- 58
- 59
- 60

## 1. INTRODUCTION

Down syndrome (DS) is a highly prevalent genetic disease caused by the inheritance of an additional chromosome 21 and is one of the most frequent causes of mental impairment, affecting approximately 20% of the total number of individuals with mental disability.<sup>[1]</sup> The incidence in the United States is one out of every 700 births and it is estimated that at least 100 thousand individuals in Brazil are diagnosed with the syndrome.<sup>[2-4]</sup>

Structural and functional abnormalities are found in the nervous system of children with DS. Diffuse brain damage and peculiar electrical functioning during cognitive development result in poor analysis, synthesis, and speech skills. Moreover, such children demonstrate difficulties in selecting and directing a stimulus due to the fatigue of the connections. These abnormalities result in neurological disorders that vary in terms of manifestation and intensity.<sup>[5]</sup>

According to Flórez and Troncoso (1997), the brain of individuals with DS is smaller in volume in comparison to individuals without this condition. Hypoplasia of the frontal and occipital lobes is a common finding. A unilateral or bilateral reduction in the temporal lobe occurs in up to 50% of cases and reductions in the corpus callosum, anterior commissure, and hippocampus are found.<sup>[6-7]</sup> Such individuals also have a smaller number of secondary sulci in comparison to individuals without this syndrome, the temporal gyri are underdeveloped and differences in nerve cells are also reported. For instance, Pandilla (1976) reports differences in the axons and dendrites of pyramidal neurons in the motor cortex.<sup>[8]</sup> Such differences are highly correlated with fragmentation problems and necrosis of these branches as well as differences in the electrical activity of the brain.<sup>[9]</sup> This problem leads to limitations with regard to synaptic connections and the neural transmission of nerve impulses.

The literature also reports atrophied nerve cells, which are likely associated with lags

For peer review only - <http://bmjopen.bmj.com/site/about/guidelines.xhtml>  
during the integration of visual and spatial information. According to Block (1991),

1 individuals with DS also have a smaller cerebellum and base ganglia, which are related to  
2 the control of coordination, timing, and balance. Such problems imply limitations with  
3 regard to the acquisition of motor skills.<sup>[10]</sup> According to Bomono & Rosetti (2010),  
4 neuromotor abnormalities in DS include hypotonia, diminished primitive reflexes, delayed  
5 motor and cognitive development, and lower levels of learning.<sup>[11]</sup>

6  
7  
8  
9  
10  
11  
12 Seaman and DePauw (1982) propose a model in which reaching phases of  
13 fundamental movements and culturally determined movements is conditioned by the  
14 achievement of previous development phases.<sup>[9]</sup> As this population exhibits problems with  
15 regard to systems of early-onset and late-onset maturation, children with DS could  
16 encounter difficulties reaching the phase of sensory-motor responses and even acquiring  
17 motor skills. According to Connolly (1970), the mechanisms or systems that offer support  
18 to development and the acquisition of motor skills can be understood using the concepts of  
19 “hardware” and “software”, in which changes in “hardware” regard structure, such as the  
20 myelinization that occurs in axons, whereas changes in “software” regard function, such as  
21 a gain in information processing speed as a result of myelinization; thus, individuals with  
22 DS have problems with their “hardware” that have repercussions on their “software”.<sup>[12]</sup>  
23 “Hardware” problems lead to limitations with regard to physical and motor aspects, which  
24 is an important problem, as both physical proficiency and perceptive-motor proficiency  
25 contribute to the acquisition and performance of motor skills. In other words, it is possible  
26 that problems with balance, timing, and agility constitute a hindrance to the acquisition of  
27 fundamental patterns or specialized skills.<sup>[13]</sup>

28  
29  
30  
31  
32  
33  
34  
35  
36  
37  
38  
39  
40  
41  
42  
43  
44  
45  
46  
47  
48  
49  
50  
51  
52  
53  
54  
55  
56  
57  
58  
59  
60  
The population with DS exhibits abnormal muscle coordination, difficulty processing  
sensory information and functional limitations. The upper limb dysfunctions in this  
population (muscle weakness and hypotonus, slow reflexes, abnormal biomechanics,  
sensory deficiency) exert a negative impact on the performance of activities of daily  
living, independence and quality of life.<sup>[14]</sup>

Studies have been conducted to understand why individuals with DS have slow,  
unharmonious movements.<sup>[15,26]</sup> The investigation of electromyographic activity and

8  
1 muscle torque demonstrates this deficiency, which can be corrected by the repetition of a  
2  
3 given movement during motor training activities. Motor control strategies used in the  
4  
5 execution of complex activities, such as a reaching task, have been investigated in this  
6  
7 population.<sup>[15-25]</sup>  
8  
9

10  
11 The positive results achieved with virtual reality (VR) are believed to be related  
12  
13 to training in an interactive environment that provides a broad range of activities and  
14  
15 scenarios with multiple sensory channels, enabling the creation of exercises at an intensity  
16  
17 that is promising for the needs of individuals with DS.<sup>[26-28]</sup> VR can be used as an  
18  
19 auxiliary tool involving a playful, motivational objective that can facilitate the  
20  
21 development of perceptions and motor skills through the training of planning skills and  
22  
23 motor control as well as stimulation of the plasticity of the central nervous system.<sup>[ 27-28]</sup>  
24  
25

26  
27 Non-invasive brain stimulation methods have been employed in physical rehabilitation  
28  
29 protocols due to the promising results achieved with regard to motor learning.<sup>[29-30]</sup>  
30  
31 Transcranial direct current stimulation (tDCS) is a relatively low-cost, noninvasive brain  
32  
33 stimulation technique that is easy to administer and offers minimal adverse effects. This  
34  
35 method is known to produce lasting changes in motor cortical excitability.<sup>[31]</sup> Cortical  
36  
37 modulation depends on the polarity of the current: anodal stimulation increases cortical  
38  
39 excitability, favoring the depolarization of the neuronal membrane, whereas cathodal  
40  
41 stimulation has an inhibitory effect due to the hyperpolarization of the neuronal  
42  
43 membrane.<sup>[31-36]</sup>  
44  
45

46  
47 TDCS has advantages over other transcranial stimulation techniques, such as  
48  
49 providing a longer lasting modulatory effect on cortical function as well as its ease of use  
50  
51 and lower cost. The results of clinical trials have demonstrated its considerable potential in  
52  
53 the treatment of neurological disorders and the investigation of processes of cortical  
54  
55 excitability modulation. Moreover, this type of intervention offers a better condition for  
56  
57 sham stimulation, which confers greater specificity to the findings.<sup>[37-40]</sup> In the rehabilitation  
58  
59 process, the aim of neuromodulating techniques is to enhance local synaptic efficiency and  
60

For peer review only - <http://bmjopen.bmj.com/site/about/guidelines.xhtml>  
alter the maladaptive plasticity pattern that emerges after a cortical injury.<sup>[41-45]</sup>

1 Although DS is one of the most prevalent diseases in the pediatric population, no  
2  
3 studies were found on the effects of tDCS on children with this syndrome. Thus, the lack of  
4  
5 investigations on anodal tDCS over the primary motor cortex during motor training for  
6  
7 children with DS constitutes a gap in the scientific literature.<sup>[46]</sup> Considering the high  
8  
9 prevalence of DS, the motor limitations stemming from this disease, which exert a negative  
10  
11 impact on functionality and independence, and the fact that tDCS is not contraindicated in  
12  
13 most cases of this syndrome, the investigation of the effects of this noninvasive brain  
14  
15 stimulation technique on children with DS is relevant.<sup>[43-45]</sup>  
16  
17

18  
19 The proposed study could be used as the basis for the development of further projects  
20  
21 conducted to broaden knowledge on this technique, enabling a novel intervention option for  
22  
23 the optimization of motor training in individuals with DS.  
24  
25  
26  
27  
28  
29  
30  
31  
32  
33  
34  
35  
36  
37  
38  
39  
40  
41  
42  
43  
44  
45  
46  
47  
48  
49  
50  
51  
52  
53  
54  
55  
56  
57  
58  
59  
60

## 2. OBJECTIVES

### 2.1 Primary objective

The aim of the proposed study is to evaluate and compare the effect of multiple-monopolar anodal tDCS and sham stimulation over the primary motor cortex during upper limb motor training involving virtual reality on motor control (spatiotemporal variables and kinematics of a reaching task), activity of the elbow flexors and extensors, cerebral activity and functional independence in children with DS.

#### 2.1.1 HYPOTHESES

**Null hypothesis:** Ten sessions of anodal transcranial direct current stimulation over the motor cortex concomitantly to upper limb motor training involving the use of virtual reality activities will result in the same effects as motor training with the use of virtual reality combined with sham transcranial stimulation in children with Down syndrome.

**Alternative hypothesis:** Ten sessions of anodal transcranial direct current stimulation over the motor cortex concomitantly to upper limb motor training involving the use of virtual reality activities will result in the better effects than motor training with the use of virtual reality combined with sham transcranial stimulation in children with Down syndrome.

### 2.2 Secondary objectives

- Determine possible correlations between upper limb motor control (movement velocity and total duration of movement) and muscle activity (elbow flexors and extensors), cerebral activity (activity of the parietal lobe, specifically regions C3 and C4) and functional independence with regard to self-care.

- Identify possible prediction factors for the response of upper limb motor control (movement velocity and total duration of movement) in children with DS. Muscle activity of elbow flexors and extensors, cerebral activity (areas C3 and C4 of the 10-20 electroencephalogram system) and transcranial direct current stimulation (active and sham) will be the factors investigated.

### 3. METHODS AND ANALYSIS

The sample will be composed of children with DS recruited from the physical therapy clinics of *Universidade Nove de Julho*, São Paulo, Brazil. Letters and emails will be sent to pediatricians, physiotherapists and pediatric neurologists to divulge the study. The following will be the inclusion criteria: 1) a diagnosis of DS; 2) adequate comprehension and cooperation during the procedures; 3) age six to 12 years; 4) compromised upper limb motor coordination; and 5) statement of informed consent signed by a legal guardian. The exclusion criteria will be 1) having undergone surgical procedures in the 12 months prior to the onset of the training sessions, 2) orthopedic deformity of the lower limbs or spinal column with an indication for surgery, 3) epilepsy, 4) metal implant in skull or hearing aids, 5) associated neurological disorder, and 6) use of a pacemaker.

#### 3.1 Study Design

A Phase I-II study will be conducted (figure 1): analytical, paired, randomized, controlled, double-blind, clinical trial.

#### 3.2 Sample size

The sample size will be calculated based on the results of a pilot study with the same methods as those of the main study. The pilot study will involve ten children randomly allocated to the experimental and control groups (five children in each group). The sample size will be calculated based on the mean of both groups considering total duration of movement as the primary outcome, with a unidirectional alpha of 0.05 and an 80% power. The sample will be increased by 20% to compensate for possible dropouts.

#### 3.3 Randomization

Patients with DS who meet the eligibility criteria and agree to participate in the study will be submitted to an initial evaluation and will then be randomly allocated to two groups using a randomization method available at the site [www.randomizacion.com](http://www.randomizacion.com). This process will be performed by a member of the research team who is not involved in the recruitment or development of the study. During the protocol, the blinding of the main researcher will be ensured with the use of the DC-Stimulator (NeuroConn, Germany), which has active and sham modes that function based on encrypted code, with three configurations to choose so that the more complex conditions of the study can be achieved. The parameters are adjusted individually and the activated mode can only be altered by the programmer.



1  
2  
3  
4  
5  
6  
7  
8  
9  
10  
11  
12  
13  
14  
15  
16  
17  
18  
19  
20  
21  
22  
23  
24  
25  
26  
27  
28  
29  
30  
31  
32  
33  
34  
35  
36  
37  
38  
39  
40  
41  
42  
43  
44  
45  
46  
47  
48  
49  
50  
51  
52  
53  
54  
55  
56  
57  
58  
59  
60

Experimental group: multiple-monopolar anodal tDCS over the primary motor cortex bilaterally combined with upper limb motor training involving the use of VR;

Control group: sham tDCS over the primary motor cortex bilaterally combined with upper limb motor training involving the use of VR.

### 3.4 Evaluations

The participants will be submitted to three evaluations: Pre-intervention, post-evaluation (after ten training sessions), and follow up (one month after last training session).

#### 3.4.1 Three-dimensional movement analysis:

Three-dimensional analysis of upper limb movement: the kinematics of upper limb movement will be evaluated using the SMART-D 140® system (BTS, Milan, Italy), with eight cameras sensitive to infrared light, a sampling frequency of 100 Hz and video system synchronized with the SMART-D system. Passive markers will be positioned at anatomic references points directly on the skin with specific adhesive tape, following the protocol of the *SMARTup: The experimental setup* (figure 2).<sup>[47-49]</sup> A total of 18 markers measuring 15 mm in diameter will be used to identify the position of the head, trunk and upper limbs (upper arm, forearm and hand).

The movement will be divided into three phases: going phase (upper limb moving toward the target), adjusting phase (adjustment of arm to locate target precisely) and returning phase (return to initial position). At least six complete movements will be performed to obtain three adequate cycles for analysis (figure 3). The biomechanical model, filtering of the data, and processing of the variables will be performed using the *SMART analyser* software program (BTS, Milan, Italy). The variables will be identified and calculated for each movement cycle to evaluate any changes that occur after the intervention. The following variables will be considered, with the mean of the results used in the statistical analyses:

- Total duration of movement: total time required to perform the complete reaching task.
  - Mean movement velocity: computed during the going phase and determined using the marker positioned on the index finger.
  - Adjusting sway index: Defined as the length of the three-dimensional path described by the marker on the index finger during the adjusting phase.
  - Range of motion of elbow and shoulder: calculated as the difference between the maximum and minimum angles of the elbow and shoulder on the sagittal (elbow and shoulder) and frontal (shoulder) planes during the going phase, as described in the
- For peer review only - <http://bmjopen.bmj.com/site/about/guidelines.xhtml>

1 literature. [47-48]

2  
3  
4  
5  
6  
7 **3.4.2 Electromyographic (EMG) analysis:** Muscle activity during the reaching  
8 movement will be determined using EMG. The electrical activity resulting from the  
9 activation of the elbow flexors and extensors will be collected using an eight-channel  
10 electromyograph (FREEEMG<sup>®</sup>, BTS Engineering) with a bioelectrical signal amplifier,  
11 wireless data transmission and bipolar electrodes with a total gain of 2000 fold and  
12 frequency ranging from 20 to 450 Hz. Impedance and the common rejection mode ratio of  
13 the equipment are  $> 10^{15} \Omega/0.2 \text{ pF}$  and 60/10Hz 92 dB, respectively. The motor point of  
14 the muscles will be identified for the placement of the electrodes and the skin will be  
15 cleaned with 70% alcohol to reduce bioimpedance, following the recommendations of  
16 Surface Electromyography for the Non-Invasive Assessment of Muscles.<sup>[50]</sup> All EMG data  
17 will be digitized at 1000 frames per second using the BTS MYOLAB<sup>®</sup> software program.  
18 The data will be collected simultaneously to the kinematic data and both will be managed  
19 using the BTS<sup>®</sup> system and *Smart Capture*<sup>®</sup> software program.<sup>[51]</sup>

20  
21  
22  
23  
24  
25  
26  
27  
28  
29  
30 **3.4.3 Electroencephalographic analysis:** Brain activity will be investigated using  
31 electroencephalography (EEG), which will be performed during both the three-  
32 dimensional analysis of the reaching task and the evaluation of muscle activation using  
33 EMG. For such, the volunteer will be seated in an erect position on a chair in front of the  
34 table on which the reaching task will be performed. The BrainNet BNT36 device with 36  
35 configurable channels (32 AC and four DC) and a 16-bit analog-digital converter will be  
36 used for the acquisition of the EEG signal (figure 4). The analysis of the signal will be  
37 performed with the aid of the EEGLab tool implemented on Matlab, which is also  
38 capable of furnishing a topographic map of cerebral activity as a function of time. The  
39 electrodes will be positioned following the guidelines of the 10/20 electroencephalogram  
40 system (figure 5).<sup>[52,53]</sup>

41  
42  
43  
44  
45  
46  
47  
48  
49  
50  
51  
52 **3.4.5 Pediatric Evaluation of Disability Inventory (PEDI):** The children's functional  
53 performance will be assessed quantitatively using the PEDI, which is a questionnaire  
54 administered in interview format to a caregiver who can provide information regarding the  
55 child's performance on typical activities and routine tasks. The PEDI is composed of three  
56 parts, the first of which is used to evaluate skills grouped into three functional domains:  
57 self-care (73 items), mobility (59 items) and social function (65 items). Each item is scored  
58 either zero (not part of the child's repertoire) or 1 (part of the child's repertoire). The scores  
59  
60

1 are then totaled per domain.<sup>[55,56]</sup>  
2  
3  
4

5 **3.4.6 Wechsler Intelligence Scale for Children:** The Wechsler Intelligence Scale  
6 (WIS) was developed for the assessment of the intellectual performance of adults. The  
7 WISC was developed as a version for children, which was followed by the revised  
8 version, WISC-R. The WISC III is the third version of the scale for children and is used  
9 to assess intellectual capacity using 13 subtests, 12 from earlier versions and one  
10 additional subtest. The subtests are organized into two groups (verbal and perceptive-  
11 motor or execution) and are administered in alternating order. The verbal subtests are  
12 Information, Similarities, Arithmetic, Vocabulary, Comprehension and Digits. The  
13 execution group is composed of Matrix Reasoning, Coding, Figure Weights, Block  
14 Design, Picture Concepts, Symbol Search and Mazes. Many studies have been  
15 conducted and, although improvements have been made with the addition of new  
16 items, the fundamental characteristics of the WISC and WISC-R remained the same in  
17 WISC III.<sup>[57]</sup>  
18  
19  
20  
21  
22  
23  
24  
25  
26  
27  
28  
29  
30  
31  
32  
33  
34  
35  
36  
37  
38  
39  
40  
41  
42  
43  
44  
45  
46  
47  
48  
49  
50  
51  
52  
53  
54  
55  
56  
57  
58  
59  
60

## 4. Procedures

### 4.1 Intervention protocol

The therapeutic intervention will consist of a combination of tDCS and VR during reaching movements. The protocol will follow safety procedures described in the literature for the use of tDCS on the pediatric population.<sup>[29,58,59]</sup> Three 20-minute sessions of combined therapy (tDCS concomitantly to upper limb motor training) will be held for a total of ten sessions.<sup>[29,30,39,40]</sup>

### 4.2 Transcranial direct current stimulation

Stimulation will be administered using a tDCS device (*DC-Stimulator NeuroCo nn*, Germany), with three sponge (non-metallic) surface electrodes measuring 25 cm<sup>2</sup> (5 x 5 cm) soaked in saline solution.<sup>[60]</sup> The children will be randomly allocated to two types of treatment: 1) active anodal stimulation over the primary cortex bilaterally; and 2) sham transcranial stimulation. The two anodal electrodes will be positioned over C3 and C4 of the 10-20 international electroencephalogram system<sup>□</sup> and the cathode will be positioned over the right deltoid muscle. This montage will enable the child to receive multiple-monopolar anodal tDCS over the primary motor cortex, specifically the area that manages upper limb motor control, while minimizing the effect of cathodal stimulation in the brain.<sup>[61-63]</sup> A current of 1 mA (current density: 0.029 mA/cm<sup>2</sup>) will be administered over the primary motor cortex for 20 minutes during upper limb training.<sup>[29,30,39,40]</sup> The stimulator has a button that allows the operator to control the intensity of the current. At the beginning of the session, stimulation will be increased gradually until reaching 1 mA and gradually diminished during the final ten seconds of the session. Sham stimulation will consist of the same electrode montage and the stimulator will be switched on for 30 seconds, giving the child the initial sensation of stimulation, but no current will be administered during the remainder of the session. This is considered a valid control procedure in studies involving tDCS.

1  
2  
3  
4  
5  
6  
7  
8  
9  
10  
11  
12  
13  
14  
15  
16  
17  
18  
19  
20  
21  
22  
23  
24  
25  
26  
27  
28  
29  
30  
31  
32  
33  
34  
35  
36  
37  
38  
39  
40  
41  
42  
43  
44  
45  
46  
47  
48  
49  
50  
51  
52  
53  
54  
55  
56  
57  
58  
59  
60

**Adverse effects:** Potential adverse effects of tDCS will be evaluated at the end of each session using a questionnaire administered to the child. The questionnaire will address the perception of symptoms having occurred during the session, such as tingling, a burning sensation, headache, pain at the electrode sites, sleepiness, and altered mood. The children will be instructed to answer using a three-point scale. The caregivers and children will also be asked open-ended questions at the beginning of each session regarding the occurrence of headache, scalp pain, burning sensations, redness of the skin, sleepiness, difficulty concentrating, and mood swings during periods between sessions.

### 4.3 Virtual reality training protocol

Training sessions will be held three times per week on non-consecutive days. Each session will last 20 minutes and will involve the use of the XBOX 360™ with the Kinect™ motion detector.<sup>[64]</sup> The game entitled “Bursting Bubbles” of the Adventure set of games was chosen based on the potential to stimulate cognitive skills and enhance execution time, motor coordination, attention, concentration, reasoning, memory, persistence, and precise movement. The activity will be held in a specific room of the Integrated Human Movement Analysis Laboratory measuring 2.5 x 4.0 m, with a projection screen (200 x 150 cm) attached to the wall and stereo speakers to provide adequate visual and auditory stimuli. Initially, the child will be instructed to remain standing at a distance of two to three meters in front of the motion detector to capture the movements better as well as for the estimation of height and calculation of the body mass index. Two mobility training sessions with the use of the XBOX 360 exercises will be performed prior to the onset of the intervention protocol. Records will be made of the number of sessions attended and duration of each session.<sup>[64-66]</sup>

## 5. Analysis of results

The Shapiro-Wilk test will be used to determine whether the data adhere to the Gaussian curve. Parametric variables will be expressed as mean and standard deviation. Nonparametric variables will be expressed as median and interquartile range. Effect sizes will be calculated from the differences in means between the pre-intervention and post-intervention evaluations. The effect size values will be expressed with respective 95% confidence intervals. Either two-way ANOVA (parametric variables) or the Kruskal-Wallis test (non-parametric variables) will be used for the analysis of the effects of the upper limb motor training activity with active and sham tDCS. Logistic regression models will be created to determine factors predictive of the response to the intervention. For such, movement velocity and total duration of movement will be considered. The response capacity will be defined as a clinically significant increase in performance in comparison to baseline. The independent variables will be age (years), sex (male/female), activity of elbow flexors and extensors, cerebral activity (C3 and C4) and functional independence (aspects of self-care). Univariate regressions will be performed for each variable. Based on the initial analyses, the predictors associated with the outcome with a p-value  $\leq 0.05$  will be incorporated into the multivariate model. Moreover, Pearson's correlation coefficients will be calculated to determine correlations among the variables analyzed. A p-value  $< 0.05$  will be considered indicative of statistical significance. The data will be organized and tabulated with the aid of the Statistical Package for the Social Sciences (SPSS v.19.0).

## 6. Discussion

Upper limb motor control enables individuals to perform functional activities. VR will be used as a therapeutic tool to enhance motor control.<sup>[29-30]</sup> Moreover, a noninvasive brain stimulation method (tDCS) will be employed to facilitate motor cortical excitability in the areas subjacent to stimulation to enhance the effects of motor control and learning.<sup>[67]</sup> Lazzari et al. (2016) demonstrated the efficacy of the combination of tDCS and VR in potentiating motor effects on balance and functional mobility in children with cerebral palsy.<sup>[30]</sup>

This document offers a detailed description of a randomized, controlled, double-blind, clinical trial designed to determine the effectiveness of VR training combined with tDCS on upper limb movements in individuals with DS

## 7. Ethical aspects and divulgation

The present study is in compliance with the guidelines regulating studies involving human subjects established by the Brazilian National Board of Health in October 1996 and updated in Resolution 466 in 2012. The study will be developed at the Integrated Human Movement Analysis Laboratory of University *Nove de Julho* (Sao Paulo, Brazil) and has received approval from the Human Research Ethics Committee of the university under process number 1.517.470 (APPENDIX 1). The protocol has been registered with Clinical Trials. All legal guardians will receive clarifications regarding the procedures and will be aware that participation is voluntary, free of cost and experimental. Those who agree to their child's participation will sign a statement of informed consent (APPENDIX 2). The guardians will be assured of access to all information and will be informed of the possibility of dropping out of the study or withdrawing consent at any time with no negative consequences. The anonymity of the children and the confidentiality of their information will be ensured, following the ethical principles of privacy. The findings will be published and will contribute evidence regarding the use of transcranial direct current stimulation combined with upper limb motor training in this population.



## 8. Conflict of Interest Statement

The authors have no financial or competing interests

## 9. Acknowledgments

The authors gratefully acknowledge financial support from the Brazilian fostering agencies Foundation for Research Support (FAPESP - 2016 / 11156-0), Coordination for the Improvement of Higher Education Personnel (CAPES), and the National Council for Scientific and Technological Development (CNPq).

## 10. Funding

The authors gratefully acknowledge financial support from the Brazilian fostering agencies Foundation for Research Support (FAPESP - 2016 / 11156-0).

## 11. Abbreviations

DS: Down Syndrome; tDCS: Transcranial direct-current stimulation; EMG: Electromyography; PEDI: Pediatric Evaluation of Disability Inventory; WISC III: Wechsler Intelligence Scale for Children; VR: Virtual Reality

## 12. List of Figures

**Figure 1:** Flowchart of study based on CONSORT statement

**Figure 2:** Placement of markers for three-dimensional analysis using *SMARTup: The experimental setup*

**Figure 3:** Phases of reaching cycle

**Figure 4:** Phase relationships. (A) synchronized signals – differences in phases between both signals are stable (constant); (B) non-synchronized signals – differences in phases are variable

**Figure 5:** Positioning of EEG electrodes based on 10-20 standard

## REFERENCES

1. Moreira LMA, El-Hani CN, Gusmão FAF. **A syndrome de down e sua patogênese: considerações sobre o determinismo genético.** Rev Bras Psiquiatr. 2000; 22(2): 96-9.
2. Lewada AF, Matsonff A, Revenis M, Futtermam C, Nino G, Greenberg J, et al. **Preoperative evaluation and comprehensive risk assessment for children with Down syndrome. Pediatric Anesthesia.** 2016; 26: 356–362.
3. Moreira LMA, Gusmão FAF. **Aspectos genéticos e sociais da sexualidade em pessoas com síndrome de Down.** Rev Bras Psiquiatria. 2002; 24(2): 94-9.
4. Silva MFMC, Kleinahas ACS. **Cognitive processes and brain plasticity in Down Syndrome.** Revis. Bras. Edc. Esp. 2006; 12: 123-138.
5. Luria, AR, Tskvetkova, LS. **The proگرامing of constructive activety in local brain injuries.** Neuropsychological .1964; 95-107
6. Flórez BJ, Troncoso VM. **Síndrome de Down y educación.** 3. reimp. Barcelona: Masson – Salvat Medicina y Santander, 1997.
7. Santos APM, Weiss LI, Almeida GMF. **Assessment and intervention in the motor development of a child with Down syndrome.** Rev Bras Ed Esp Marília. 2010; 16: 19-30
8. Pandilla, M.M. **Pyramidal cell abnormalities in the motor cortex of a child with Down's Syndrome: a golgi study.** Journal of Comparative Neurology. 197;667;63-81.
9. Seaman, J.; Depauw, K.P. **The new adapted physical education.** California, Mayfield, 1982.
10. Block, M.E. **Motor development in children with Down Syndrome: a review of the literature.** Adapted Physical Activity Quaterly. 1991. 8, 79-209.
11. Bomono LMM, Rosseti CB. **Aspects in perceptual-motor development and sensory-motor intelligence in Down syndrome.** Rev bras crescimento desenvolv hum. 2010; 3: 723-734.
12. Connolly, K.J. **Skill development: Problems and Plans.** In: CONNOLLY, K.J. (ed.) **Mechanisms of motor skill development.** London, Academic Press, 1970
13. Gimenez, R; Stefanoni, F.F & Farias, P.B. **Relação entre a capacidade de sincronização temporal e as habilidades motoras rebater e receber em indivíduos portadores da síndrome de Down.** Revista Brasileira de Ciência e Movimento.
14. Schwartzman, J.S. **Síndrome de Down.** São Paulo, Editora Mackenzie, 1999.

15. Marconi NF, Almeida GL **Principles for learning horizontal-planar arm movements with reversal**. Journal electromyographic and Kinesiology. 2008. 18;771-779
16. Marconi NF, Almeida GL, Gottlieb GL. **Electromyographic and kinetic strategies to control movements**. Brazilian journal of physical therapy. 2006 10;1-8.
17. Latash ML, Corcos DM. **Kinematic and electromyographic characteristics of single-joint movements of individuals with Down syndrome**. Am J Ment Retard. 1991; 96: 189-201.
18. Almeida GL, Corcos DM, Latash ML. **Practice and transfer effects during fast single-joint elbow movements in individuals with Down syndrome**. Phys Ther. 1994; 74: 1000-1016.
19. Almeida GL, Hasan Z, Corcos DM. **Horizontal-plane arm movements with direction reversals performed by normal individuals and individuals with Down syndrome**. J Neurophysiol. 2000; 84: 1949-1960.
20. Aruin AS, Almeida GL, Latash ML. **Organization of a simple two-joint synergy in individuals with Down syndrome**. Am J Ment Retard. 1996; 101: 256-268.
21. Aruin, AS, Almeida GL. **A co-activation strategy in anticipatory postural adjustments in persons with Down syndrome**. Motor Control 1997; 01: 178-191.
22. Latash ML, Anson JG. **What are “normal movements” in atypical populations**. Behav Brain Sci. 1996; 19: 55-68.
23. Marconi NF. **Controle motor de movimentos de reversão em indivíduos neurologicamente normais e portadores da síndrome de Down: O efeito do feedback intrínseco [dissertação]**. Campinas (SP): Universidade Estadual de Campinas; 2000.
24. Ferreira SMS. **Modulação da Latência da Musculatura Antagonista em Indivíduos "neurologicamente normais" e portadores da Síndrome de Down [dissertação]**. Rio Claro (SP): Universidade Estadual Paulista; 2000.
25. Lorenzo SM, Braccialli LMP, Araújo RCT. **Realidade virtual como intervenção na Síndrome de down: uma perspectiva de ação na interface educação e saúde**. Rev Bras Educ Espc. 2015; 21: 392-396.
26. Wang YP, Chiang CS, Su CY, Wang CC. **Effectiveness of virtual reality using Wii gaming technology in children with Down syndrome**. Res Dev Disabil. 2011; 32: 312–321.
27. Lin HC, WangYP. **Strength and agility training in adolescents with Down syndrome: A randomized controlled trial**. Res Dev Disabil. 2012; 33: 2236–2244.
28. Mello BCC, Ramalho TF. **Use of virtual reality in the physical therapeutic treatment of individuals with Down syndrome**. Rev Neurocienc. 2015; 23: 143-149.

- 1  
2  
3  
4 29. Moura RFC, Santos C, Grecco LCA, Albertini G, Cimolin V, Galli M, Oliveira C  
5 **Effects of a single session of transcranial direct current stimulation on upper limb**  
6 **movements in children with cerebral palsy: A randomized, sham controlled study.**  
7 *Developmental Neurorehabilitation.* 2017. 19:18.  
8  
9  
10 30. Lazzari RD, Politti F, Belina ST, Grecco LAC, Santos CA, Dumont AJL et al.  
11 **Effect of Transcranial Direct Current Stimulation Combined With Virtual Reality**  
12 **Training on Balance in Children With Cerebral Palsy: A Randomized, Controlled,**  
13 **Double-Blind, Clinical Trial.** *Journal of Motor Behavior.* 2016. 1940-1027.  
14  
15  
16 31. Stagg CJ, Bachtiar V, O'Shea J, Allman C, Bosnell RA, Kischka U, Matthews PM,  
17 Johansen-Berg H. **Cortical activation changes underlying stimulation induced**  
18 **behavioral gains in chronic stroke.** *Brain.* 2012; 135:276-84.  
19  
20 32. Miranda PC, Lomarev M, Hallett M. **Modeling the current distribution during**  
21 **transcranial direct current stimulation.** *Clin Neurophysiol.* 2006; 117(7):1623-9.  
22  
23 33. Wagner T, Fregni F, Fecteau S, Grodzinsky A, Zahn M, Pascual-Leone A.  
24 **Transcranial direct current stimulation: A computer-based human model study.**  
25 *Neuroimage* 2007; 35:1113-24.  
26  
27 34. Liebetanz D, Nitsche MA, Teragau F, Paulus W. **Pharmacological approach to**  
28 **the mechanisms of transcranial DC- stimulation- induced after-effects of humam**  
29 **motor cortex excitability.** *Brain* 2002; 125: 2238-47.  
30  
31 35. Kuo MF, Unger M, Liebetanz D, Lang N, Tergau F, Paulus W, Nittshe MA.  
32 **Limited impact of homeostatic plasticity on motor learning in humans.**  
33 *Neuropsychologia.* 2008; 46: 2122-8.  
34  
35 36. Monte-SilvaK, Kuo M-F, Thirugnanasambandam N, Liebetanz D, Paulus W, Nitsche  
36 MA. **Dose- dependente inverted U-shaped effect of dopamine (D2-like) receptor**  
37 **activation on focal and nonfocal plasticity in humans.** *The Journal of Neuroscience.*  
38 2009; 29 (19):6124-31.  
39  
40 37. Nitsche MA, Liebetanz D, Schlitterlau a, Henschke U, Friche K, Frommann K, et al.  
41 **GABAergic modulation of DC stimulation-induced motor cortex excitability shifts in**  
42 **humans.** *Eur J Neurosc.* 2004;19(10): 2720-6.  
43  
44 38. Dumont AJL, Araujo M, Lazzari RD, Santos CA, Carvalho DB, Moura RCF.  
45 **Effects of a single session of transcranial direct current stimulation on static balance**  
46 **in a patient with hemiparesis: a case study.** *J. Phys. Ther. Sci.* 2015. 27: 955–958.  
47  
48 39. Duarte NDA, Grecco LAC, Galli M, Fregni F, Oliveira C. **Effect of Transcranial**  
49 **Direct-Current Stimulation Combined with Treadmill Training on Balance and**  
50 **Functional Performance in Children with Cerebral Palsy: A Double-Blind**  
51 **Randomized Controlled Trial.** *PLOS ONE.* 2014. 9;8  
52  
53  
54  
55  
56  
57  
58  
59  
60

- 1  
2  
3  
4  
5  
6  
7  
8  
9  
10  
11  
12  
13  
14  
15  
16  
17  
18  
19  
20  
21  
22  
23  
24  
25  
26  
27  
28  
29  
30  
31  
32  
33  
34  
35  
36  
37  
38  
39  
40  
41  
42  
43  
44  
45  
46  
47  
48  
49  
50  
51  
52  
53  
54  
55  
56  
57  
58  
59  
60
40. Grecco LAC, Duarte NDA, Zanon N, Galli M, Fregni F, Oliveira C. **Effect of a single session of transcranial direct-current stimulation on balance and spatiotemporal gait variables in children with cerebral palsy: A randomized sham-controlled study.** *Braz J Phys Ther.* 2014; 18: 419-427.
41. Mendonça ME, Fregni F. **Neuromodulação com estimulação cerebral não invasiva: aplicação no acidente vascular encefálico, doença de Parkinson e dor crônica.** In.: ASSIS, R.D. *Condutas práticas em fisioterapia neurológica.* Manole. São Paulo, p. 307-39, 2012.
42. Fregni F, Gimenes R, Valle AC, Ferreira MJ, Rocha RR, Natalle L, Bravo R, Rigonatti SP, Freedman S, Nitsche M, Pascual-Leone A, Boggio PS. **A randomized, sham-controlled, proof of principle study of transcranial direct current stimulation for the treatment of pain in fibromyalgia.** *Arthritis and Rheumatism,* 2006; 54:3988-98.
43. Fregni F, Bossio PS, Brunoni AR. **Neuromodulação terapêutica: Princípios e avanços da estimulação cerebral não invasiva em neurologia, reabilitação, psiquiatria e neuropsicologia.** Sarvier. São Paulo, 2012.
44. Fritsch B, Reis J, Martinowich K, Schambra HM, Ji Y, Cohen LG, et al. **Direct current stimulation promotes BDNF-dependent synaptic plasticity: potential implications for motor learning.** *Neuron.* 2010;66(2): 198-204.
45. Reis J, Robertson EM, Krakauer JW, Rothwell J, Marshall L, Gerloff C, et al. **Consensus: Can transcranial direct current stimulation and transcranial magnetic stimulation enhance motor learning and memory formation.** *Brain stimulation.* 2008;1(4): 363-9.
46. Antal A, Lang N, Boros K, Nitsche M, Siebner HR, Paulus W. **Homeostatic metaplasticity of the motor cortex is altered during headache-free intervals in migraine with aura.** *Cerebral cortex.* 2008;18(11):2701-5.
47. Cimolin V, Beretta E, Piccinini L, Turconi AC, Galli M, Strazzer S. **Constraint-induced movement therapy for children with hemiplegia after traumatic brain injury: a quantitative study.** *J Head Trauma Rehabil.* 2012; 27(3): 177-87.
48. Menegoni F, Milano E, Trotti C, Galli M, Bigoni M, Baudo S, Mauro A. **Quantitative evaluation of functional limitation of upper limb movements in subjects affected by ataxia.** *Eur J Neurol.* 2009; 16(2): 232-9.
49. Petuskey K, Bagley A, Abdala E, James MA, Rab G. **Upper extremity kinematics during functional activities: three-dimensional studies in a normal pediatric population.** *Gait Posture.* 2007; 25(4): 573-9.

- 1  
2  
3  
4  
5  
6  
7  
8  
9  
10  
11  
12  
13  
14  
15  
16  
17  
18  
19  
20  
21  
22  
23  
24  
25  
26  
27  
28  
29  
30  
31  
32  
33  
34  
35  
36  
37  
38  
39  
40  
41  
42  
43  
44  
45  
46  
47  
48  
49  
50  
51  
52  
53  
54  
55  
56  
57  
58  
59  
60
50. Hermes JH, Freriks B, Merletti R, Stegeman D, Blok J, Rau G, Disselhorst-Klug C, Hagg G: **SENIAM 8: Surface Electromyography for the Non-Invasive Assessment of Muscles**. Roessingh Research and Development 1999.
51. Rab G, Petuskey K, Bagley A. **A method for determination of upper extremity kinematics**. *Gait Posture*. 2002; 15(2): 113-9.
52. Jasper HH. **The ten-twenty electrode system of the International Federation electroencephalografia**. *Clin Neurophysiol*. 1958; 10: 371-375.
53. Homan RW, Herman J, Purdy P. **Cerebral location of international 10-20 system electrode placement**. *Electroencephalogr Clin Neurophysiol*. 1987; 66(4): 376-82.
54. FELL, J.; AXMACHER, N. **The role of phase synchronization in memory processes**. *Nature Reviews Neuroscience*, v. 12, n. 2, p. 105–118, fev. 2011
55. Haley S, Coster W, Ludlow L. **Inventário de avaliação pediátrica de disfunção: versão brasileira. Tradução e adaptação cultural**: Mancini M C. Belo Horizonte: Laboratórios de Atividade e Desenvolvimento Infantil, Departamento de Terapia Ocupacional, Universidade Federal de Minas Gerais. 2000.
56. Feldman AB, Haley SM, Corvell J. **Concurrent and construct validity of the Pediatric Evaluation of Disability Inventory**. *Phys. Ther.* 1990; 70(10): 602-10.
57. Cruz MBZ, WISC III: **Escala de Inteligência Wechsler para crianças: Manual**. *Periodicos eletrônicos em psicologia*. 2005; 4: 309.
58. Grecco LA, de Almeida Carvalho Duarte N, Mendonça ME, Cimolin V, Galli M, Fregni F, Santos Oliveira C. **Transcranial direct current stimulation during treadmill training in children with cerebral palsy: a randomized controlled double-blind clinical trial**. *Research in Developmental Disabilities* 2014;3 (11):2840–2848.
59. Gillick T, Feyma T, Menk J, Usset M, Vaith A, Wood J, Worthing R et al., **Safety and feasibility of transcranial direct current stimulation in pediatric hemiparesis: randomized controlled preliminary study**. *Physical Therapy* 2015;95(3):337–349.
60. Grecco et al. **Cerebellar transcranial direct current stimulation in children with ataxic cerebral palsy: a sham-controlled, crossover, pilot study**. *Developmental Neurorehabilitation* 2016;22:1–7
61. Naseri P, Nitsche MA e Ekhtiar H. **A framework for categorizing electrode montages in transcranial direct current stimulation**. *Front Hum Neurosci*. 2015, 6;9:54.
62. Boggio P. S., Ferruci R., Mameli F., Martins D., Martins O., Vergari M., et al. . (2012). **Prolonged visual memory enhancement after direct current stimulation in Alzheimer's disease**. *Brain Stimul*. 5, 223–230. 10.1016/j.brs.2011.06.006 [PubMed] [Cross Ref]

- 1  
2  
3  
4 63. Lapenta O. M., Fregni F., Oberman L. M., Boggio P. S. (2012). **Bilateral temporal**  
5 **cortex transcranial direct current stimulation worsens male performance in a**  
6 **multisensory integration task.** *Neurosci. Lett.* 527, 105–109.  
7 10.1016/j.neulet.2012.08.076 [PubMed] [Cross Ref]  
8  
9  
10 64. Chamovitz YS e Weiss PL **Virtual reality as a leisure activity for young adults**  
11 **with physical and intellectual disabilities** *Science Direct.* 2008;29:273- 287  
12  
13 65. Wuang PY, Chiang SC, Su YC et al., **Effectiveness of virtual reality using Wii**  
14 **gaming technology in children with Down syndrome** *Science Direct.* 2011; 32: 312-321  
15  
16 66. Lin HC e Wuang PY **Strength and agility training in adolescents with Down**  
17 **syndrome: A randomized controlled trial.** *Science Direct* 2012;33:2236-2244.  
18  
19 67. Minhas P, Bikson M, Woods AJ, Rosen AR, Kessler SK. **Transcranial direct**  
20 **current stimulation in pediatric brain: a computational modeling study.** *Conf Proc*  
21 *IEEE Eng Med Biol Soc.* 2012;2012:859–62  
22  
23  
24  
25  
26  
27  
28  
29  
30  
31  
32  
33  
34  
35  
36  
37  
38  
39  
40  
41  
42  
43  
44  
45  
46  
47  
48  
49  
50  
51  
52  
53  
54  
55  
56  
57  
58  
59  
60

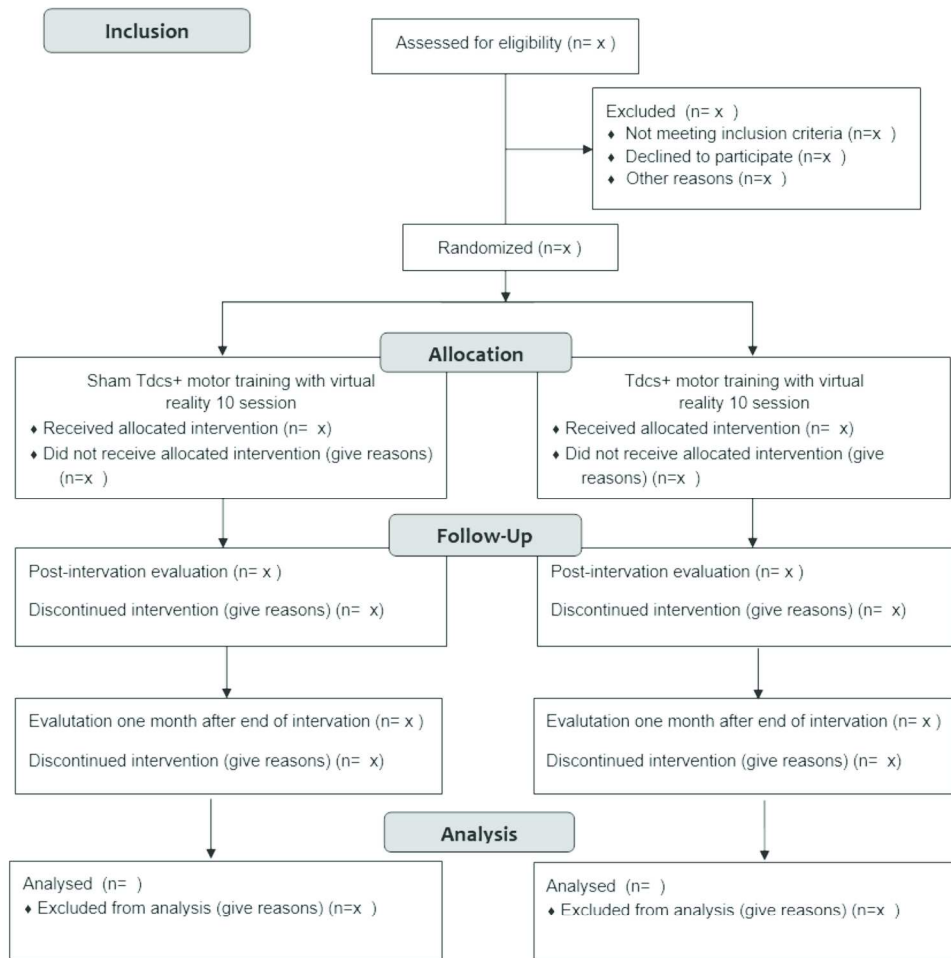

Figure 1: Flowchart of study following CONSORT statement

205x213mm (300 x 300 DPI)

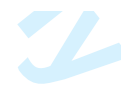



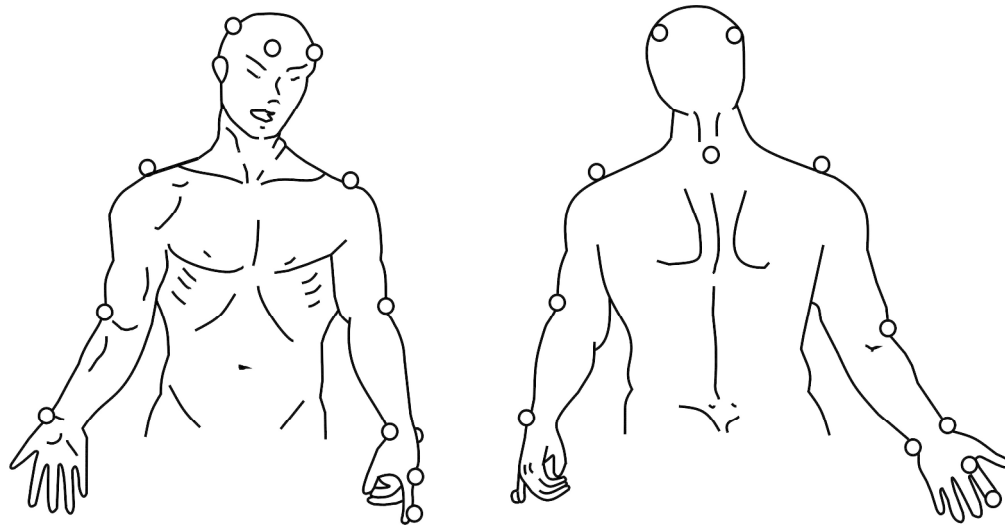

Figure 2: Placement of markers for three-dimensional analysis using SMARTup: The experimental setup

287x149mm (300 x 300 DPI)

review only

1  
2  
3  
4  
5  
6  
7  
8  
9  
10  
11  
12  
13  
14  
15  
16  
17  
18  
19  
20  
21  
22  
23  
24  
25  
26  
27  
28  
29  
30  
31  
32  
33  
34  
35  
36  
37  
38  
39  
40  
41  
42  
43  
44  
45  
46  
47  
48  
49  
50  
51  
52  
53  
54  
55  
56  
57  
58  
59  
60

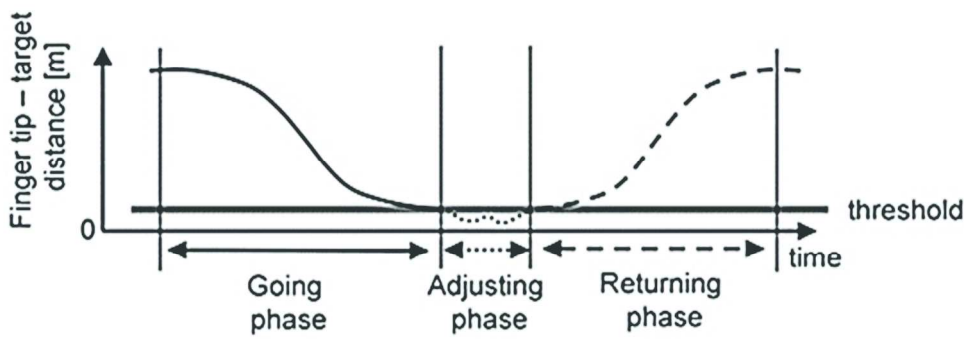

Figure 3: Phases of reaching cycle  
294x137mm (300 x 300 DPI)

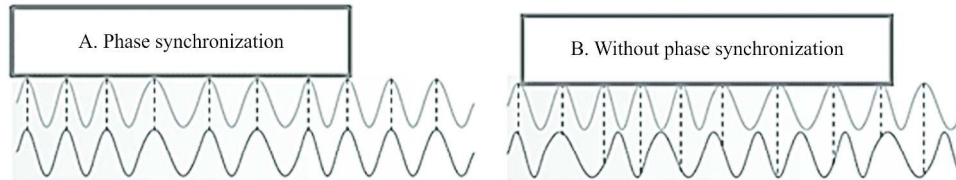

Figure 4 – Phase relationships. (A) synchronized signals – differences in phases between both signals are stable (constant); (B) non-synchronized signals – differences in phases are variable

280x95mm (300 x 300 DPI)

Peer review only

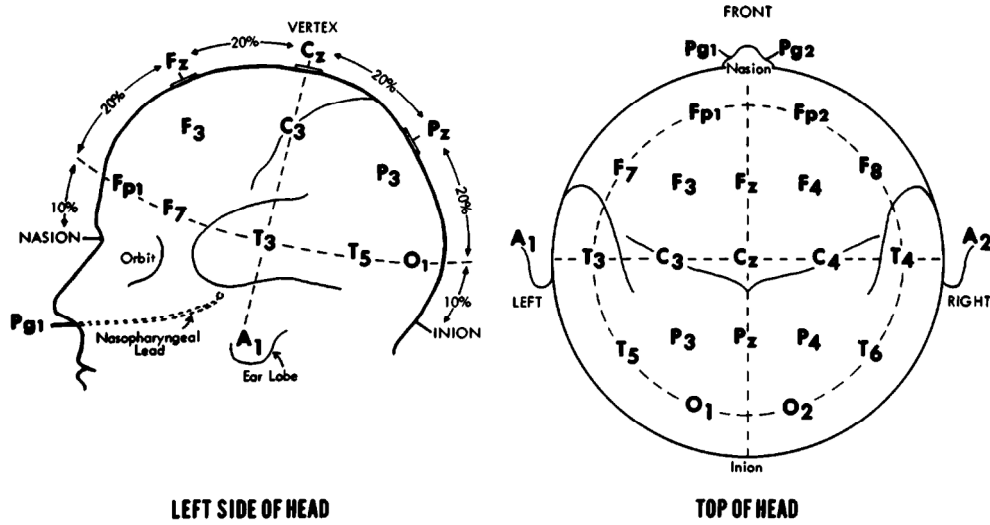

Figure 5 – Positioning of EEG electrodes following 10-20 standard

355x188mm (300 x 300 DPI)

review only

**APPENDIX 1**

## Termo de Consentimento para Participação em Pesquisa Clínica

Nome do Voluntário: \_\_\_\_\_

Endereço: \_\_\_\_\_

Telefone para contato: \_\_\_\_\_ Cidade: \_\_\_\_\_ CEP: \_\_\_\_\_

E mail: \_\_\_\_\_

1. As informações contidas neste prontuário foram fornecidas pela aluna Jamile Benite Palma Lopes (Mestranda da Universidade Nove de Julho), Prof<sup>a</sup>. Claudia Santos Oliveira, objetivando firmar acordo escrito mediante o qual, o voluntário da pesquisa autoriza sua participação com pleno conhecimento da natureza dos procedimentos e riscos a que se submeterá, com a capacidade de livre arbítrio e sem qualquer coação.

2. Título do Trabalho Experimental: Realidade virtual e estimulação transcraniana por corrente contínua anódica para melhora da função motora de membros superiores em crianças com síndrome de down: ensaio clínico controlado aleatorizado e duplo cego.

3. Objetivo: Examinar os efeitos da estimulação por corrente sobre o controle motor, atividade dos músculos, atividade do cérebro e independência funcional de crianças com Síndrome de Down.

4. Justificativa: acredita-se que ao aplicar a estimulação por corrente, especificamente, durante o treino motor com uso de um vídeo game, será possível, otimizar a atividade do cérebro e a melhora motora.

5. Procedimentos da Fase Experimental: Será selecionadas crianças diagnosticadas com Síndrome de Down, com capacidade de entendimento e colaboração para realização dos procedimentos envolvidos no estudo, crianças com idade entre seis e 12 anos, crianças com queixas de comprometimento Na coordenação motora dos braços. O processo de avaliação (antes, após e um mês após o treino, será realizado em três dias não consecutivos, mas na mesma semana, com período máximo de uma hora e 30 minutos por dia. A avaliação será constituída dos seguintes itens: (1) Analise de movimento dos braços durante uma tarefa: avaliado pela cinemática, eletromiografia e eletroencefalograma, a criança realizara uma tarefa com os braços e ao mesmo tempo será avaliada pelos aparelhos, sendo acompanhada pelo fisioterapeuta responsável e pelos assistentes (2) PEDI o PEDI é um questionário aplicado no formato de entrevista estruturada com um dos cuidadores da criança, que possa informar sobre seu desempenho em atividades e tarefas típicas da rotina diária. O teste é composto de três partes: a primeira avalia habilidades de repertório de crianças agrupadas segundo as seguintes guidelines.xhtml

1  
2  
3 funcionais: autocuidado (73 itens), mobilidade (59 itens) e função social (65 itens). Cada  
4 item dessa parte é pontuado com escore 0 (zero) se a criança não é capaz de desempenhar  
5 a atividade, ou 1 (um), se a atividade fizer parte de seu repertório de habilidades. O Grupo  
6  
7  
8  
9  
10  
11  
12  
13  
14  
15  
16  
17  
18  
19  
20

21 **6. Desconforto ou Risco Esperado:** Embora os procedimentos adotados no estudo  
22 sejam não-invasivos os voluntários serão submetidos a risco como por exemplo, quedas,  
23 fadiga muscular, câimbras durante o treino motor de realidade virtual. Para que estes  
24 riscos sejam minimizados ao máximo serão adotadas as seguintes medidas protetoras: A  
25  
26  
27  
28  
29  
30  
31  
32  
33  
34  
35

36 **7. Informações:** o voluntário tem garantia que receberá respostas a qualquer  
37 pergunta ou esclarecimento de qualquer dúvida quanto aos procedimentos, riscos  
38 benefícios e outros assuntos relacionados com pesquisa. Também os pesquisadores  
39  
40  
41  
42  
43  
44  
45

46 **8. Retirada do Consentimento:** o voluntário tem a liberdade de retirar seu  
47 consentimento a qualquer momento e deixar de participar do estudo, sem que isto lhe  
48  
49  
50

51 **9. Aspecto Legal:** Elaborados de acordo com as diretrizes e normas  
52 regulamentadas de pesquisa envolvendo seres humanos atendendo à Resolução nº. 466/12  
53  
54  
55  
56

57 **10. Garantia de Sigilo:** Os pesquisadores asseguram a privacidade dos voluntários  
58 quanto aos dados confidenciais envolvidos na pesquisa.  
59

60 **11. Formas de ressarcimento das despesas decorrentes da participação na pesquisa:** Se necessário, será dado aos pesquisados auxílio transporte de ida e volta ao local da pesquisa. Não será dada ao pesquisado qualquer tipo de remuneração e auxílio de custo pela participação na pesquisa. Pelo curto tempo das avaliações e intervenções não haverá fornecimento de alimentação ao pesquisado.

1  
2  
3  
4  
5  
6  
7  
8  
9  
10  
11  
12  
13  
14  
15  
16  
17  
18  
19  
20  
21  
22  
23  
24  
25  
26  
27  
28  
29  
30  
31  
32  
33  
34  
35  
36  
37  
38  
39  
40  
41  
42  
43  
44  
45  
46  
47  
48  
49  
50  
51  
52  
53  
54  
55  
56  
57  
58  
59  
60

12. Local da Pesquisa: A pesquisa será desenvolvida no Laboratório Integrado de Análise do Movimento Humano - LIAMH e Núcleo de Apoio a Pesquisa na Análise do Movimento - NAPAM, Universidade Nove de Julho UNINOVE, localizada na rua Vergueiro, no 235/249, 2º subsolo, Vergueiro, São Paulo - SP.

13. Comitê de Ética em Pesquisa (CEP) é um colegiado interdisciplinar e independente, que deve existir nas instituições que realizam pesquisas envolvendo seres humanos no Brasil, criado para defender os interesses dos participantes de pesquisas em sua integridade e dignidade e para contribuir no desenvolvimento das pesquisas dentro dos padrões éticos (Normas e Diretrizes Regulamentadoras da Pesquisa envolvendo Seres Humanos – Res. CNS nº 466/12). O Comitê de Ética é responsável pela avaliação e acompanhamento dos protocolos de pesquisa no que corresponde aos aspectos éticos.

**Endereço do Comitê de Ética da Uninove: Rua. Vergueiro nº 235/249 – 3º subsolo - Liberdade – São Paulo – SP CEP. 01504-001 Fone: 3385-9197 . comitedeetica@uninove.br**

14. Nome Completo e telefones dos pesquisadores para contato: Orientadora: Claudia Santos Oliveira (11 3665 9344) e aluno de pós graduação: Jamile Benite Palma Lopes (11) 975123549.

15. Eventuais intercorrências que vierem a surgir no decorrer da pesquisa poderão ser discutidas pelos meios próprios.

16. Consentimento Pós-Informação:

Eu, \_\_\_\_\_, após leitura e compreensão deste termo de informação e consentimento, entendo que minha participação é voluntária, e que posso sair a qualquer momento do estudo, sem prejuízo algum. Confirmando que recebi cópia deste termo de consentimento, e autorizo a execução do trabalho de pesquisa e a divulgação dos dados obtidos neste estudo no meio científico.

\* Não assine este termo se ainda tiver alguma dúvida a respeito. São Paulo, de de 2016.

Nome (por extenso) do pesquisado:

Assinatura do pesquisado:

Nome (por extenso) do pesquisado:

Assinatura do pesquisado:

1  
2  
3  
4  
5  
6  
7  
8  
9  
10  
11  
12  
13  
14  
15  
16  
17  
18  
19  
20  
21  
22  
23  
24  
25  
26  
27  
28  
29  
30  
31  
32  
33  
34  
35  
36  
37  
38  
39  
40  
41  
42  
43  
44  
45  
46  
47  
48  
49  
50  
51  
52  
53  
54  
55  
56  
57  
58  
59  
60

For peer review only



## APPENDIX 2

## Approval of the Ethics Committee

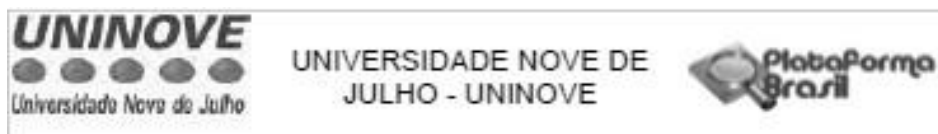

## PARECER CONSUBSTANCIADO DO CEP

## DADOS DO PROJETO DE PESQUISA

**Título da Pesquisa:** REALIDADE VIRTUAL E ESTIMULAÇÃO TRANSCRANIANA POR CORRENTE CONTÍNUA PARA MELHORA DA FUNÇÃO MOTORA DE MEMBROS SUPERIORES EM CRIANÇAS COM SÍNDROME DE DOWN: ENSAIO CLÍNICO CONTROLADO ALEATORIZADO E DUPLO CEGO

**Pesquisador:** Jamile Benite Palma Lopes

**Área Temática:**

**Versão:** 1

**CAAE:** 55196516.0.0000.5511

**Instituição Proponente:** ASSOCIAÇÃO EDUCACIONAL NOVE DE JULHO

**Patrocinador Principal:** Financiamento Próprio

## DADOS DO PARECER

**Número do Parecer:** 1.517.470

**Apresentação do Projeto:**

O projeto chama a atenção para as dificuldades motoras apresentadas por crianças com síndrome de down, e sugere uma intervenção que possibilite uma melhora no controle motor dessa população.

**Objetivo da Pesquisa:**

Verificar os efeitos da estimulação transcraniana por corrente contínua (tDCS) associado a um treino neuromotor em membro superior com realidade virtual sobre a atividade cerebral e controle motor em crianças com Síndrome de Down (SD).

 **Avaliação dos Riscos e Benefícios:**

Embora os procedimentos adotados no estudo sejam não-invasivos os voluntários serão submetidos a risco como por exemplo, quedas, fadiga muscular, câimbras durante o treino motor de realidade virtual. Para que estes riscos sejam minimizados ao máximo serão adotadas as seguintes medidas protetoras: A estimulação transcraniana será realizada por uma fisioterapeuta com experiência na técnica. No treino de realidade virtual serão realizados por uma fisioterapeuta com experiência em treino motor que será acompanhada por ao menos um voluntário ambos

Endereço: VERGUEIRO nº 235/249  
Bairro: LIBERDADE CEP: 01.504-001  
UF: SP Município: SAO PAULO  
Telefone: (11)3385-0197 E-mail: comitedetica@uninove.br

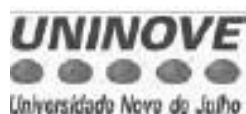

UNIVERSIDADE NOVE DE  
JULHO - UNINOVE

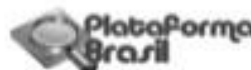

Continuação do Parecer: 1.517.470

permanecerão posicionados do lado do paciente por todo o treino.

**Comentários e Considerações sobre a Pesquisa:**

O projeto apresenta as características éticas necessárias para realização da pesquisa.

**Considerações sobre os Termos de apresentação obrigatória:**

Foram apresentados os termos exigidos para aprovação da pesquisa.

Considerando que tratam-se de crianças com Síndrome de Down, não é necessário o TCLE específico para menores.

**Recomendações:**

O TCLE, embora apresente os aspectos exigidos, ele deve ser reescrito, uma vez que se encontra com uma linguagem estritamente técnica sobre os procedimentos que serão realizados na pesquisas, assim como constitui-se num documento muito longo (com 6 páginas).

**Conclusões ou Pendências e Lista de Inadequações:**

Recomenda-se reescrever o TCLE, adequando a linguagem (mais simples e acessível ao responsável pela criança participante)

Resumir as informações tomando o TCLE mais simplificado e objetivo.

Este parecer foi elaborado baseado nos documentos abaixo relacionados:

| Tipo Documento                                            | Arquivo                                      | Postagem               | Autor                     | Situação |
|-----------------------------------------------------------|----------------------------------------------|------------------------|---------------------------|----------|
| Informações Básicas do Projeto                            | PE_INFORMAÇÕES_BASICAS_DO_PROJETO_693482.pdf | 12/04/2016<br>15:41:42 |                           | Aceito   |
| Folha de Rosto                                            | DOC120416.pdf                                | 12/04/2016<br>15:40:49 | Jamile Benite Palma Lopes | Aceito   |
| Projeto Detalhado / Brochura Investigador                 | projetofinal.pdf                             | 06/04/2016<br>16:57:04 | Jamile Benite Palma Lopes | Aceito   |
| TCLE / Termos de Assentimento / Justificativa de Ausência | Termo.pdf                                    | 06/04/2016<br>16:46:17 | Jamile Benite Palma Lopes | Aceito   |
| Cronograma                                                | cronograma.pdf                               | 06/04/2016<br>16:45:48 | Jamile Benite Palma Lopes | Aceito   |

**Situação do Parecer:**

Pendente

**Necessita Apreciação da CONEP:**

Endereço: VERGUEIRO nº 235/240  
Bairro: LIBERDADE CEP: 01.504-001  
UF: SP Município: SAO PAULO  
Telefone: (11)3385-0107 E-mail: comitedeetica@uninove.br

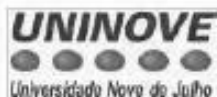

UNIVERSIDADE NOVE DE  
JULHO - UNINOVE

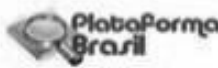

Continuação do Parecer: 1.517.470

Não

SAO PAULO, 27 de Abril de 2016

Assinado por:  
Stella Regina Zamuner  
(Coordenador)

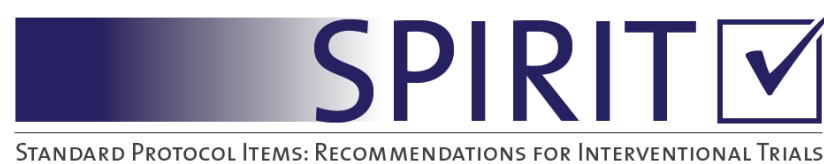

SPIRIT 2013 Checklist: Recommended items to address in a clinical trial protocol and related documents\*

| Section/item                      | Item No | Description                                                                                                                                                                                                                                                                              | Addressed on page number |
|-----------------------------------|---------|------------------------------------------------------------------------------------------------------------------------------------------------------------------------------------------------------------------------------------------------------------------------------------------|--------------------------|
| <b>Administrative information</b> |         |                                                                                                                                                                                                                                                                                          |                          |
| Title                             | 1       | Descriptive title identifying the study design, population, interventions, and, if applicable, trial acronym                                                                                                                                                                             | <u>01</u>                |
| Trial registration                | 2a      | Trial identifier and registry name. If not yet registered, name of intended registry                                                                                                                                                                                                     | <u>03-08-14</u>          |
|                                   | 2b      | All items from the World Health Organization Trial Registration Data Set                                                                                                                                                                                                                 | <u>14</u>                |
| Protocol version                  | 3       | Date and version identifier                                                                                                                                                                                                                                                              | <u>NA</u>                |
| Funding                           | 4       | Sources and types of financial, material, and other support                                                                                                                                                                                                                              | <u>15</u>                |
| Roles and responsibilities        | 5a      | Names, affiliations, and roles of protocol contributors                                                                                                                                                                                                                                  | <u>01-02-03</u>          |
|                                   | 5b      | Name and contact information for the trial sponsor                                                                                                                                                                                                                                       | <u>01-02-14</u>          |
|                                   | 5c      | Role of study sponsor and funders, if any, in study design; collection, management, analysis, and interpretation of data; writing of the report; and the decision to submit the report for publication, including whether they will have ultimate authority over any of these activities | <u>08-14</u>             |
|                                   | 5d      | Composition, roles, and responsibilities of the coordinating centre, steering committee, endpoint adjudication committee, data management team, and other individuals or groups overseeing the trial, if applicable (see Item 21a for data monitoring committee)                         | <u>14</u>                |

1 **Introduction** 05-06

2

3 Background and 6a Description of research question and justification for undertaking the trial, including summary of relevant 05-06

4 rationale studies (published and unpublished) examining benefits and harms for each intervention

5

6 6b Explanation for choice of comparators 07

7

8 Objectives 7 Specific objectives or hypotheses

9

10 Trial design 8 Description of trial design including type of trial (eg, parallel group, crossover, factorial, single group), 07-08

11 allocation ratio, and framework (eg, superiority, equivalence, noninferiority, exploratory)

12

13

14 **Methods: Participants, interventions, and outcomes**

15

16 Study setting 9 Description of study settings (eg, community clinic, academic hospital) and list of countries where data will 08

17 be collected. Reference to where list of study sites can be obtained

18

19 Eligibility criteria 10 Inclusion and exclusion criteria for participants. If applicable, eligibility criteria for study centres and 07

20 individuals who will perform the interventions (eg, surgeons, psychotherapists)

21

22 Interventions 11a Interventions for each group with sufficient detail to allow replication, including how and when they will be 12-13-14

23 administered

24

25 11b Criteria for discontinuing or modifying allocated interventions for a given trial participant (eg, drug dose NA

26 change in response to harms, participant request, or improving/worsening disease)

27

28 n 11c Strategies to improve adherence to intervention protocols, and any procedures for monitoring adherence NA

29 (eg, drug tablet return, laboratory tests)

30

31 11d Relevant concomitant care and interventions that are permitted or prohibited during the trial NA

32

33 Outcomes 12 Primary, secondary, and other outcomes, including the specific measurement variable (eg, systolic blood 12-13

34 pressure), analysis metric (eg, change from baseline, final value, time to event), method of aggregation (eg, median, proportion), and time point for each outcome. Explanation of the clinical relevance of chosen

35 efficacy and harm outcomes is strongly recommended

36

37

38 Participant timeline 13 Time schedule of enrolment, interventions (including any run-ins and washouts), assessments, and visits for 08-09 -10

39 participants. A schematic diagram is highly recommended (see Figure)

40

41

42

43

44

45

46

47

|   |             |    |                                                                                                                                                                                       |           |
|---|-------------|----|---------------------------------------------------------------------------------------------------------------------------------------------------------------------------------------|-----------|
| 1 | Sample size | 14 | Estimated number of participants needed to achieve study objectives and how it was determined, including clinical and statistical assumptions supporting any sample size calculations | <u>08</u> |
| 2 |             |    |                                                                                                                                                                                       |           |
| 3 |             |    |                                                                                                                                                                                       |           |
| 4 | Recruitment | 15 | Strategies for achieving adequate participant enrolment to reach target sample size                                                                                                   | <u>08</u> |
| 5 |             |    |                                                                                                                                                                                       |           |
| 6 |             |    |                                                                                                                                                                                       |           |

### 7 **Methods: Assignment of interventions (for controlled trials)**

#### 9 Allocation:

|    |                                  |     |                                                                                                                                                                                                                                                                                                                                                          |           |
|----|----------------------------------|-----|----------------------------------------------------------------------------------------------------------------------------------------------------------------------------------------------------------------------------------------------------------------------------------------------------------------------------------------------------------|-----------|
| 10 |                                  |     |                                                                                                                                                                                                                                                                                                                                                          |           |
| 11 | Sequence generation              | 16a | Method of generating the allocation sequence (eg, computer-generated random numbers), and list of any factors for stratification. To reduce predictability of a random sequence, details of any planned restriction (eg, blocking) should be provided in a separate document that is unavailable to those who enrol participants or assign interventions | <u>08</u> |
| 12 |                                  |     |                                                                                                                                                                                                                                                                                                                                                          |           |
| 13 |                                  |     |                                                                                                                                                                                                                                                                                                                                                          |           |
| 14 |                                  |     |                                                                                                                                                                                                                                                                                                                                                          |           |
| 15 |                                  |     |                                                                                                                                                                                                                                                                                                                                                          |           |
| 16 |                                  |     |                                                                                                                                                                                                                                                                                                                                                          |           |
| 17 | Allocation concealment mechanism | 16b | Mechanism of implementing the allocation sequence (eg, central telephone; sequentially numbered, opaque, sealed envelopes), describing any steps to conceal the sequence until interventions are assigned                                                                                                                                                | <u>08</u> |
| 18 |                                  |     |                                                                                                                                                                                                                                                                                                                                                          |           |
| 19 |                                  |     |                                                                                                                                                                                                                                                                                                                                                          |           |
| 20 |                                  |     |                                                                                                                                                                                                                                                                                                                                                          |           |
| 21 | Implementation                   | 16c | Who will generate the allocation sequence, who will enrol participants, and who will assign participants to interventions                                                                                                                                                                                                                                | <u>08</u> |
| 22 |                                  |     |                                                                                                                                                                                                                                                                                                                                                          |           |
| 23 |                                  |     |                                                                                                                                                                                                                                                                                                                                                          |           |
| 24 | Blinding (masking)               | 17a | Who will be blinded after assignment to interventions (eg, trial participants, care providers, outcome assessors, data analysts), and how                                                                                                                                                                                                                | <u>08</u> |
| 25 |                                  |     |                                                                                                                                                                                                                                                                                                                                                          |           |
| 26 |                                  |     |                                                                                                                                                                                                                                                                                                                                                          |           |
| 27 |                                  |     |                                                                                                                                                                                                                                                                                                                                                          |           |
| 28 |                                  | 17b | If blinded, circumstances under which unblinding is permissible, and procedure for revealing a participant's allocated intervention during the trial                                                                                                                                                                                                     | <u>08</u> |
| 29 |                                  |     |                                                                                                                                                                                                                                                                                                                                                          |           |
| 30 |                                  |     |                                                                                                                                                                                                                                                                                                                                                          |           |
| 31 |                                  |     |                                                                                                                                                                                                                                                                                                                                                          |           |

### 32 **Methods: Data collection, management, and analysis**

|    |                         |     |                                                                                                                                                                                                                                                                                                                                                                                                              |              |
|----|-------------------------|-----|--------------------------------------------------------------------------------------------------------------------------------------------------------------------------------------------------------------------------------------------------------------------------------------------------------------------------------------------------------------------------------------------------------------|--------------|
| 33 |                         |     |                                                                                                                                                                                                                                                                                                                                                                                                              |              |
| 34 | Data collection methods | 18a | Plans for assessment and collection of outcome, baseline, and other trial data, including any related processes to promote data quality (eg, duplicate measurements, training of assessors) and a description of study instruments (eg, questionnaires, laboratory tests) along with their reliability and validity, if known. Reference to where data collection forms can be found, if not in the protocol | <u>08-14</u> |
| 35 |                         |     |                                                                                                                                                                                                                                                                                                                                                                                                              |              |
| 36 |                         |     |                                                                                                                                                                                                                                                                                                                                                                                                              |              |
| 37 |                         |     |                                                                                                                                                                                                                                                                                                                                                                                                              |              |
| 38 |                         |     |                                                                                                                                                                                                                                                                                                                                                                                                              |              |
| 39 |                         |     |                                                                                                                                                                                                                                                                                                                                                                                                              |              |
| 40 |                         | 18b | Plans to promote participant retention and complete follow-up, including list of any outcome data to be collected for participants who discontinue or deviate from intervention protocols                                                                                                                                                                                                                    | <u>08-09</u> |
| 41 |                         |     |                                                                                                                                                                                                                                                                                                                                                                                                              |              |
| 42 |                         |     |                                                                                                                                                                                                                                                                                                                                                                                                              |              |
| 43 |                         |     |                                                                                                                                                                                                                                                                                                                                                                                                              |              |
| 44 |                         |     |                                                                                                                                                                                                                                                                                                                                                                                                              |              |
| 45 |                         |     |                                                                                                                                                                                                                                                                                                                                                                                                              |              |
| 46 |                         |     |                                                                                                                                                                                                                                                                                                                                                                                                              |              |
| 47 |                         |     |                                                                                                                                                                                                                                                                                                                                                                                                              |              |

|    |                                 |     |                                                                                                                                                                                                                                                                                                                                       |           |
|----|---------------------------------|-----|---------------------------------------------------------------------------------------------------------------------------------------------------------------------------------------------------------------------------------------------------------------------------------------------------------------------------------------|-----------|
| 1  | Data management                 | 19  | Plans for data entry, coding, security, and storage, including any related processes to promote data quality (eg, double data entry; range checks for data values). Reference to where details of data management procedures can be found, if not in the protocol                                                                     | <u>14</u> |
| 2  |                                 |     |                                                                                                                                                                                                                                                                                                                                       |           |
| 3  |                                 |     |                                                                                                                                                                                                                                                                                                                                       |           |
| 4  |                                 |     |                                                                                                                                                                                                                                                                                                                                       |           |
| 5  | Statistical methods             | 20a | Statistical methods for analysing primary and secondary outcomes. Reference to where other details of the statistical analysis plan can be found, if not in the protocol                                                                                                                                                              | <u>14</u> |
| 6  |                                 |     |                                                                                                                                                                                                                                                                                                                                       |           |
| 7  |                                 |     |                                                                                                                                                                                                                                                                                                                                       |           |
| 8  |                                 | 20b | Methods for any additional analyses (eg, subgroup and adjusted analyses)                                                                                                                                                                                                                                                              | <u>NA</u> |
| 9  |                                 |     |                                                                                                                                                                                                                                                                                                                                       |           |
| 10 |                                 | 20c | Definition of analysis population relating to protocol non-adherence (eg, as randomised analysis), and any statistical methods to handle missing data (eg, multiple imputation)                                                                                                                                                       | <u>NA</u> |
| 11 |                                 |     |                                                                                                                                                                                                                                                                                                                                       |           |
| 12 |                                 |     |                                                                                                                                                                                                                                                                                                                                       |           |
| 13 |                                 |     |                                                                                                                                                                                                                                                                                                                                       |           |
| 14 |                                 |     |                                                                                                                                                                                                                                                                                                                                       |           |
| 15 | <b>Methods: Monitoring</b>      |     |                                                                                                                                                                                                                                                                                                                                       |           |
| 16 |                                 |     |                                                                                                                                                                                                                                                                                                                                       |           |
| 17 | Data monitoring                 | 21a | Composition of data monitoring committee (DMC); summary of its role and reporting structure; statement of whether it is independent from the sponsor and competing interests; and reference to where further details about its charter can be found, if not in the protocol. Alternatively, an explanation of why a DMC is not needed | <u>NA</u> |
| 18 |                                 |     |                                                                                                                                                                                                                                                                                                                                       |           |
| 19 |                                 |     |                                                                                                                                                                                                                                                                                                                                       |           |
| 20 |                                 |     |                                                                                                                                                                                                                                                                                                                                       |           |
| 21 |                                 |     |                                                                                                                                                                                                                                                                                                                                       |           |
| 22 |                                 | 21b | Description of any interim analyses and stopping guidelines, including who will have access to these interim results and make the final decision to terminate the trial                                                                                                                                                               | <u>NA</u> |
| 23 |                                 |     |                                                                                                                                                                                                                                                                                                                                       |           |
| 24 |                                 |     |                                                                                                                                                                                                                                                                                                                                       |           |
| 25 |                                 |     |                                                                                                                                                                                                                                                                                                                                       |           |
| 26 | Harms                           | 22  | Plans for collecting, assessing, reporting, and managing solicited and spontaneously reported adverse events and other unintended effects of trial interventions or trial conduct                                                                                                                                                     | <u>09</u> |
| 27 |                                 |     |                                                                                                                                                                                                                                                                                                                                       |           |
| 28 |                                 |     |                                                                                                                                                                                                                                                                                                                                       |           |
| 29 | Auditing                        | 23  | Frequency and procedures for auditing trial conduct, if any, and whether the process will be independent from investigators and the sponsor                                                                                                                                                                                           | <u>NA</u> |
| 30 |                                 |     |                                                                                                                                                                                                                                                                                                                                       |           |
| 31 |                                 |     |                                                                                                                                                                                                                                                                                                                                       |           |
| 32 |                                 |     |                                                                                                                                                                                                                                                                                                                                       |           |
| 33 | <b>Ethics and dissemination</b> |     |                                                                                                                                                                                                                                                                                                                                       |           |
| 34 |                                 |     |                                                                                                                                                                                                                                                                                                                                       |           |
| 35 | Research ethics approval        | 24  | Plans for seeking research ethics committee/institutional review board (REC/IRB) approval                                                                                                                                                                                                                                             | <u>13</u> |
| 36 |                                 |     |                                                                                                                                                                                                                                                                                                                                       |           |
| 37 |                                 |     |                                                                                                                                                                                                                                                                                                                                       |           |
| 38 | Protocol amendments             | 25  | Plans for communicating important protocol modifications (eg, changes to eligibility criteria, outcomes, analyses) to relevant parties (eg, investigators, REC/IRBs, trial participants, trial registries, journals, regulators)                                                                                                      | <u>NA</u> |
| 39 |                                 |     |                                                                                                                                                                                                                                                                                                                                       |           |
| 40 |                                 |     |                                                                                                                                                                                                                                                                                                                                       |           |
| 41 |                                 |     |                                                                                                                                                                                                                                                                                                                                       |           |
| 42 |                                 |     |                                                                                                                                                                                                                                                                                                                                       |           |
| 43 |                                 |     |                                                                                                                                                                                                                                                                                                                                       |           |
| 44 |                                 |     |                                                                                                                                                                                                                                                                                                                                       |           |
| 45 |                                 |     |                                                                                                                                                                                                                                                                                                                                       |           |
| 46 |                                 |     |                                                                                                                                                                                                                                                                                                                                       |           |
| 47 |                                 |     |                                                                                                                                                                                                                                                                                                                                       |           |

|    |                               |     |                                                                                                                                                                                                                                                                                     |              |
|----|-------------------------------|-----|-------------------------------------------------------------------------------------------------------------------------------------------------------------------------------------------------------------------------------------------------------------------------------------|--------------|
| 1  | Consent or assent             | 26a | Who will obtain informed consent or assent from potential trial participants or authorised surrogates, and how (see Item 32)                                                                                                                                                        | <u>13</u>    |
| 2  |                               |     |                                                                                                                                                                                                                                                                                     |              |
| 3  |                               |     |                                                                                                                                                                                                                                                                                     |              |
| 4  |                               | 26b | Additional consent provisions for collection and use of participant data and biological specimens in ancillary studies, if applicable                                                                                                                                               | <u>NA</u>    |
| 5  |                               |     |                                                                                                                                                                                                                                                                                     |              |
| 6  |                               |     |                                                                                                                                                                                                                                                                                     |              |
| 7  | Confidentiality               | 27  | How personal information about potential and enrolled participants will be collected, shared, and maintained in order to protect confidentiality before, during, and after the trial                                                                                                | <u>13</u>    |
| 8  |                               |     |                                                                                                                                                                                                                                                                                     |              |
| 9  |                               |     |                                                                                                                                                                                                                                                                                     |              |
| 10 | Declaration of interests      | 28  | Financial and other competing interests for principal investigators for the overall trial and each study site                                                                                                                                                                       | <u>03-14</u> |
| 11 |                               |     |                                                                                                                                                                                                                                                                                     |              |
| 12 |                               |     |                                                                                                                                                                                                                                                                                     |              |
| 13 |                               |     |                                                                                                                                                                                                                                                                                     |              |
| 14 | Access to data                | 29  | Statement of who will have access to the final trial dataset, and disclosure of contractual agreements that limit such access for investigators                                                                                                                                     | <u>14</u>    |
| 15 |                               |     |                                                                                                                                                                                                                                                                                     |              |
| 16 |                               |     |                                                                                                                                                                                                                                                                                     |              |
| 17 | Ancillary and post-trial care | 30  | Provisions, if any, for ancillary and post-trial care, and for compensation to those who suffer harm from trial participation                                                                                                                                                       | <u>NA</u>    |
| 18 |                               |     |                                                                                                                                                                                                                                                                                     |              |
| 19 |                               |     |                                                                                                                                                                                                                                                                                     |              |
| 20 | Dissemination policy          | 31a | Plans for investigators and sponsor to communicate trial results to participants, healthcare professionals, the public, and other relevant groups (eg, via publication, reporting in results databases, or other data sharing arrangements), including any publication restrictions | <u>13</u>    |
| 21 |                               |     |                                                                                                                                                                                                                                                                                     |              |
| 22 |                               |     |                                                                                                                                                                                                                                                                                     |              |
| 23 |                               |     |                                                                                                                                                                                                                                                                                     |              |
| 24 |                               |     |                                                                                                                                                                                                                                                                                     |              |
| 25 |                               | 31b | Authorship eligibility guidelines and any intended use of professional writers                                                                                                                                                                                                      | <u>14</u>    |
| 26 |                               |     |                                                                                                                                                                                                                                                                                     |              |
| 27 |                               | 31c | Plans, if any, for granting public access to the full protocol, participant-level dataset, and statistical code                                                                                                                                                                     | <u>NA</u>    |
| 28 |                               |     |                                                                                                                                                                                                                                                                                     |              |
| 29 |                               |     |                                                                                                                                                                                                                                                                                     |              |
| 30 | <b>Appendices</b>             |     |                                                                                                                                                                                                                                                                                     |              |
| 31 |                               |     |                                                                                                                                                                                                                                                                                     |              |
| 32 | Informed consent materials    | 32  | Model consent form and other related documentation given to participants and authorised surrogates                                                                                                                                                                                  | <u>13</u>    |
| 33 |                               |     |                                                                                                                                                                                                                                                                                     |              |
| 34 |                               |     |                                                                                                                                                                                                                                                                                     |              |
| 35 | Biological specimens          | 33  | Plans for collection, laboratory evaluation, and storage of biological specimens for genetic or molecular analysis in the current trial and for future use in ancillary studies, if applicable                                                                                      | <u>NA</u>    |
| 36 |                               |     |                                                                                                                                                                                                                                                                                     |              |
| 37 |                               |     |                                                                                                                                                                                                                                                                                     |              |

\*It is strongly recommended that this checklist be read in conjunction with the SPIRIT 2013 Explanation & Elaboration for important clarification on the items. Amendments to the protocol should be tracked and dated. The SPIRIT checklist is copyrighted by the SPIRIT Group under the Creative Commons "[Attribution-NonCommercial-NoDerivs 3.0 Unported](https://creativecommons.org/licenses/by-nc-nd/3.0/)" license.

# BMJ Open

**Protocol study for a randomized, controlled, double-blind, clinical trial involving virtual reality and anodal transcranial direct current stimulation for the improvement of upper limb motor function in children with Down syndrome**

|                                 |                                                                                                                                                                                                                                                                                                                                                                                                                                                                                                                                                                                         |
|---------------------------------|-----------------------------------------------------------------------------------------------------------------------------------------------------------------------------------------------------------------------------------------------------------------------------------------------------------------------------------------------------------------------------------------------------------------------------------------------------------------------------------------------------------------------------------------------------------------------------------------|
| Journal:                        | <i>BMJ Open</i>                                                                                                                                                                                                                                                                                                                                                                                                                                                                                                                                                                         |
| Manuscript ID                   | bmjopen-2017-016260.R2                                                                                                                                                                                                                                                                                                                                                                                                                                                                                                                                                                  |
| Article Type:                   | Protocol                                                                                                                                                                                                                                                                                                                                                                                                                                                                                                                                                                                |
| Date Submitted by the Author:   | 03-Jul-2017                                                                                                                                                                                                                                                                                                                                                                                                                                                                                                                                                                             |
| Complete List of Authors:       | Lopes, Jamile; Universidade Nove de Julho, Grecco, Luanda<br>Moura, Renata; Universidade Nove de Julho<br>Lazzari, Roberta; Universidade Nove de Julho, Movement Analysis Lab<br>Duarte, Natalia<br>Miziara, Isabela ; Universidade Federal de Uberlandia, ucleus of Assistive Technologies (NTA) and Biomedical Engineering Laboratory (Biolab)<br>melo, Gileno Edu; Universidade do Estado do Para, Desporto; Universidade Nove de Julho,<br>Dumont, Arislander; Universidade Nove de Julho<br>Galli, Manuela; Politecnico di Milano,<br>Santos Oliveira, C; Nove de Julho University |
| <b>Primary Subject Heading</b>: | Neurology                                                                                                                                                                                                                                                                                                                                                                                                                                                                                                                                                                               |
| Secondary Subject Heading:      | Global health                                                                                                                                                                                                                                                                                                                                                                                                                                                                                                                                                                           |
| Keywords:                       | Down syndrome, transcranial direct current stimulation, upper limb.                                                                                                                                                                                                                                                                                                                                                                                                                                                                                                                     |
|                                 |                                                                                                                                                                                                                                                                                                                                                                                                                                                                                                                                                                                         |

SCHOLARONE™  
Manuscripts



1  
2  
3  
4  
5  
6  
7  
8  
9  
10  
11  
12  
13  
14  
15  
16  
17  
18  
19  
20  
21  
22  
23  
24  
25  
26  
27  
28  
29  
30  
31  
32  
33  
34  
35  
36  
37  
38  
39  
40  
41  
42  
43  
44  
45  
46  
47  
48  
49  
50  
51  
52  
53  
54  
55  
56  
57  
58  
59  
60

**Protocol study for a randomized, controlled, double-blind, clinical trial involving virtual reality and anodal transcranial direct current stimulation for the improvement of upper limb motor function in children with Down syndrome**

Jamile Benite Palma Lopes<sup>1</sup>, Luanda André Collange Grecco<sup>2</sup>, Renata Calhes Franco de Moura<sup>1</sup>, Roberta Delasta Lazzari<sup>1</sup>, Natalia de Almeida Carvalho Duarte<sup>1</sup>, Isabela Miziara<sup>3</sup>, Gileno Edu Lameira de Melo<sup>1</sup>, Arislander Jonathan Lopes Dumont<sup>1</sup>, Manuela Galli<sup>4</sup>, Claudia Santos Oliveira<sup>5</sup>

<sup>1</sup> Doctoral and Master Programs in Rehabilitation Sciences, Movement Analysis Lab, University Nove de Julho, Avenue Francisco Matarazzo, 612. 05001-000. São Paulo, São Paulo, Brazil. Email: [jamilepalma@yahoo.com.br](mailto:jamilepalma@yahoo.com.br), [robertalazzari@hotmail.com](mailto:robertalazzari@hotmail.com), [natycarvalho\\_fisio@hotmail.com](mailto:natycarvalho_fisio@hotmail.com), [gilenouepa@yahoo.com.br](mailto:gilenouepa@yahoo.com.br), [arislanderlg@gmail.com](mailto:arislanderlg@gmail.com) [franco.renata@terra.com.br](mailto:franco.renata@terra.com.br),

<sup>2</sup> Center of Pediatric Neurosurgery - CENEPE-Rehabilitation, Avenue Dr. Veiga Filho, 350.Cj 604. 01229-001. São Paulo - SP, Brazil and Post Doctoral student, NANI – Educação e Saúde na Infância e Adolescência, Unifesp, São Paulo - SP, Brazil. (+55 11 2528-2893). Email: [luandacollange@hotmail.com](mailto:luandacollange@hotmail.com)

<sup>3</sup> Doctoral Postgraduate Program in Electrical Engineering, Nucleus of Assistive Technologies (NTA) and Biomedical Engineering Laboratory (Biolab), Faculty of Electrical Engineering, Federal University of Uberlândia, UFU, Uberlândia - MG, Brazil [isabelammiziara@gmail.com](mailto:isabelammiziara@gmail.com)

<sup>4</sup> Department of Electronic Information and Bioengineering, Politecnico di Milano, Milan, Italy and IRCCS San Raffaele Pisana, Rome, Italy. Via Giuseppe Colombo, 40, 20133, Italy (+39 0223993338). Email: [manuela.galli@polimi.it](mailto:manuela.galli@polimi.it)

<sup>5</sup> Professor, Master and Doctoral Programs in Rehabilitation Sciences, Movement Analysis Lab, University Nove de Julho, Avenida Francisco Matarazzo, 612. 05001-000. São Paulo, São Paulo, Brazil. Email: [csantos@uninove.br](mailto:csantos@uninove.br)

**Authors' contributions**

All authors made substantial contributions.

Conceived and designed: JL LG RC HL ND IM GM AD MG CO. Contributed clinical expertise to the study design: JL LG RC HL ND IM GM AD MG CO. Contributed health systems expertise to the study design.: JL LG RC HL ND IM GM AD MG CO. Developed this study protocol.: JL LG RC HL ND IM GM AD MG CO Wrote the paper: JL LG RC HL ND IM GM AD MG CO. Final approval of the version: JL LG RC HL ND IM GM AD MG CO

For peer review only - <http://bmjopen.bmj.com/site/about/guidelines.xhtml>

**Corresponding author:**

Cláudia Santos Oliveira

Address: Rua Itapicuru, 380. Apto:111.

Perdizes. CEP: 05006-000, São Paulo, Brazil

The study received approval from the ethics committee of University Nove de Julho (Sao Paulo, Brazil) under protocol number 1.540.113 and is registered with the Brazilian Registry of Clinical Trials (RBR3PHPXB)

**The authors declare that there are no additional unpublished data from the study.**

**Word count: 5600**

## Abstract

**Introduction:** Down syndrome results in neuromotor impairment that affects selective motor control, compromising the acquisition of motor skills and functional independence. The aim of the proposed study is to evaluate and compare the effects of multiple-monopolar anodal transcranial direct current stimulation and sham stimulation over the primary motor cortex during upper limb motor training involving virtual reality on motor control, muscle activity, cerebral activity, and functional independence. **Methods and Analysis:** A randomized, controlled, double-blind, clinical trial is proposed. The calculation of the sample size will be defined based on the results of a pilot study involving the same methods. The participants will be randomly allocated to two groups. Evaluations will be conducted before and after the intervention as well as one month after the end of the intervention process. At each evaluation, three-dimensional, analysis of upper limb movement muscle activity will be measured using electromyography, cerebral activity will be measured using an electroencephalogram system, and intellectual capacity will be assessed using the Wechsler Intelligence Scale for Children. Virtual reality training will be performed three times a week (one 20-minute session per day) for a total of ten sessions. During the protocol, transcranial stimulation will be administered concomitantly to upper limb motor training. The results will be analyzed statistically, with a p-value  $\leq 0.05$  considered indicative of statistical significance. **Ethical aspects and publicity:** The present study received approval from the Institutional Review Board of *Universidade Nove de Julho* (Sao Paulo, Brazil) under process number 1.540.113 and is registered with the Brazilian Registry of Clinical Trials (N<sup>o</sup> RBR3PHPXB). The participating institutions have presented a declaration of participation. The volunteers will be permitted to drop out of the study at any time with no negative repercussions. The results will be published and will contribute evidence regarding the use of this type of intervention on children.

**Keywords:** Down syndrome; transcranial direct current stimulation; upper limb.

### Strengths and limitations of this study

The proposed project involves the combination of virtual reality (VR) activities for upper limb motor training and multiple-monopolar anodal transcranial direct current stimulation (tDCS) over the primary motor cortex with the aim of optimizing motor control and upper limb function in children with Down syndrome (DS).

1. Adequate upper limb motor control enables individuals to perform daily, functional, and academic activities in an independent fashion.
2. The use of RV activities to improve motor control is a promising therapeutic resource that has demonstrated satisfactory results in the scientific literature, including for individuals with DS.
3. Non-invasive brain stimulation techniques, specifically tDCS, are currently considered effective means to facilitate motor cortical excitability of brain regions underlying the stimulation electrode, leading to improvements in motor control and motor learning. Despite the lack of reports on the effects of transcranial stimulation in children with DS, studies involving pediatric patients have demonstrated that the technique is safe, with little or no adverse effects.
4. We believe that the administration of multiple-monopolar anodal transcranial direct current stimulation over the primary motor cortex, specifically the areas that correspond to upper limb motor control (C3 and C4 of the 10-20 electroencephalogram system) during upper limb motor training with the use of VR activities will enhance the cortical excitability of motor regions and optimize cerebral activity, thereby potentiating the effects of upper limb motor therapy.
5. The literature reports positive effects with the use of tDCS on upper limb movements in children with cerebral palsy. Optimizing such movements has a direct impact on improving one's performance of activities of daily living and functional independence. However, no scientific data were found regarding the use of tDCS during upper limb training in the population of the proposed study

1 (children with DS).

- 2
- 3 6. The literature also reports promising results with the use of VR regarding
- 4 improvements in cognitive aspects of the population in question, as this
- 5 intervention constitutes multisensory therapy that optimizes one's concentration
- 6 and assists in the anticipation of movements, thereby exerting an impact on
- 7 learning aspects in children submitted to this intervention.
- 8
- 9
- 10
- 11
- 12
- 13
- 14 7. The limitations of the proposed study regard the lack of scientific data from
- 15 previous studies involving children with DS for the purposes of comparison with
- 16 the findings obtained in the proposed study. However, this aspect also
- 17 demonstrates the importance of the data that will be generated in the proposed
- 18 study.
- 19
- 20
- 21
- 22
- 23
- 24
- 25
- 26
- 27
- 28
- 29
- 30
- 31
- 32
- 33
- 34
- 35
- 36
- 37
- 38
- 39
- 40
- 41
- 42
- 43
- 44
- 45
- 46
- 47
- 48
- 49
- 50
- 51
- 52
- 53
- 54
- 55
- 56
- 57
- 58
- 59
- 60

## 1. INTRODUCTION

Down syndrome (DS) is a highly prevalent genetic disease caused by the inheritance of an additional chromosome 21 and is one of the most frequent causes of mental impairment, affecting approximately 20% of the total number of individuals with mental disability.<sup>[1]</sup> The incidence in the United States is one out of every 700 births and it is estimated that at least 100 thousand individuals in Brazil are diagnosed with the syndrome.<sup>[2-4]</sup>

Structural and functional abnormalities are found in the nervous system of children with DS. Diffuse brain damage and peculiar electrical functioning during cognitive development result in poor analysis, synthesis, and speech skills. Moreover, such children demonstrate difficulties in selecting and directing a stimulus due to the fatigue of the connections. These abnormalities result in neurological disorders that vary in terms of manifestation and intensity.<sup>[5]</sup>

According to Flórez and Troncoso (1997), the brain of individuals with DS is smaller in volume in comparison to individuals without this condition. Hypoplasia of the frontal and occipital lobes is a common finding. A unilateral or bilateral reduction in the temporal lobe occurs in up to 50% of cases and reductions in the corpus callosum, anterior commissure, and hippocampus are found.<sup>[6-7]</sup> Such individuals also have a smaller number of secondary sulci in comparison to individuals without this syndrome, the temporal gyri are underdeveloped and differences in nerve cells are also reported. For instance, Pandilla (1976) reports differences in the axons and dendrites of pyramidal neurons in the motor cortex.<sup>[8]</sup> Such differences are highly correlated with fragmentation problems and necrosis of these branches as well as differences in the electrical activity of the brain.<sup>[9]</sup> This problem leads to limitations with regard to synaptic connections and the neural transmission of nerve impulses.

The literature also reports atrophied nerve cells, which are likely associated with lags

For peer review only - <http://bmjopen.bmj.com/site/about/guidelines.xhtml>  
during the integration of visual and spatial information. According to Block (1991),

1 individuals with DS also have a smaller cerebellum and base ganglia, which are related to  
2 the control of coordination, timing, and balance. Such problems imply limitations with  
3 regard to the acquisition of motor skills.<sup>[10]</sup> According to Bomono & Rosetti (2010),  
4 neuromotor abnormalities in DS include hypotonia, diminished primitive reflexes, delayed  
5 motor and cognitive development, and lower levels of learning.<sup>[11]</sup>

6  
7  
8  
9  
10  
11  
12 Seaman and DePauw (1982) propose a model in which reaching phases of  
13 fundamental movements and culturally determined movements is conditioned by the  
14 achievement of previous development phases.<sup>[9]</sup> As this population exhibits problems with  
15 regard to systems of early-onset and late-onset maturation, children with DS could  
16 encounter difficulties reaching the phase of sensory-motor responses and even acquiring  
17 motor skills. According to Connolly (1970), the mechanisms or systems that offer support  
18 to development and the acquisition of motor skills can be understood using the concepts of  
19 “hardware” and “software”, in which changes in “hardware” regard structure, such as the  
20 myelinization that occurs in axons, whereas changes in “software” regard function, such as  
21 a gain in information processing speed as a result of myelinization; thus, individuals with  
22 DS have problems with their “hardware” that have repercussions on their “software”.<sup>[12]</sup>  
23 “Hardware” problems lead to limitations with regard to physical and motor aspects, which  
24 is an important problem, as both physical proficiency and perceptive-motor proficiency  
25 contribute to the acquisition and performance of motor skills. In other words, it is possible  
26 that problems with balance, timing, and agility constitute a hindrance to the acquisition of  
27 fundamental patterns or specialized skills.<sup>[13]</sup>

28  
29  
30  
31  
32  
33  
34  
35  
36  
37  
38  
39  
40  
41  
42  
43  
44  
45  
46  
47  
48 The population with DS exhibits abnormal muscle coordination, difficulty processing  
49 sensory information and functional limitations. The upper limb dysfunctions in this  
50 population (muscle weakness and hypotonus, slow reflexes, abnormal biomechanics,  
51 sensory deficiency) exert a negative impact on the performance of activities of daily  
52 living, independence and quality of life.<sup>[14]</sup>

53  
54  
55  
56  
57  
58  
59  
60  
61  
62  
63  
64  
65  
66  
67  
68  
69  
70  
71  
72  
73  
74  
75  
76  
77  
78  
79  
80  
81  
82  
83  
84  
85  
86  
87  
88  
89  
90  
91  
92  
93  
94  
95  
96  
97  
98  
99  
100  
101  
102  
103  
104  
105  
106  
107  
108  
109  
110  
111  
112  
113  
114  
115  
116  
117  
118  
119  
120  
121  
122  
123  
124  
125  
126  
127  
128  
129  
130  
131  
132  
133  
134  
135  
136  
137  
138  
139  
140  
141  
142  
143  
144  
145  
146  
147  
148  
149  
150  
151  
152  
153  
154  
155  
156  
157  
158  
159  
160  
161  
162  
163  
164  
165  
166  
167  
168  
169  
170  
171  
172  
173  
174  
175  
176  
177  
178  
179  
180  
181  
182  
183  
184  
185  
186  
187  
188  
189  
190  
191  
192  
193  
194  
195  
196  
197  
198  
199  
200  
201  
202  
203  
204  
205  
206  
207  
208  
209  
210  
211  
212  
213  
214  
215  
216  
217  
218  
219  
220  
221  
222  
223  
224  
225  
226  
227  
228  
229  
230  
231  
232  
233  
234  
235  
236  
237  
238  
239  
240  
241  
242  
243  
244  
245  
246  
247  
248  
249  
250  
251  
252  
253  
254  
255  
256  
257  
258  
259  
260  
261  
262  
263  
264  
265  
266  
267  
268  
269  
270  
271  
272  
273  
274  
275  
276  
277  
278  
279  
280  
281  
282  
283  
284  
285  
286  
287  
288  
289  
290  
291  
292  
293  
294  
295  
296  
297  
298  
299  
300  
301  
302  
303  
304  
305  
306  
307  
308  
309  
310  
311  
312  
313  
314  
315  
316  
317  
318  
319  
320  
321  
322  
323  
324  
325  
326  
327  
328  
329  
330  
331  
332  
333  
334  
335  
336  
337  
338  
339  
340  
341  
342  
343  
344  
345  
346  
347  
348  
349  
350  
351  
352  
353  
354  
355  
356  
357  
358  
359  
360  
361  
362  
363  
364  
365  
366  
367  
368  
369  
370  
371  
372  
373  
374  
375  
376  
377  
378  
379  
380  
381  
382  
383  
384  
385  
386  
387  
388  
389  
390  
391  
392  
393  
394  
395  
396  
397  
398  
399  
400  
401  
402  
403  
404  
405  
406  
407  
408  
409  
410  
411  
412  
413  
414  
415  
416  
417  
418  
419  
420  
421  
422  
423  
424  
425  
426  
427  
428  
429  
430  
431  
432  
433  
434  
435  
436  
437  
438  
439  
440  
441  
442  
443  
444  
445  
446  
447  
448  
449  
450  
451  
452  
453  
454  
455  
456  
457  
458  
459  
460  
461  
462  
463  
464  
465  
466  
467  
468  
469  
470  
471  
472  
473  
474  
475  
476  
477  
478  
479  
480  
481  
482  
483  
484  
485  
486  
487  
488  
489  
490  
491  
492  
493  
494  
495  
496  
497  
498  
499  
500  
501  
502  
503  
504  
505  
506  
507  
508  
509  
510  
511  
512  
513  
514  
515  
516  
517  
518  
519  
520  
521  
522  
523  
524  
525  
526  
527  
528  
529  
530  
531  
532  
533  
534  
535  
536  
537  
538  
539  
540  
541  
542  
543  
544  
545  
546  
547  
548  
549  
550  
551  
552  
553  
554  
555  
556  
557  
558  
559  
560  
561  
562  
563  
564  
565  
566  
567  
568  
569  
570  
571  
572  
573  
574  
575  
576  
577  
578  
579  
580  
581  
582  
583  
584  
585  
586  
587  
588  
589  
590  
591  
592  
593  
594  
595  
596  
597  
598  
599  
600  
601  
602  
603  
604  
605  
606  
607  
608  
609  
610  
611  
612  
613  
614  
615  
616  
617  
618  
619  
620  
621  
622  
623  
624  
625  
626  
627  
628  
629  
630  
631  
632  
633  
634  
635  
636  
637  
638  
639  
640  
641  
642  
643  
644  
645  
646  
647  
648  
649  
650  
651  
652  
653  
654  
655  
656  
657  
658  
659  
660  
661  
662  
663  
664  
665  
666  
667  
668  
669  
670  
671  
672  
673  
674  
675  
676  
677  
678  
679  
680  
681  
682  
683  
684  
685  
686  
687  
688  
689  
690  
691  
692  
693  
694  
695  
696  
697  
698  
699  
700  
701  
702  
703  
704  
705  
706  
707  
708  
709  
710  
711  
712  
713  
714  
715  
716  
717  
718  
719  
720  
721  
722  
723  
724  
725  
726  
727  
728  
729  
730  
731  
732  
733  
734  
735  
736  
737  
738  
739  
740  
741  
742  
743  
744  
745  
746  
747  
748  
749  
750  
751  
752  
753  
754  
755  
756  
757  
758  
759  
760  
761  
762  
763  
764  
765  
766  
767  
768  
769  
770  
771  
772  
773  
774  
775  
776  
777  
778  
779  
780  
781  
782  
783  
784  
785  
786  
787  
788  
789  
790  
791  
792  
793  
794  
795  
796  
797  
798  
799  
800  
801  
802  
803  
804  
805  
806  
807  
808  
809  
810  
811  
812  
813  
814  
815  
816  
817  
818  
819  
820  
821  
822  
823  
824  
825  
826  
827  
828  
829  
830  
831  
832  
833  
834  
835  
836  
837  
838  
839  
840  
841  
842  
843  
844  
845  
846  
847  
848  
849  
850  
851  
852  
853  
854  
855  
856  
857  
858  
859  
860  
861  
862  
863  
864  
865  
866  
867  
868  
869  
870  
871  
872  
873  
874  
875  
876  
877  
878  
879  
880  
881  
882  
883  
884  
885  
886  
887  
888  
889  
890  
891  
892  
893  
894  
895  
896  
897  
898  
899  
900  
901  
902  
903  
904  
905  
906  
907  
908  
909  
910  
911  
912  
913  
914  
915  
916  
917  
918  
919  
920  
921  
922  
923  
924  
925  
926  
927  
928  
929  
930  
931  
932  
933  
934  
935  
936  
937  
938  
939  
940  
941  
942  
943  
944  
945  
946  
947  
948  
949  
950  
951  
952  
953  
954  
955  
956  
957  
958  
959  
960  
961  
962  
963  
964  
965  
966  
967  
968  
969  
970  
971  
972  
973  
974  
975  
976  
977  
978  
979  
980  
981  
982  
983  
984  
985  
986  
987  
988  
989  
990  
991  
992  
993  
994  
995  
996  
997  
998  
999  
1000

Studies have been conducted to understand why individuals with DS have slow, unharmonious movements.<sup>[15, 26]</sup> The investigation of electromyographic activity and

8  
1 muscle torque demonstrates this deficiency, which can be corrected by the repetition of a  
2 given movement during motor training activities. Motor control strategies used in the  
3 execution of complex activities, such as a reaching task, have been investigated in this  
4 population.<sup>[15-25]</sup>  
5  
6  
7  
8  
9

10 The positive results achieved with virtual reality (VR) are believed to be related  
11 to training in an interactive environment that provides a broad range of activities and  
12 scenarios with multiple sensory channels, enabling the creation of exercises at an intensity  
13 that is promising for the needs of individuals with DS.<sup>[26-28]</sup> VR can be used as an  
14 auxiliary tool involving a playful, motivational objective that can facilitate the  
15 development of perceptions and motor skills through the training of planning skills and  
16 motor control as well as stimulation of the plasticity of the central nervous system.<sup>[ 27-28]</sup>  
17  
18  
19  
20  
21  
22  
23  
24  
25

26 Non-invasive brain stimulation methods have been employed in physical rehabilitation  
27 protocols due to the promising results achieved with regard to motor learning, in the pediatric  
28 population with cerebral palsy since it was never used in DS.<sup>[29-30]</sup> Transcranial direct current  
29 stimulation (tDCS) is a relatively low-cost, noninvasive brain stimulation technique that is  
30 easy to administer and offers minimal adverse effects. This method is known to produce  
31 lasting changes in motor cortical excitability.<sup>[31]</sup> Cortical modulation depends on the polarity  
32 of the current: anodal stimulation increases cortical excitability, favoring the depolarization  
33 of the neuronal membrane, whereas cathodal stimulation has an inhibitory effect due to the  
34 hyperpolarization of the neuronal membrane.<sup>[31-36]</sup>  
35  
36  
37  
38  
39  
40  
41  
42  
43  
44  
45

46 TDCS has advantages over other transcranial stimulation techniques, such as  
47 providing a long-lasting modulating effect on cortical function as well as its ease of use  
48 because its device is portable, so it is possible to be used simultaneously with rehabilitation  
49 techniques and has Lower cost. The results of clinical trials have demonstrated its  
50 considerable potential in the treatment of neurological disorders and the investigation of  
51 processes of cortical excitability modulation<sup>[37-42]</sup>. Moreover, this type of intervention offers  
52 a better condition for sham stimulation, which confers greater specificity to the findings.<sup>[39-</sup>  
53  
54  
55  
56  
57  
58  
59  
60

**For peer review only - <http://bmjopen.bmj.com/site/about/guidelines.xhtml>**  
40] In the rehabilitation process, the aim of neuromodulating techniques is to enhance local



1 synaptic efficiency and alter the maladaptive plasticity pattern that emerges after a cortical  
2  
3 injury.<sup>[41-45]</sup>  
4

5 Although DS is one of the most prevalent diseases in the pediatric population, no  
6  
7 studies were found on the effects of tDCS on children with this syndrome. Thus, the lack of  
8  
9 investigations on anodal tDCS over the primary motor cortex during motor training for  
10  
11 children with DS constitutes a gap in the scientific literature.<sup>[46-48]</sup> Considering the high  
12  
13 prevalence of DS, the motor limitations stemming from this disease, which exert a negative  
14  
15 impact on functionality and independence, and the fact that tDCS is not contraindicated in  
16  
17 most cases of this syndrome, the investigation of the effects of this noninvasive brain  
18  
19 stimulation technique on children with DS is relevant.<sup>[43-45]</sup>  
20  
21  
22

23 The proposed study could be used as the basis for the development of further projects  
24  
25 conducted to broaden knowledge on this technique, enabling a novel intervention option for  
26  
27 the optimization of motor training in individuals with DS.  
28  
29  
30  
31  
32  
33  
34  
35  
36  
37  
38  
39  
40  
41  
42  
43  
44  
45  
46  
47  
48  
49  
50  
51  
52  
53  
54  
55  
56  
57  
58  
59  
60

## 2. OBJECTIVES

### 2.1 Primary objective

The aim of the proposed study is to evaluate and compare the effect of multiple-monopolar anodal tDCS and sham stimulation over the primary motor cortex during upper limb motor training involving VR on motor control (spatiotemporal variables and kinematics of a reaching task), activity of the elbow flexors and extensors, cerebral activity and functional independence in children with DS.

#### 2.1.1 HYPOTHESES

**Null hypothesis:** Ten sessions of tDCS over the motor cortex concomitantly to upper limb motor training involving the use of VR activities will result in the same effects as motor training with the use of virtual reality combined with sham transcranial stimulation in children with DS

**Alternative hypothesis:** Ten sessions of tDCS over the motor cortex concomitantly to upper limb motor training involving the use of virtual reality activities will result in the better effects than motor training with the use of VR combined with sham tDCS in children with DS.

### 2.2 Secondary objectives

- Determine possible correlations between upper limb motor control (movement velocity and total duration of movement) and muscle activity (elbow flexors and extensors), cerebral activity (activity of the parietal lobe, specifically regions C3 and C4) and functional independence with regard to self-care.

- Identify possible prediction factors for the response of upper limb motor control (movement velocity and total duration of movement) in children with DS. Muscle activity of elbow flexors and extensors, cerebral activity (areas C3 and C4 of the 10-20 electroencephalogram system) and tDCS (active and sham) will be the factors investigated.

### 3. METHODS AND ANALYSIS

The sample will be composed of children with DS recruited from the physical therapy clinics of *Universidade Nove de Julho*, São Paulo, Brazil. Letters and emails will be sent to pediatricians, physiotherapists and pediatric neurologists to divulge the study. The following will be the inclusion criteria: 1) a diagnosis of DS; 2) adequate comprehension and cooperation during the procedures; 3) age six to 12 years; 4) compromised upper limb motor coordination; and 5) statement of informed consent signed by a legal guardian. The exclusion criteria will be 1) having undergone surgical procedures in the 12 months prior to the onset of the training sessions, 2) orthopedic deformity of the lower limbs or spinal column with an indication for surgery, 3) epilepsy, 4) metal implant in skull or hearing aids, 5) associated neurological disorder, and 6) use of a pacemaker.

#### 3.1 Study Design

A Phase I-II study will be conducted (figure 1): analytical, paired, randomized, controlled, double-blind, clinical trial

#### 3.2 Sample size

The sample size will be calculated based on the results of a pilot study with the same methods as those of the main study. The pilot study will involve ten children randomly allocated to the experimental and control groups (five children in each group). The sample size will be calculated based on the mean of both groups considering total duration of movement as the primary outcome, with a unidirectional alpha of 0.05 and an 80% power. The sample will be increased by 20% to compensate for possible dropouts.

#### 3.3 Randomization

Patients with DS who meet the eligibility criteria and agree to participate in the study will be submitted to an initial evaluation and will then be randomly allocated to two groups using a randomization method available at the site [www.randomizacion.com](http://www.randomizacion.com). This process will be performed by a member of the research team who is not involved in the recruitment or development of the study. During the protocol, the blinding of the main researcher will be ensured with the use of the DC-Stimulator (NeuroConn, Germany), which has active and sham modes that function based on encrypted code, with three configurations to choose so that the more complex conditions of the study can be achieved. The parameters are adjusted individually and the activated mode can only be altered by the programmer.

1  
2  
3 Experimental group: multiple-monopolar anodal tDCS over the primary motor cortex  
4 bilaterally combined with upper limb motor training involving the use of VR;

5  
6 Control group: sham tDCS over the primary motor cortex bilaterally combined with  
7 upper limb motor training involving the use of VR.  
8  
9

### 10 **3.4 Evaluations**

11 The participants will be submitted to three evaluations: Pre-intervention, post-  
12 evaluation (after ten training sessions), and follow up (one month after last training  
13 session).  
14  
15

#### 16 **3.4.1 Three-dimensional movement analysis:**

17 Three-dimensional analysis of upper limb movement: the kinematics of upper limb  
18 movement will be evaluated using the SMART-D 140® system (BTS, Milan, Italy), with  
19 eight cameras sensitive to infrared light, a sampling frequency of 100 Hz and video system  
20 synchronized with the SMART-D system. Passive markers will be positioned at anatomic  
21 references points directly on the skin with specific adhesive tape, following the protocol  
22 of the *SMARTup: The experimental setup* (figure 2).<sup>[49-51]</sup> A total of 18 markers measuring  
23 15 mm in diameter will be used to identify the position of the head, trunk and upper  
24 limbs (upper arm, forearm and hand).  
25  
26

27 The movement will be divided into three phases: going phase (upper limb moving  
28 toward the target), adjusting phase (adjustment of arm to locate target precisely) and  
29 returning phase (return to initial position). At least six complete movements will be  
30 performed to obtain three adequate cycles for analysis (figure 3). The biomechanical  
31 model, filtering of the data, and processing of the variables will be performed using the  
32 *SMART analyser* software program (BTS, Milan, Italy). The variables will be identified  
33 and calculated for each movement cycle to evaluate any changes that occur after the  
34 intervention. The following variables will be considered, with the mean of the results  
35 used in the statistical analyses:  
36  
37

- 38 • Total duration of movement: total time required to perform the complete reaching  
39 task.
  - 40 • Mean movement velocity: computed during the going phase and determined using  
41 the marker positioned on the index finger.
  - 42 • Adjusting sway index: Defined as the length of the three-dimensional path  
43 described by the marker on the index finger during the adjusting phase.
  - 44 • Range of motion of elbow and shoulder: calculated as the difference between the  
45 maximum and minimum angles of the elbow and shoulder on the sagittal (elbow and  
46 shoulder) and frontal (shoulder) planes during the going phase, as described in the  
47 literature.<sup>[49-51]</sup>
- 48  
49  
50  
51  
52  
53  
54  
55  
56  
57  
58  
59  
60

1  
2  
3  
4  
5  
6  
7  
8  
9  
10  
11  
12  
13  
14  
15  
16  
17  
18  
19  
20  
21  
22  
23  
24  
25  
26  
27  
28  
29  
30  
31  
32  
33  
34  
35  
36  
37  
38  
39  
40  
41  
42  
43  
44  
45  
46  
47  
48  
49  
50  
51  
52  
53  
54  
55  
56  
57  
58  
59  
60

**Figure 2:** Placement of markers for three-dimensional analysis using *SMARTup: The experimental setup* <sup>[49]</sup>

**Figure 3:** Phases of reaching cycle <sup>[49]</sup>

**3.4.2 Electromyographic (EMG) analysis:** Muscle activity during the reaching movement will be determined using EMG. The electrical activity resulting from the activation of the elbow flexors and extensors will be collected using an eight-channel electromyograph (FREEEMG<sup>®</sup>, BTS Engineering) with a bioelectrical signal amplifier, wireless data transmission and bipolar electrodes with a total gain of 2000 fold and frequency ranging from 20 to 450 Hz. Impedance and the common rejection mode ratio of the equipment are  $> 10^{15} \Omega/0.2 \text{ pF}$  and 60/10Hz 92 dB, respectively. The motor point of the muscles will be identified for the placement of the electrodes and the skin will be cleaned with 70% alcohol to reduce bioimpedance, following the recommendations of Surface Electromyography for the Non-Invasive Assessment of Muscles.<sup>[52]</sup> All EMG data will be digitized at 1000 frames per second using the BTS MYOLAB<sup>®</sup> software program. The data will be collected simultaneously to the kinematic data and both will be managed using the BTS<sup>®</sup> system and *Smart Capture*<sup>®</sup> software program.<sup>[52-53]</sup>

**3.4.3 Electroencephalographic analysis:** Brain activity will be investigated using electroencephalography (EEG), which will be performed during both the three-dimensional analysis of the reaching task and the evaluation of muscle activation using EMG. For such, the volunteer will be seated in an erect position on a chair in front of the table on which the reaching task will be performed. The BrainNet BNT36 device with 36 configurable channels (32 AC and four DC) and a 16-bit analog-digital converter will be used for the acquisition of the EEG signal (figure 4). The analysis of the signal will be performed with the aid of the EEGLab tool implemented on Matlab, which is also capable of furnishing a topographic map of cerebral activity as a function of time. The electrodes will be positioned following the guidelines of the 10/20 electroencephalogram system (figure 5).<sup>[54-55]</sup>

1  
2  
3  
4  
5  
6  
7  
8  
9  
10  
11  
12  
13  
14  
15  
16  
17  
18  
19  
20  
21  
22  
23  
24  
25  
26  
27  
28  
29  
30  
31  
32  
33  
34  
35  
36  
37  
38  
39  
40  
41  
42  
43  
44  
45  
46  
47  
48  
49  
50  
51  
52  
53  
54  
55  
56  
57  
58  
59  
60

**3.4.5 Pediatric Evaluation of Disability Inventory (PEDI):** The children's functional performance will be assessed quantitatively using the PEDI, which is a questionnaire administered in interview format to a caregiver who can provide information regarding the child's performance on typical activities and routine tasks. The PEDI is composed of three parts, the first of which is used to evaluate skills grouped into three functional domains: self-care (73 items), mobility (59 items) and social function (65 items). Each item is scored either zero (not part of the child's repertoire) or 1 (part of the child's repertoire). The scores are then totaled per domain.<sup>[56-58]</sup>

**3.4.6 Wechsler Intelligence Scale for Children:** The Wechsler Intelligence Scale (WIS) was developed for the assessment of the intellectual performance of adults. The WISC was developed as a version for children, which was followed by the revised version, WISC-R. The WISC III is the third version of the scale for children and is used to assess intellectual capacity using 13 subtests, 12 from earlier versions and one additional subtest. The subtests are organized into two groups (verbal and perceptivo-motor or execution) and are administered in alternating order. The verbal subtests are Information, Similarities, Arithmetic, Vocabulary, Comprehension and Digits. The execution group is composed of Matrix Reasoning, Coding, Figure Weights, Block Design, Picture Concepts, Symbol Search and Mazes. Many studies have been conducted and, although improvements have been made with the addition of new items, the fundamental characteristics of the WISC and WISC-R remained the same in WISC III.<sup>[59]</sup>

## 4. Procedures

### 4.1 Intervention protocol

The therapeutic intervention will consist of a combination of tDCS and VR during reaching movements. The protocol will follow safety procedures described in the literature for the use of tDCS on the pediatric population.<sup>[29,60,51]</sup> Three 20-minute sessions of combined therapy (tDCS concomitantly to upper limb motor training) will be held for a total of ten sessions.<sup>[29,30,39,40]</sup>

### 4.2 Transcranial direct current stimulation

Stimulation will be administered using a tDCS device (*DC-Stimulator NeuroConn*, Germany), with three sponge (non-metallic) surface electrodes measuring 25 cm<sup>2</sup> (5 x 5 cm) soaked in saline solution.<sup>[61-62]</sup> The children will be randomly allocated to two types of treatment: 1) active anodal stimulation over the primary cortex bilaterally; and 2) sham transcranial stimulation. The two anodal electrodes will be positioned over C3 and C4 of the 10-20 international electroencephalogram system<sup>[62]</sup> and the cathode will be positioned over the right deltoid muscle. This montage will enable the child to receive multiple-monopolar anodal tDCS over the primary motor cortex, specifically the area that manages upper limb motor control, while minimizing the effect of cathodal stimulation in the brain.<sup>[61-63]</sup> A current of 1 mA (current density: 0.029 mA/cm<sup>2</sup>) will be administered over the primary motor cortex for 20 minutes during upper limb training.<sup>[29,30,39,41]</sup> The stimulator has a button that allows the operator to control the intensity of the current. At the beginning of the session, stimulation will be increased gradually until reaching 1 mA and gradually diminished during the final ten seconds of the session. Sham stimulation will consist of the same electrode montage and the stimulator will be switched on for 30 seconds, giving the child the initial sensation of stimulation, but no current will be administered during the remainder of the session. This is considered a valid control procedure in studies involving tDCS.<sup>[64-65]</sup>

1  
2  
3  
4  
5  
6  
7  
8  
9  
10  
11  
12  
13  
14  
15  
16  
17  
18  
19  
20  
21  
22  
23  
24  
25  
26  
27  
28  
29  
30  
31  
32  
33  
34  
35  
36  
37  
38  
39  
40  
41  
42  
43  
44  
45  
46  
47  
48  
49  
50  
51  
52  
53  
54  
55  
56  
57  
58  
59  
60

**Adverse effects:** Potential adverse effects of tDCS will be evaluated at the end of each session using a questionnaire administered to the child. The questionnaire will address the perception of symptoms having occurred during the session, such as tingling, a burning sensation, headache, pain at the electrode sites, sleepiness, and altered mood. The children will be instructed to answer using a three-point scale. The caregivers and children will also be asked open-ended questions at the beginning of each session regarding the occurrence of headache, scalp pain, burning sensations, redness of the skin, sleepiness, difficulty concentrating, and mood swings during periods between sessions.

### 4.3 Virtual reality training protocol

Training sessions will be held three times per week on non-consecutive days. Each session will last 20 minutes and will involve the use of the XBOX 360™ with the Kinect™ motion detector.<sup>[66]</sup> The game entitled “Bursting Bubbles” of the Adventure set of games was chosen based on the potential to stimulate cognitive skills and enhance execution time, motor coordination, attention, concentration, reasoning, memory, persistence, and precise movement. The activity will be held in a specific room of the Integrated Human Movement Analysis Laboratory measuring 2.5 x 4.0 m, with a projection screen (200 x 150 cm) attached to the wall and stereo speakers to provide adequate visual and auditory stimuli. Initially, the child will be instructed to remain standing at a distance of two to three meters in front of the motion detector to capture the movements better as well as for the estimation of height and calculation of the body mass index. Two mobility training sessions with the use of the XBOX 360 exercises will be performed prior to the onset of the intervention protocol. Records will be made of the number of sessions attended and duration of each session.<sup>[66-68]</sup>



## 5. Analysis of results

The Shapiro-Wilk test will be used to determine whether the data adhere to the Gaussian curve. Parametric variables will be expressed as mean and standard deviation. Nonparametric variables will be expressed as median and interquartile range. Effect sizes will be calculated from the differences in means between the pre-intervention and post-intervention evaluations. The effect size values will be expressed with respective 95% confidence intervals. Either two-way ANOVA (parametric variables) or the Kruskal-Wallis test (non-parametric variables) will be used for the analysis of the effects of the upper limb motor training activity with active and sham tDCS. Logistic regression models will be created to determine factors predictive of the response to the intervention. For such, movement velocity and total duration of movement will be considered. The response capacity will be defined as a clinically significant increase in performance in comparison to baseline. The independent variables will be age (years), sex (male/female), activity of elbow flexors and extensors, cerebral activity (C3 and C4) and functional independence (aspects of self-care). Univariate regressions will be performed for each variable. Based on the initial analyses, the predictors associated with the outcome with a p-value  $\leq 0.05$  will be incorporated into the multivariate model. Moreover, Pearson's correlation coefficients will be calculated to determine correlations among the variables analyzed. A p-value  $< 0.05$  will be considered indicative of statistical significance. The data will be organized and tabulated with the aid of the Statistical Package for the Social Sciences (SPSS v.19.0).

## 6. Discussion

Upper limb motor control enables individuals to perform functional activities. VR will be used as a therapeutic tool to enhance motor control.<sup>[29-30]</sup> Moreover, a noninvasive brain stimulation method (tDCS) will be employed to facilitate motor cortical excitability in the areas subjacent to stimulation to enhance the effects of motor control and learning.<sup>[37-42]</sup> Lazzari et al. (2016) demonstrated the efficacy of the combination of tDCS and VR in potentiating motor effects on balance and functional mobility in children with cerebral palsy.<sup>[37]</sup>

This document offers a detailed description of a randomized, controlled, double-blind, clinical trial designed to determine the effectiveness of VR training combined with tDCS on upper limb movements in individuals with DS

## 7. Ethical aspects and divulgation

The present study is in compliance with the guidelines regulating studies involving human subjects established by the Brazilian National Board of Health in October 1996 and updated in Resolution 466 in 2012. The study will be developed at the Integrated Human Movement Analysis Laboratory of University *Nove de Julho* (Sao Paulo, Brazil) and has received approval from the Human Research Ethics Committee of the university under process number 1.517.470 (APPENDIX 1). The protocol has been registered with Clinical Trials. All legal guardians will receive clarifications regarding the procedures and will be aware that participation is voluntary, free of cost and experimental. Those who agree to their child's participation will sign a statement of informed consent (APPENDIX 2). The guardians will be assured of access to all information and will be informed of the possibility of dropping out of the study or withdrawing consent at any time with no negative consequences. The anonymity of the children and the confidentiality of their information will be ensured, following the ethical principles of privacy. The findings will be published and will contribute evidence regarding the use of transcranial direct current stimulation combined with upper limb motor training in this population.

## 8. Conflict of Interest Statement

The authors have no financial or competing interests

## 9. Acknowledgments

The authors gratefully acknowledge financial support from the Brazilian fostering agencies Foundation for Research Support (FAPESP - 2016 / 11156-0), Coordination for the Improvement of Higher Education Personnel (CAPES), and the National Council for Scientific and Technological Development (CNPq).

## 10. Funding

The authors gratefully acknowledge financial support from the Brazilian fostering agencies Foundation for Research Support (FAPESP - 2016 / 11156-0).

## 11. Abbreviations

DS: Down Syndrome; tDCS: Transcranial direct-current stimulation; EMG: Electromyography; PEDI: Pediatric Evaluation of Disability Inventory; WISC III: Wechsler Intelligence Scale for Children; VR: Virtual Reality

## 12. Open access

This is Open Access article distributed in accordance with the Creative Commons Attribution Non Commercial (CC BY-NC 4.0) license, which permits others to distribute, remix, adapt, build upon this work non-commercially, and license their derivative works on different terms, provided the original work is properly cited and the use is non-commercial. See <http://creativecommons.org/licenses/by-nc/4.0/>

## 13. List of Figures

**Figure 1:** Flowchart of study based on CONSORT statement

**Figure 2:** Placement of markers for three-dimensional analysis using *SMARTup: The experimental setup*  
no peer review only - <http://bmjopen.bmj.com/site/about/guidelines.xhtml>

1 **Figure 3:** Phases of reaching cycle

2  
3 **Figure 4:** Phase relationships. (A) synchronized signals – differences in phases between both  
4 signals are stable (constant); (B) non-synchronized signals – differences in phases are  
5 variable  
6

7  
8 **Figure 5:** Positioning of EEG electrodes based on 10-20 standard  
9  
10  
11  
12  
13  
14  
15  
16  
17  
18  
19  
20  
21  
22  
23  
24  
25  
26  
27  
28  
29  
30  
31  
32  
33  
34  
35  
36  
37  
38  
39  
40  
41  
42  
43  
44  
45  
46  
47  
48  
49  
50  
51  
52  
53  
54  
55  
56  
57  
58  
59  
60

For peer review only

## REFERENCES

1. Moreira LMA, El-Hani CN, Gusmão FAF. **A síndrome de down e sua patogênese: considerações sobre o determinismo genético.** Rev Bras Psiquiatr. 2000; 22(2): 96-9.
2. Lewada AF, Matsonff A, Revenis M, Futtermam C, Nino G, Greenberg J, et al. **Preoperative evaluation and comprehensive risk assessment for children with Down syndrome. Pediatric Anesthesia.** 2016; 26: 356–362.
3. Moreira LMA, Gusmão FAF. **Aspectos genéticos e sociais da sexualidade em pessoas com síndrome de Down.** Rev Bras Psiquiatria. 2002; 24(2): 94-9.
4. Silva MFMC, Kleinahas ACS. **Cognitive processes and brain plasticity in Down Syndrome.** Revis. Bras. Edc. Esp. 2006; 12: 123-138.
5. Luria, AR, Tskvetkova, LS. **The programming of constructive activity in local brain injuries.** Neuropsychological .1964; 95-107
6. Flórez BJ, Troncoso VM. **Síndrome de Down y educación.** 3. reimp. Barcelona: Masson – Salvat Medicina y Santander, 1997.
7. Santos APM, Weiss LI, Almeida GMF. **Assessment and intervention in the motor development of a child with Down syndrome.** Rev Bras Ed Esp Marília. 2010; 16: 19-30
8. Pandilla, M.M. **Pyramidal cell abnormalities in the motor cortex of a child with Down's Syndrome: a golgi study.** Journal of Comparative Neurology. 197:667;63-81.
9. Seaman, J.; Depauw, K.P. **The new adapted physical education.** California, Mayfield, 1982.
10. Block, M.E. **Motor development in children with Down Syndrome: a review of the literature.** Adapted Physical Activity Quaterly. 1991. 8, 79-209.
11. Bomonio LMM, Rosseti CB. **Aspects in perceptual-motor development and sensory-motor intelligence in Down syndrome.** Rev bras crescimento desenvolv hum. 2010; 3: 723-734.
12. Connolly, K.J. **Skill development: Problems and Plans.** In: CONNOLLY, K.J. (ed.) **Mechanisms of motor skill development.** London, Academic Press, 1970
13. Gimenez, R; Stefanoni, F.F & Farias, P.B. **Relação entre a capacidade de sincronização temporal e as habilidades motoras rebater e receber em indivíduos portadores da síndrome de Down.** Revista Brasileira de Ciência e Movimento.
14. Schwartzman, J.S. **Síndrome de Down.** São Paulo, Editora Mackenzie, 1999.

15. Marconi NF, Almeida GL **Principles for learning horizontal-planar arm movements with reversal**. Journal electromyographic and Kinesiology. 2008. 18;771-779
16. Marconi NF, Almeida GL, Gottlieb GL. **Electromyographic and kinetic strategies to control movements**. Brazilian journal of physical therapy. 2006 10;1-8.
17. Latash ML, Corcos DM. **Kinematic and electromyographic characteristics of single-joint movements of individuals with Down syndrome**. Am J Ment Retard. 1991; 96: 189-201.
18. Almeida GL, Corcos DM, Latash ML. **Practice and transfer effects during fast single-joint elbow movements in individuals with Down syndrome**. Phys Ther. 1994; 74: 1000-1016.
19. Almeida GL, Hasan Z, Corcos DM. **Horizontal-plane arm movements with direction reversals performed by normal individuals and individuals with Down syndrome**. J Neurophysiol. 2000; 84: 1949-1960.
20. Aruin AS, Almeida GL, Latash ML. **Organization of a simple two-joint synergy in individuals with Down syndrome**. Am J Ment Retard. 1996; 101: 256-268.
21. Aruin, AS, Almeida GL. **A co-activation strategy in anticipatory postural adjustments in persons with Down syndrome**. Motor Control 1997; 01: 178-191.
22. Latash ML, Anson JG. **What are “normal movements” in atypical populations**. Behav Brain Sci. 1996; 19: 55-68.
23. Marconi NF. **Controle motor de movimentos de reversão em indivíduos neurologicamente normais e portadores da síndrome de Down: O efeito do feedback intrínseco [dissertação]**. Campinas (SP): Universidade Estadual de Campinas; 2000.
24. Ferreira SMS. **Modulação da Latência da Musculatura Antagonista em Indivíduos "neurologicamente normais" e portadores da Síndrome de Down [dissertação]**. Rio Claro (SP): Universidade Estadual Paulista; 2000.
25. Lorenzo SM, Braccialli LMP, Araújo RCT. **Realidade virtual como intervenção na Síndrome de down: uma perspectiva de ação na interface educação e saúde**. Rev Bras Educ Espc. 2015; 21: 392-396.
26. Wuang YP, Chiang CS, Su CY, Wang CC. **Effectiveness of virtual reality using Wii gaming technology in children with Down syndrome**. Res Dev Disabil. 2011; 32: 312–321.
27. Lin HC, WuangYP. **Strength and agility training in adolescents with Down syndrome: A randomized controlled trial**. Res Dev Disabil. 2012; 33: 2236–2244.
28. Mello BCC, Ramalho TF. **Use of virtual reality in the physical therapeutic treatment of individuals with Down syndrome**. Rev Neurocienc. 2015; 23: 143-149.

- 1  
2  
3  
4 29. Moura RFC, Santos C, Grecco LCA, Albertini G, Cimolin V, Galli M, Oliveira C  
5 **Effects of a single session of transcranial direct current stimulation on upper limb**  
6 **movements in children with cerebral palsy: A randomized, sham controlled study.**  
7 *Developmental Neurorehabilitation.* 2017. 19:18.
- 8  
9  
10 30. Lazzari, Roberta Delasta; Politti, Fabiano; Santos, Cibele Almeida; et al. **Effect of a**  
11 **single session of transcranial direct-current stimulation combined with virtual reality**  
12 **training on the balance of children with cerebral palsy: a randomized, controlled,**  
13 **double-blind trial.** *Journal of Physical Therapy Science.* 2015.763-768.
- 14  
15  
16 31. Stagg CJ, Bachtiar V, O'Shea J, Allman C, Bosnell RA, Kischka U, Matthews PM,  
17 Johansen-Berg H. **Cortical activation changes underlying stimulation induced**  
18 **behavioral gains in chronic stroke.** *Brain.* 2012; 135:276-84.
- 19  
20  
21 32. Miranda PC, Lomarev M, Hallett M. **Modeling the current distribution during**  
22 **transcranial direct current stimulation.** *Clin Neurophysiol.* 2006; 117(7):1623-9.
- 23  
24  
25 33. Wagner T, Fregni F, Fecteau S, Grodzinsky A, Zahn M, Pascual-Leone A.  
26 **Transcranial direct current stimulation: A computer-based human model study.**  
27 *Neuroimage* 2007; 35:1113-24.
- 28  
29  
30 34. Liebetanz D, Nitsche MA, Teragau F, Paulus W. **Pharmacological approach to**  
31 **the mechanisms of transcranial DC- stimulation- induced after-effects of humam**  
32 **motor cortex excitability.** *Brain* 2002; 125: 2238-47.
- 33  
34  
35 35. Kuo MF, Unger M, Liebetanz D, Lang N, Tergau F, Paulus W, Nittshe MA.  
36 **Limited impact of homeostatic plasticity on motor learning in humans.**  
37 *Neuropsychologia.* 2008; 46: 2122-8.
- 38  
39  
40 36. Monte-SilvaK, Kuo M-F, Thirugnanasambandam N, Liebetanz D, Paulus W, Nitsche  
41 MA. **Dose- dependente inverted U-shaped effect of dopamine (D2-like) receptor**  
42 **activation on focal and nonfocal plasticity in humans.** *The Journal of Neuroscience.*  
43 2009; 29 (19):6124-31.
- 44  
45  
46 37. Lazzari RD, Politti F, Belina ST, Grecco LAC, Santos CA, Dumont AJL et al.  
47 **Effect of Transcranial Direct Current Stimulation Combined With Virtual Reality**  
48 **Training on Balance in Children With Cerebral Palsy: A Randomized, Controlled,**  
49 **Double-Blind, Clinical Trial.** *Journal of Motor Behavior.* 2016. 1940-1027.
- 50  
51  
52 38. Grecco LA1, Duarte Nde A, de Mendonça ME, Pasini H, Lima VL, Franco RC, de  
53 Oliveira LV, de Carvalho Pde T, Corrêa JC, Collange NZ, Sampaio LM, Galli M, Fregni  
54 F, Oliveira CS. et al. **Effect of transcranial direct current stimulation combined with**  
55 **gait and mobility training on functionality in children with cerebral palsy: study**  
56 **protocol for a double-blind randomized controlled clinical trial.** *BMC*  
57 *Pediatr.* 2013:168.
- 58  
59  
60



- 1  
2  
3  
4 39. Dumont AJL, Araujo M, Lazzari RD, Santos CA, Carvalho DB, Moura RCF. **Effects of a single session of transcranial direct current stimulation on static balance in a patient with hemiparesis: a case study.** *J. Phys. Ther. Sci.* 2015. 27: 955–958.
- 5  
6  
7  
8 40. Nitsche MA, Liebetanz D, Schlitterlau a, Henschke U, Friche K, Frommann K, et al. **GABAergic modulation of DC stimulation-induced motor cortex excitability shifts in humans.** *Eur J Neurosci.* 2004;19(10): 2720-6.
- 9  
10  
11  
12  
13 41. Duarte NDA, Grecco LAC, Galli M, Fregni F, Oliveira C. **Effect of Transcranial Direct-Current Stimulation Combined with Treadmill Training on Balance and Functional Performance in Children with Cerebral Palsy: A Double-Blind Randomized Controlled Trial.** *PLOS ONE.* 2014. 9;8
- 14  
15  
16  
17  
18  
19  
20 42. Grecco LAC, Duarte NDA, Zanon N, Galli M, Fregni F, Oliveira C. **Effect of a single session of transcranial direct-current stimulation on balance and spatiotemporal gait variables in children with cerebral palsy: A randomized sham-controlled study.** *Braz J Phys Ther.* 2014; 18: 419-427.
- 21  
22  
23  
24  
25  
26  
27 43. Mendonça ME, Fregni F. **Neuromodulação com estimulação cerebral não invasiva: aplicação no acidente vascular encefálico, doença de Parkinson e dor crônica.** In.: ASSIS, R.D. *Condutas práticas em fisioterapia neurológica.* Manole. São Paulo, p. 307-39, 2012.
- 28  
29  
30  
31  
32  
33 44. Fregni F, Gimenes R, Valle AC, Ferreira MJ, Rocha RR, Natalle L, Bravo R, Rigonatti SP, Freedman S, Nitsche M, Pascual-Leone A, Boggio PS. **A randomized, sham-controlled, proof of principle study of transcranial direct current stimulation for the treatment of pain in fibromyalgia.** *Arthritis and Rheumatism,* 2006; 54:3988-98.
- 34  
35  
36  
37  
38  
39  
40 45. Fregni F, Bossio PS, Brunoni AR. **Neuromodulação terapêutica: Princípios e avanços da estimulação cerebral não invasiva em neurologia, reabilitação, psiquiatria e neuropsicologia.** Sarvier. São Paulo, 2012.
- 41  
42  
43  
44  
45  
46  
47 46. Fritsch B, Reis J, Martinowich K, Schambra HM, Ji Y, Cohen LG, et al. **Direct current stimulation promotes BDNF-dependent synaptic plasticity: potential implications for motor learning.** *Neuron.* 2010;66(2): 198-204.
- 48  
49  
50  
51  
52  
53  
54 47. Reis J, Robertson EM, Krakauer JW, Rothwell J, Marshall L, Gerloff C, et al. **Consensus: Can transcranial direct current stimulation and transcranial magnetic stimulation enhance motor learning and memory formation.** *Brain stimulation.* 2008;1(4): 363-9.
- 55  
56  
57  
58  
59  
60 48. Antal A, Lang N, Boros K, Nitsche M, Siebner HR, Paulus W. **Homeostatic metaplasticity of the motor cortex is altered during headache-free intervals in migraine with aura.** *Cerebral cortex.* 2008;18(11):2701-5.

- 1  
2  
3  
4  
5  
6  
7  
8  
9  
10  
11  
12  
13  
14  
15  
16  
17  
18  
19  
20  
21  
22  
23  
24  
25  
26  
27  
28  
29  
30  
31  
32  
33  
34  
35  
36  
37  
38  
39  
40  
41  
42  
43  
44  
45  
46  
47  
48  
49  
50  
51  
52  
53  
54  
55  
56  
57  
58  
59  
60
49. Cimolin V, Beretta E, Piccinini L, Turconi AC, Galli M, Strazzer S. **Constraint-induced movement therapy for children with hemiplegia after traumatic brain injury: a quantitative study.** *J Head Trauma Rehabil.* 2012; 27(3): 177-87.
50. Menegoni F, Milano E, Trotti C, Galli M, Bigoni M, Baudo S, Mauro A. **Quantitative evaluation of functional limitation of upper limb movements in subjects affected by ataxia.** *Eur J Neurol.* 2009; 16(2): 232-9.
51. Petuskey K, Bagley A, Abdala E, James MA, Rab G. **Upper extremity kinematics during functional activities: three-dimensional studies in a normal pediatric population.** *Gait Posture.* 2007; 25(4): 573-9.
52. Hermes JH, Freriks B, Merletti R, Stegeman D, Blok J, Rau G, Disselhorst-Klug C, Hagg G: **SENIAM 8: Surface Electromyography for the Non-Invasive Assessment of Muscles.** Roessingh Research and Development 1999.
53. Rab G, Petuskey K, Bagley A. **A method for determination of upper extremity kinematics.** *Gait Posture.* 2002; 15(2): 113-9.
54. Jasper HH. **The ten-twenty electrode system of the International Federation electroencephalografia.** *Clin Neurophysiol.* 1958; 10: 371-375.
55. Homan RW, Herman J, Purdy P. **Cerebral location of international 10-20 system electrode placement.** *Electroencephalogr Clin Neurophysiol.* 1987; 66(4): 376-82.
56. FELL, J.; AXMACHER, N. **The role of phase synchronization in memory processes.** *Nature Reviews Neuroscience*, v. 12, n. 2, p. 105–118, fev. 2011
57. Haley S, Coster W, Ludlow L. **Inventário de avaliação pediátrica de disfunção: versão brasileira. Tradução e adaptação cultural:** Mancini M C. Belo Horizonte: Laboratórios de Atividade e Desenvolvimento Infantil, Departamento de Terapia Ocupacional, Universidade Federal de Minas Gerais. 2000.
58. Feldman AB, Haley SM, Corvell J. **Concurrent and construct validity of the Pediatric Evaluation of Disability Inventory.** *Phys. Ther.* 1990; 70(10): 602-10.
59. Cruz MBZ, WISC III: **Escala de Inteligência Wechsler para crianças: Manual. Periodicos eletrônicos em psicologia.** 2005; 4: 309.
60. Grecco LA, de Almeida Carvalho Duarte N, Mendonça ME, Cimolin V, Galli M, Fregni F, Santos Oliveira C. **Transcranial direct current stimulation during treadmill training in children with cerebral palsy: a randomized controlled double-blind clinical trial.** *Research in Developmental Disabilities* 2014;3 (11):2840–2848.
61. Gillick T, Feyma T, Menk J, Usset M, Vaith A, Wood J, Worthing R et al., **Safety and feasibility of transcranial direct current stimulation in pediatric hemiparesis: randomized controlled preliminary study.** *Physical Therapy* 2015;95(3):337–349.

- 1  
2  
3  
4 62. Grecco et al. **Cerebellar transcranial direct current stimulation in children with ataxic cerebral palsy: a sham-controlled, crossover,pilot study.** *Developmental Neurorehabilitation* 2016;22:1–7
- 5  
6  
7  
8  
9 63. Naseri P, Nitsche MA e Ekhtiar H. **A framework for categorizing electrode montages in transcranial direct current stimulation.** *Front Hum Neurosci.* 2015, 6;9:54.
- 10  
11  
12 64. Boggio P. S., Ferruci R., Mameli F., Martins D., Martins O., Vergari M., et al. .  
13 (2012). **Prolonged visual memory enhancement after direct current stimulation in  
14 Alzheimer's disease.** *Brain Stimul.* 5, 223–230. 10.1016/j.brs.2011.06.006 [PubMed]  
15 [Cross Ref]
- 16  
17  
18 65. Lapenta O. M., Fregni F., Oberman L. M., Boggio P. S. (2012). **Bilateral temporal  
19 cortex transcranial direct current stimulation worsens male performance in a  
20 multisensory integration task.** *Neurosci. Lett.* 527, 105–109.  
21 10.1016/j.neulet.2012.08.076 [PubMed] [Cross Ref]
- 22  
23  
24 66. Chamovitz YS e Weiss PL **Virtual reality as a leisure activity for young adults  
25 with physical and intellectual disabilities** *Science Direct.* 2008;29:273- 287
- 26  
27  
28 67. Wuang PY, Chiang SC, Su YC et al., **Effectiveness of virtual reality using Wii  
29 gaming technology in children with Down syndrome** *Science Direct.* 2011; 32: 312-321
- 30  
31  
32 68. Lin HC e Wuang PY **Strength and agility training in adolescents with Down  
33 syndrome: A randomized controlled trial.** *Science Direct* 2012;33:2236-2244.  
34  
35  
36  
37  
38  
39  
40  
41  
42  
43  
44  
45  
46  
47  
48  
49  
50  
51  
52  
53  
54  
55  
56  
57  
58  
59  
60

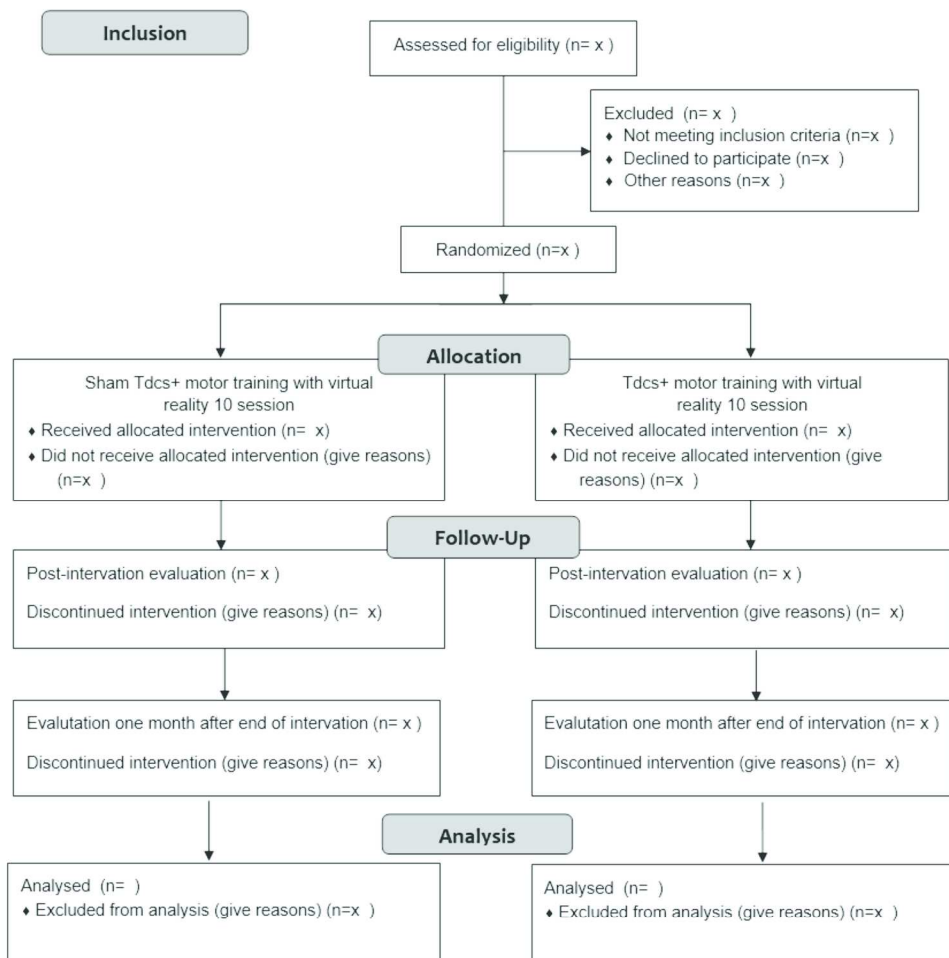

Figure 1: Flowchart of study following CONSORT statement

205x213mm (300 x 300 DPI)

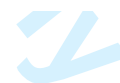

1  
2  
3  
4  
5  
6  
7  
8  
9  
10  
11  
12  
13  
14  
15  
16  
17  
18  
19  
20  
21  
22  
23  
24  
25  
26  
27  
28  
29  
30  
31  
32  
33  
34  
35  
36  
37  
38  
39  
40  
41  
42  
43  
44  
45  
46  
47  
48  
49  
50  
51  
52  
53  
54  
55  
56  
57  
58  
59  
60

1  
2  
3  
4  
5  
6  
7  
8  
9  
10  
11  
12  
13  
14  
15  
16  
17  
18  
19  
20  
21  
22  
23  
24  
25  
26  
27  
28  
29  
30  
31  
32  
33  
34  
35  
36  
37  
38  
39  
40  
41  
42  
43  
44  
45  
46  
47  
48  
49  
50  
51  
52  
53  
54  
55  
56  
57  
58  
59  
60

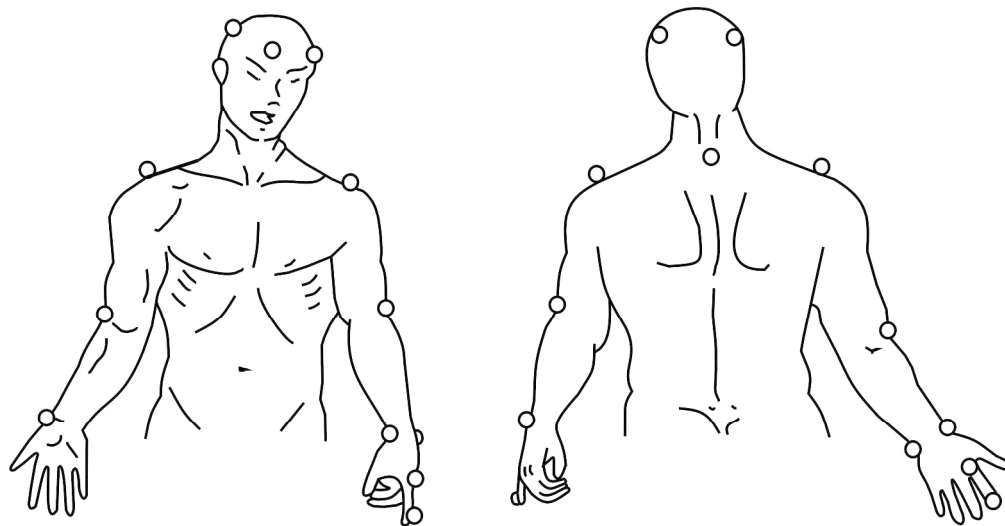

Figure 2: Placement of markers for three-dimensional analysis using SMARTup: The experimental setup

287x149mm (300 x 300 DPI)

review only

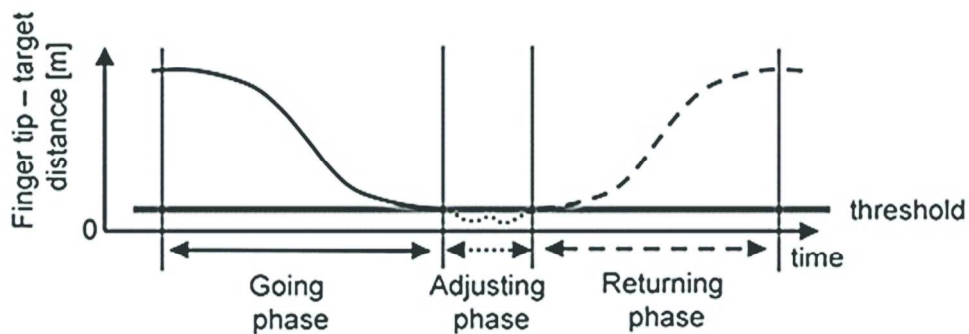

Figure 3: Phases of reaching cycle

294x137mm (300 x 300 DPI)

er review only

1  
2  
3  
4  
5  
6  
7  
8  
9  
10  
11  
12  
13  
14  
15  
16  
17  
18  
19  
20  
21  
22  
23  
24  
25  
26  
27  
28  
29  
30  
31  
32  
33  
34  
35  
36  
37  
38  
39  
40  
41  
42  
43  
44  
45  
46  
47  
48  
49  
50  
51  
52  
53  
54  
55  
56  
57  
58  
59  
60

1  
2  
3  
4  
5  
6  
7  
8  
9  
10  
11  
12  
13  
14  
15  
16  
17  
18  
19  
20  
21  
22  
23  
24  
25  
26  
27  
28  
29  
30  
31  
32  
33  
34  
35  
36  
37  
38  
39  
40  
41  
42  
43  
44  
45  
46  
47  
48  
49  
50  
51  
52  
53  
54  
55  
56  
57  
58  
59  
60



Figure 4 – Phase relationships. (A) synchronized signals – differences in phases between both signals are stable (constant); (B) non-synchronized signals – differences in phases are variable

280x95mm (300 x 300 DPI)

Peer review only

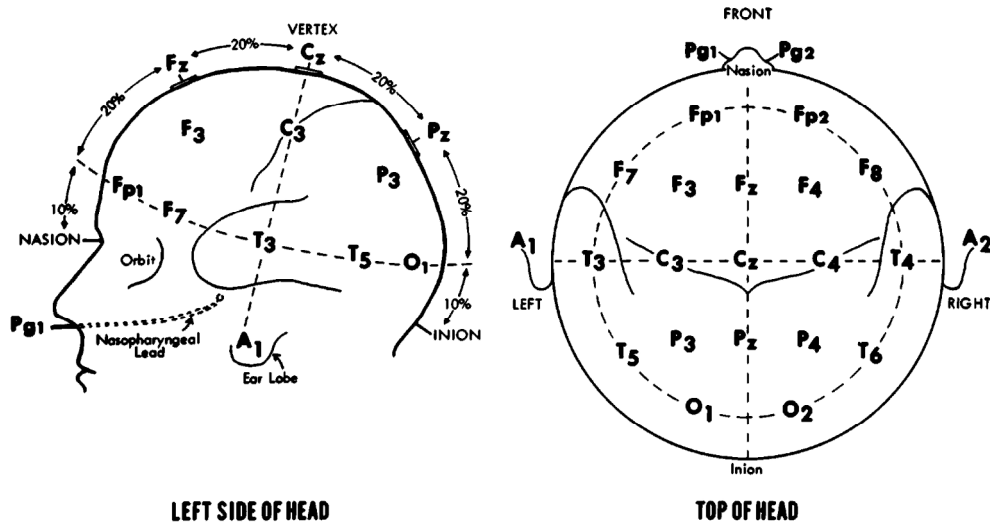

Figure 5 – Positioning of EEG electrodes following 10-20 standard

355x188mm (300 x 300 DPI)

review only

1  
2  
3  
4  
5  
6  
7  
8  
9  
10  
11  
12  
13  
14  
15  
16  
17  
18  
19  
20  
21  
22  
23  
24  
25  
26  
27  
28  
29  
30  
31  
32  
33  
34  
35  
36  
37  
38  
39  
40  
41  
42  
43  
44  
45  
46  
47  
48  
49  
50  
51  
52  
53  
54  
55  
56  
57  
58  
59  
60



**APPENDIX 1**

## Termo de Consentimento para Participação em Pesquisa Clínica

Nome do Voluntário: \_\_\_\_\_

Endereço: \_\_\_\_\_

Telefone para contato: \_\_\_\_\_ Cidade: \_\_\_\_\_ CEP: \_\_\_\_\_

E mail: \_\_\_\_\_

1. As informações contidas neste prontuário foram fornecidas pela aluna Jamile Benite Palma Lopes (Mestranda da Universidade Nove de Julho), Prof<sup>a</sup>. Claudia Santos Oliveira, objetivando firmar acordo escrito mediante o qual, o voluntário da pesquisa autoriza sua participação com pleno conhecimento da natureza dos procedimentos e riscos a que se submeterá, com a capacidade de livre arbítrio e sem qualquer coação.

2. Título do Trabalho Experimental: Realidade virtual e estimulação transcraniana por corrente contínua anódica para melhora da função motora de membros superiores em crianças com síndrome de down: ensaio clínico controlado aleatorizado e duplo cego.

3. Objetivo: Examinar os efeitos da estimulação por corrente sobre o controle motor, atividade dos músculos, atividade do cérebro e independência funcional de crianças com Síndrome de Down.

4. Justificativa: acredita-se que ao aplicar a estimulação por corrente, especificamente, durante o treino motor com uso de um vídeo game, será possível, otimizar a atividade do cérebro e a melhora motora.

5. Procedimentos da Fase Experimental: Será selecionadas crianças diagnosticadas com Síndrome de Down, com capacidade de entendimento e colaboração para realização dos procedimentos envolvidos no estudo, crianças com idade entre seis e 12 anos, crianças com queixas de comprometimento Na coordenação motora dos braços. O processo de avaliação (antes, após e um mês após o treino, será realizado em três dias não consecutivos, mas na mesma semana, com período máximo de uma hora e 30 minutos por dia. A avaliação será constituída dos seguintes itens: (1) Análise de movimento dos braços durante uma tarefa: avaliado pela cinemática, eletromiografia e eletroencefalograma, a criança realizara uma tarefa com os braços e ao mesmo tempo será avaliada pelos aparelhos, sendo acompanhada pelo fisioterapeuta responsável e pelos assistentes (2) PEDI o PEDI é um questionário aplicado no formato de entrevista estruturada com um dos cuidadores da criança, que possa informar sobre seu desempenho em atividades e tarefas típicas da rotina diária. O teste é composto de três partes: a primeira avalia habilidades de repertório de crianças agrupadas segundo as seguintes guidelines.xhtml

1  
2  
3 funcionais: autocuidado (73 itens), mobilidade (59 itens) e função social (65 itens). Cada  
4 item dessa parte é pontuado com escore 0 (zero) se a criança não é capaz de desempenhar  
5 a atividade, ou 1 (um), se a atividade fizer parte de seu repertório de habilidades. O Grupo  
6  
7  
8  
9  
10  
11  
12  
13  
14  
15  
16  
17  
18  
19  
20

funcionais: autocuidado (73 itens), mobilidade (59 itens) e função social (65 itens). Cada item dessa parte é pontuado com escore 0 (zero) se a criança não é capaz de desempenhar a atividade, ou 1 (um), se a atividade fizer parte de seu repertório de habilidades. O Grupo 1 terá o movimento do braço analisado após realizar treino com o vídeo game junto com a estimulação desligada (placebo). O Grupo 2 terá o movimento do braço analisado após realizar treino com o vídeo game junto com a estimulação ligada. A estimulação por corrente é uma técnica não invasiva que será realizada colocando eletrodos de superfície conectados a um aparelho de corrente galvânica (corrente elétrica de baixa intensidade) sobre o crânio (cabeça) da criança, durante 20 minutos por 15 dias. A estimulação é indolor.

21  
22  
23  
24  
25  
26  
27  
28  
29  
30  
31  
32  
33  
34

6. Desconforto ou Risco Esperado: Embora os procedimentos adotados no estudo sejam não-invasivos os voluntários serão submetidos a risco como por exemplo, quedas, fadiga muscular, câimbras durante o treino motor de realidade virtual. Para que estes riscos sejam minimizados ao máximo serão adotadas as seguintes medidas protetoras: A estimulação será realizada por uma fisioterapeuta com experiência na técnica. No treino de realidade virtual serão realizados por uma fisioterapeuta com experiência em treino motor que será acompanhada por ao menos um voluntário ambos permanecerão posicionados do lado do paciente por todo o treino.

35  
36  
37  
38  
39  
40  
41  
42  
43  
44  
45

7. Informações: o voluntário tem garantia que receberá respostas a qualquer pergunta ou esclarecimento de qualquer dúvida quanto aos procedimentos, riscos benefícios e outros assuntos relacionados com pesquisa. Também os pesquisadores supracitados assumem o compromisso de proporcionar informação atualizada obtida durante o estudo, ainda que esta possa afetar a vontade do indivíduo em continuar participando.

46  
47  
48  
49  
50

8. Retirada do Consentimento: o voluntário tem a liberdade de retirar seu consentimento a qualquer momento e deixar de participar do estudo, sem que isto lhe traga qualquer prejuízo.

51  
52  
53  
54  
55

9. Aspecto Legal: Elaborados de acordo com as diretrizes e normas regulamentadas de pesquisa envolvendo seres humanos atendendo à Resolução nº. 466/12 do Conselho Nacional de Saúde do Ministério de Saúde – Brasília – DF.

56  
57  
58  
59

10. Garantia de Sigilo: Os pesquisadores asseguram a privacidade dos voluntários quanto aos dados confidenciais envolvidos na pesquisa.

60

11. Formas de ressarcimento das despesas decorrentes da participação na pesquisa: Se necessário, será dado aos pesquisados auxílio transporte de ida e volta ao local da pesquisa. Não será dada ao pesquisado qualquer tipo de remuneração e auxílio de custo pela participação na pesquisa. Pelo curto tempo das avaliações e intervenções não haverá fornecimento de alimentação ao pesquisado.

For peer review only - <http://bmjopen.bmj.com/site/about/guidelines.xhtml>

1  
2  
3 12. Local da Pesquisa: A pesquisa será desenvolvida no Laboratório Integrado de  
4 Análise do Movimento Humano - LIAMH e Núcleo de Apoio a Pesquisa na Análise do  
5 Movimento - NAPAM, Universidade Nove de Julho UNINOVE, localizada na rua  
6 Vergueiro, no 235/249, 2º subsolo, Vergueiro, São Paulo - SP.  
7  
8

9  
10 13. Comitê de Ética em Pesquisa (CEP) é um colegiado interdisciplinar e  
11 independente, que deve existir nas instituições que realizam pesquisas envolvendo seres  
12 humanos no Brasil, criado para defender os interesses dos participantes de pesquisas em sua  
13 integridade e dignidade e para contribuir no desenvolvimento das pesquisas dentro dos  
14 padrões éticos (Normas e Diretrizes Regulamentadoras da Pesquisa envolvendo Seres  
15 Humanos – Res. CNS nº 466/12). O Comitê de Ética é responsável pela avaliação e  
16 acompanhamento dos protocolos de pesquisa no que corresponde aos aspectos éticos.  
17  
18  
19  
20  
21  
22  
23

24 **Endereço do Comitê de Ética da Uninove: Rua. Vergueiro nº 235/249 – 3º subsolo**  
25  
26 **- Liberdade – São Paulo – SP CEP. 01504-001 Fone: 3385-9197 .**  
27  
28 **comitedeetica@uninove.br**

29  
30 14. Nome Completo e telefones dos pesquisadores para contato: Orientadora:  
31 Claudia Santos Oliveira (11 3665 9344) e aluno de pós graduação: Jamile Benite Palma  
32 Lopes (11) 975123549.  
33  
34

35 15. Eventuais intercorrências que vierem a surgir no decorrer da pesquisa poderão  
36 ser discutidas pelos meios próprios.  
37

38 16. Consentimento Pós-Informação:

39  
40 Eu, \_\_\_\_\_, após leitura e  
41 compreensão deste termo de informação e consentimento, entendo que minha participação  
42 é voluntária, e que posso sair a qualquer momento do estudo, sem prejuízo algum. Confirmo  
43 que recebi cópia deste termo de consentimento, e autorizo a execução do trabalho de  
44 pesquisa e a divulgação dos dados obtidos neste estudo no meio científico.  
45  
46  
47  
48  
49

50 \* Não assine este termo se ainda tiver alguma dúvida a

51 respeito. São Paulo, de de 2016.

52 Nome (por extenso) do pesquisado:

53 \_\_\_\_\_  
54 Assinatura pesquisado:

55 \_\_\_\_\_  
56 Nome (por extenso) do pesquisado:

57 \_\_\_\_\_  
58 Assinatura pesquisado:  
59  
60

1  
2  
3  
4  
5  
6  
7  
8  
9  
10  
11  
12  
13  
14  
15  
16  
17  
18  
19  
20  
21  
22  
23  
24  
25  
26  
27  
28  
29  
30  
31  
32  
33  
34  
35  
36  
37  
38  
39  
40  
41  
42  
43  
44  
45  
46  
47  
48  
49  
50  
51  
52  
53  
54  
55  
56  
57  
58  
59  
60

For peer review only

## APPENDIX 2

## Approval of the Ethics Committee

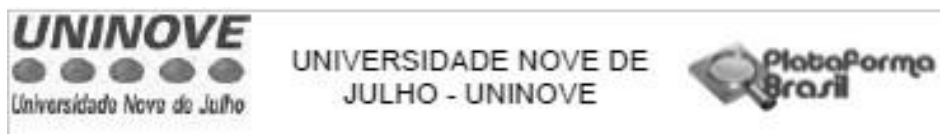

## PARECER CONSUBSTANCIADO DO CEP

## DADOS DO PROJETO DE PESQUISA

**Título da Pesquisa:** REALIDADE VIRTUAL E ESTIMULAÇÃO TRANSCRANIANA POR CORRENTE CONTÍNUA PARA MELHORA DA FUNÇÃO MOTORA DE MEMBROS SUPERIORES EM CRIANÇAS COM SÍNDROME DE DOWN: ENSAIO CLÍNICO CONTROLADO ALEATORIZADO E DUPLO CEGO

**Pesquisador:** Jamile Benite Palma Lopes

**Área Temática:**

**Versão:** 1

**CAAE:** 55196516.0.0000.5511

**Instituição Proponente:** ASSOCIAÇÃO EDUCACIONAL NOVE DE JULHO

**Patrocinador Principal:** Financiamento Próprio

## DADOS DO PARECER

**Número do Parecer:** 1.517.470

**Apresentação do Projeto:**

O projeto chama a atenção para as dificuldades motoras apresentadas por crianças com síndrome de down, e sugere uma intervenção que possibilite uma melhora no controle motor dessa população.

**Objetivo da Pesquisa:**

Verificar os efeitos da estimulação transcraniana por corrente contínua (tDCS) associado a um treino neuromotor em membro superior com realidade virtual sobre a atividade cerebral e controle motor em crianças com Síndrome de Down (SD).

 **Avaliação dos Riscos e Benefícios:**

Embora os procedimentos adotados no estudo sejam não-invasivos os voluntários serão submetidos a risco como por exemplo, quedas, fadiga muscular, câimbras durante o treino motor de realidade virtual. Para que estes riscos sejam minimizados ao máximo serão adotadas as seguintes medidas protetoras: A estimulação transcraniana será realizada por uma fisioterapeuta com experiência na técnica. No treino de realidade virtual serão realizados por uma fisioterapeuta com experiência em treino motor que será acompanhada por ao menos um voluntário ambos

**Endereço:** VERGUEIRO nº 235/249  
**Bairro:** LIBERDADE **CEP:** 01.504-001  
**UF:** SP **Município:** SAO PAULO  
**Telefone:** (11)3385-0197 **E-mail:** comitedetica@uninove.br

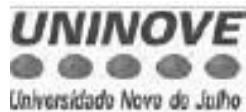

UNIVERSIDADE NOVE DE  
JULHO - UNINOVE

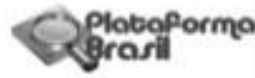

Continuação do Parecer: 1.517.470

permanecerão posicionados do lado do paciente por todo o treino.

**Comentários e Considerações sobre a Pesquisa:**

O projeto apresenta as características éticas necessárias para realização da pesquisa.

**Considerações sobre os Termos de apresentação obrigatória:**

Foram apresentados os termos exigidos para aprovação da pesquisa.

Considerando que tratam-se de crianças com Síndrome de Down, não é necessário o TCLE específico para menores.

**Recomendações:**

O TCLE, embora apresente os aspectos exigidos, ele deve ser reescrito, uma vez que se encontra com uma linguagem estritamente técnica sobre os procedimentos que serão realizados na pesquisas, assim como constitui-se num documento muito longo (com 6 páginas).

**Conclusões ou Pendências e Lista de Inadequações:**

Recomenda-se reescrever o TCLE, adequando a linguagem (mais simples e acessível ao responsável pela criança participante)

Resumir as informações tomando o TCLE mais simplificado e objetivo.

Este parecer foi elaborado baseado nos documentos abaixo relacionados:

| Tipo Documento                                            | Arquivo                                      | Postagem               | Autor                     | Situação |
|-----------------------------------------------------------|----------------------------------------------|------------------------|---------------------------|----------|
| Informações Básicas do Projeto                            | PE_INFORMAÇÕES_BASICAS_DO_PROJETO_693482.pdf | 12/04/2016<br>15:41:42 |                           | Aceito   |
| Folha de Rosto                                            | DOC120416.pdf                                | 12/04/2016<br>15:40:49 | Jamile Benite Palma Lopes | Aceito   |
| Projeto Detalhado / Brochura Investigador                 | projetofinal.pdf                             | 06/04/2016<br>16:57:04 | Jamile Benite Palma Lopes | Aceito   |
| TCLE / Termos de Assentimento / Justificativa de Ausência | Termo.pdf                                    | 06/04/2016<br>16:46:17 | Jamile Benite Palma Lopes | Aceito   |
| Cronograma                                                | cronograma.pdf                               | 06/04/2016<br>16:45:48 | Jamile Benite Palma Lopes | Aceito   |

**Situação do Parecer:**

Pendente

**Necessita Apreciação da CONEP:**

Endereço: VERGUEIRO nº 235/240  
Bairro: LIBERDADE CEP: 01.504-001  
UF: SP Município: SAO PAULO  
Telefone: (11)3385-0107 E-mail: comitedeetica@uninove.br

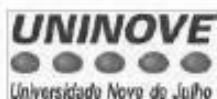

UNIVERSIDADE NOVE DE  
JULHO - UNINOVE

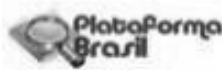

Continuação do Parecer: 1.517.470

Não

SAO PAULO, 27 de Abril de 2016

Assinado por:  
Stella Regina Zamuner  
(Coordenador)

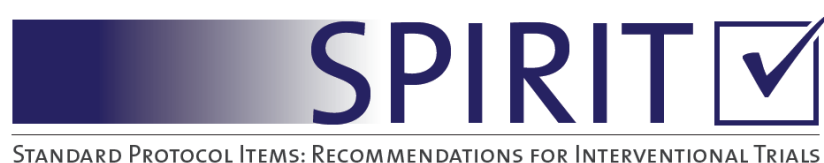

STANDARD PROTOCOL ITEMS: RECOMMENDATIONS FOR INTERVENTIONAL TRIALS

SPIRIT 2013 Checklist: Recommended items to address in a clinical trial protocol and related documents\*

| Section/item                      | Item No | Description                                                                                                                                                                                                                                                                              | Addressed on page number |
|-----------------------------------|---------|------------------------------------------------------------------------------------------------------------------------------------------------------------------------------------------------------------------------------------------------------------------------------------------|--------------------------|
| <b>Administrative information</b> |         |                                                                                                                                                                                                                                                                                          |                          |
| Title                             | 1       | Descriptive title identifying the study design, population, interventions, and, if applicable, trial acronym                                                                                                                                                                             | <u>01</u>                |
| Trial registration                | 2a      | Trial identifier and registry name. If not yet registered, name of intended registry                                                                                                                                                                                                     | <u>03-08-14</u>          |
|                                   | 2b      | All items from the World Health Organization Trial Registration Data Set                                                                                                                                                                                                                 | <u>14</u>                |
| Protocol version                  | 3       | Date and version identifier                                                                                                                                                                                                                                                              | <u>NA</u>                |
| Funding                           | 4       | Sources and types of financial, material, and other support                                                                                                                                                                                                                              | <u>15</u>                |
| Roles and responsibilities        | 5a      | Names, affiliations, and roles of protocol contributors                                                                                                                                                                                                                                  | <u>01-02-03</u>          |
|                                   | 5b      | Name and contact information for the trial sponsor                                                                                                                                                                                                                                       | <u>01-02-14</u>          |
|                                   | 5c      | Role of study sponsor and funders, if any, in study design; collection, management, analysis, and interpretation of data; writing of the report; and the decision to submit the report for publication, including whether they will have ultimate authority over any of these activities | <u>08-14</u>             |
|                                   | 5d      | Composition, roles, and responsibilities of the coordinating centre, steering committee, endpoint adjudication committee, data management team, and other individuals or groups overseeing the trial, if applicable (see Item 21a for data monitoring committee)                         | <u>14</u>                |

1 **Introduction**

|    |                                                           |     |                                                                                                               |
|----|-----------------------------------------------------------|-----|---------------------------------------------------------------------------------------------------------------|
| 2  |                                                           |     | 05-06                                                                                                         |
| 3  | Background and                                            | 6a  | Description of research question and justification for undertaking the trial, including summary of relevant   |
| 4  | rationale                                                 |     | studies (published and unpublished) examining benefits and harms for each intervention                        |
| 5  |                                                           |     | _____                                                                                                         |
| 6  |                                                           | 6b  | Explanation for choice of comparators                                                                         |
| 7  |                                                           |     | 05-06                                                                                                         |
| 8  | Objectives                                                | 7   | Specific objectives or hypotheses                                                                             |
| 9  |                                                           |     | _____                                                                                                         |
| 10 | Trial design                                              | 8   | Description of trial design including type of trial (eg, parallel group, crossover, factorial, single group), |
| 11 |                                                           |     | allocation ratio, and framework (eg, superiority, equivalence, noninferiority, exploratory)                   |
| 12 |                                                           |     | 07-08                                                                                                         |
| 13 |                                                           |     | _____                                                                                                         |
| 14 | <b>Methods: Participants, interventions, and outcomes</b> |     |                                                                                                               |
| 15 | Study setting                                             | 9   | Description of study settings (eg, community clinic, academic hospital) and list of countries where data will |
| 16 |                                                           |     | be collected. Reference to where list of study sites can be obtained                                          |
| 17 |                                                           |     | 08                                                                                                            |
| 18 |                                                           |     | _____                                                                                                         |
| 19 | Eligibility criteria                                      | 10  | Inclusion and exclusion criteria for participants. If applicable, eligibility criteria for study centres and  |
| 20 |                                                           |     | individuals who will perform the interventions (eg, surgeons, psychotherapists)                               |
| 21 |                                                           |     | 07                                                                                                            |
| 22 |                                                           |     | _____                                                                                                         |
| 23 | Interventions                                             | 11a | Interventions for each group with sufficient detail to allow replication, including how and when they will be |
| 24 |                                                           |     | administered                                                                                                  |
| 25 |                                                           |     | 12-13-14                                                                                                      |
| 26 |                                                           |     | _____                                                                                                         |
| 27 |                                                           | 11b | Criteria for discontinuing or modifying allocated interventions for a given trial participant (eg, drug dose  |
| 28 |                                                           |     | change in response to harms, participant request, or improving/worsening disease)                             |
| 29 |                                                           |     | NA                                                                                                            |
| 30 |                                                           |     | _____                                                                                                         |
| 31 | n                                                         | 11c | Strategies to improve adherence to intervention protocols, and any procedures for monitoring adherence        |
| 32 |                                                           |     | (eg, drug tablet return, laboratory tests)                                                                    |
| 33 |                                                           |     | NA                                                                                                            |
| 34 |                                                           |     | _____                                                                                                         |
| 35 |                                                           | 11d | Relevant concomitant care and interventions that are permitted or prohibited during the trial                 |
| 36 | Outcomes                                                  | 12  | Primary, secondary, and other outcomes, including the specific measurement variable (eg, systolic blood       |
| 37 |                                                           |     | pressure), analysis metric (eg, change from baseline, final value, time to event), method of aggregation (eg, |
| 38 |                                                           |     | median, proportion), and time point for each outcome. Explanation of the clinical relevance of chosen         |
| 39 |                                                           |     | efficacy and harm outcomes is strongly recommended                                                            |
| 40 |                                                           |     | 12-13                                                                                                         |
| 41 |                                                           |     | _____                                                                                                         |
| 42 | Participant timeline                                      | 13  | Time schedule of enrolment, interventions (including any run-ins and washouts), assessments, and visits for   |
| 43 |                                                           |     | participants. A schematic diagram is highly recommended (see Figure)                                          |
| 44 |                                                           |     | 08-09 -10                                                                                                     |
| 45 |                                                           |     | _____                                                                                                         |



|    |                                                                     |     |                                                                                                                                                                                                                                                                                                                                                                                                              |              |
|----|---------------------------------------------------------------------|-----|--------------------------------------------------------------------------------------------------------------------------------------------------------------------------------------------------------------------------------------------------------------------------------------------------------------------------------------------------------------------------------------------------------------|--------------|
| 1  | Sample size                                                         | 14  | Estimated number of participants needed to achieve study objectives and how it was determined, including clinical and statistical assumptions supporting any sample size calculations                                                                                                                                                                                                                        | <u>08</u>    |
| 2  |                                                                     |     |                                                                                                                                                                                                                                                                                                                                                                                                              |              |
| 3  |                                                                     |     |                                                                                                                                                                                                                                                                                                                                                                                                              |              |
| 4  | Recruitment                                                         | 15  | Strategies for achieving adequate participant enrolment to reach target sample size                                                                                                                                                                                                                                                                                                                          | <u>08</u>    |
| 5  |                                                                     |     |                                                                                                                                                                                                                                                                                                                                                                                                              |              |
| 6  |                                                                     |     |                                                                                                                                                                                                                                                                                                                                                                                                              |              |
| 7  | <b>Methods: Assignment of interventions (for controlled trials)</b> |     |                                                                                                                                                                                                                                                                                                                                                                                                              |              |
| 8  |                                                                     |     |                                                                                                                                                                                                                                                                                                                                                                                                              |              |
| 9  | Allocation:                                                         |     |                                                                                                                                                                                                                                                                                                                                                                                                              |              |
| 10 |                                                                     |     |                                                                                                                                                                                                                                                                                                                                                                                                              |              |
| 11 | Sequence generation                                                 | 16a | Method of generating the allocation sequence (eg, computer-generated random numbers), and list of any factors for stratification. To reduce predictability of a random sequence, details of any planned restriction (eg, blocking) should be provided in a separate document that is unavailable to those who enrol participants or assign interventions                                                     | <u>08</u>    |
| 12 |                                                                     |     |                                                                                                                                                                                                                                                                                                                                                                                                              |              |
| 13 |                                                                     |     |                                                                                                                                                                                                                                                                                                                                                                                                              |              |
| 14 |                                                                     |     |                                                                                                                                                                                                                                                                                                                                                                                                              |              |
| 15 |                                                                     |     |                                                                                                                                                                                                                                                                                                                                                                                                              |              |
| 16 |                                                                     |     |                                                                                                                                                                                                                                                                                                                                                                                                              |              |
| 17 | Allocation concealment mechanism                                    | 16b | Mechanism of implementing the allocation sequence (eg, central telephone; sequentially numbered, opaque, sealed envelopes), describing any steps to conceal the sequence until interventions are assigned                                                                                                                                                                                                    | <u>08</u>    |
| 18 |                                                                     |     |                                                                                                                                                                                                                                                                                                                                                                                                              |              |
| 19 |                                                                     |     |                                                                                                                                                                                                                                                                                                                                                                                                              |              |
| 20 |                                                                     |     |                                                                                                                                                                                                                                                                                                                                                                                                              |              |
| 21 | Implementation                                                      | 16c | Who will generate the allocation sequence, who will enrol participants, and who will assign participants to interventions                                                                                                                                                                                                                                                                                    | <u>08</u>    |
| 22 |                                                                     |     |                                                                                                                                                                                                                                                                                                                                                                                                              |              |
| 23 |                                                                     |     |                                                                                                                                                                                                                                                                                                                                                                                                              |              |
| 24 | Blinding (masking)                                                  | 17a | Who will be blinded after assignment to interventions (eg, trial participants, care providers, outcome assessors, data analysts), and how                                                                                                                                                                                                                                                                    | <u>08</u>    |
| 25 |                                                                     |     |                                                                                                                                                                                                                                                                                                                                                                                                              |              |
| 26 |                                                                     |     |                                                                                                                                                                                                                                                                                                                                                                                                              |              |
| 27 |                                                                     |     |                                                                                                                                                                                                                                                                                                                                                                                                              |              |
| 28 |                                                                     | 17b | If blinded, circumstances under which unblinding is permissible, and procedure for revealing a participant's allocated intervention during the trial                                                                                                                                                                                                                                                         | <u>08</u>    |
| 29 |                                                                     |     |                                                                                                                                                                                                                                                                                                                                                                                                              |              |
| 30 |                                                                     |     |                                                                                                                                                                                                                                                                                                                                                                                                              |              |
| 31 |                                                                     |     |                                                                                                                                                                                                                                                                                                                                                                                                              |              |
| 32 | <b>Methods: Data collection, management, and analysis</b>           |     |                                                                                                                                                                                                                                                                                                                                                                                                              |              |
| 33 |                                                                     |     |                                                                                                                                                                                                                                                                                                                                                                                                              |              |
| 34 | Data collection methods                                             | 18a | Plans for assessment and collection of outcome, baseline, and other trial data, including any related processes to promote data quality (eg, duplicate measurements, training of assessors) and a description of study instruments (eg, questionnaires, laboratory tests) along with their reliability and validity, if known. Reference to where data collection forms can be found, if not in the protocol | <u>08-14</u> |
| 35 |                                                                     |     |                                                                                                                                                                                                                                                                                                                                                                                                              |              |
| 36 |                                                                     |     |                                                                                                                                                                                                                                                                                                                                                                                                              |              |
| 37 |                                                                     |     |                                                                                                                                                                                                                                                                                                                                                                                                              |              |
| 38 |                                                                     |     |                                                                                                                                                                                                                                                                                                                                                                                                              |              |
| 39 |                                                                     |     |                                                                                                                                                                                                                                                                                                                                                                                                              |              |
| 40 |                                                                     | 18b | Plans to promote participant retention and complete follow-up, including list of any outcome data to be collected for participants who discontinue or deviate from intervention protocols                                                                                                                                                                                                                    | <u>08-09</u> |
| 41 |                                                                     |     |                                                                                                                                                                                                                                                                                                                                                                                                              |              |
| 42 |                                                                     |     |                                                                                                                                                                                                                                                                                                                                                                                                              |              |
| 43 |                                                                     |     |                                                                                                                                                                                                                                                                                                                                                                                                              |              |
| 44 |                                                                     |     |                                                                                                                                                                                                                                                                                                                                                                                                              |              |
| 45 |                                                                     |     |                                                                                                                                                                                                                                                                                                                                                                                                              |              |
| 46 |                                                                     |     |                                                                                                                                                                                                                                                                                                                                                                                                              |              |
| 47 |                                                                     |     |                                                                                                                                                                                                                                                                                                                                                                                                              |              |

|    |                                 |     |                                                                                                                                                                                                                                                                                                                                       |           |
|----|---------------------------------|-----|---------------------------------------------------------------------------------------------------------------------------------------------------------------------------------------------------------------------------------------------------------------------------------------------------------------------------------------|-----------|
| 1  | Data management                 | 19  | Plans for data entry, coding, security, and storage, including any related processes to promote data quality (eg, double data entry; range checks for data values). Reference to where details of data management procedures can be found, if not in the protocol                                                                     | <u>14</u> |
| 2  |                                 |     |                                                                                                                                                                                                                                                                                                                                       |           |
| 3  |                                 |     |                                                                                                                                                                                                                                                                                                                                       |           |
| 4  |                                 |     |                                                                                                                                                                                                                                                                                                                                       |           |
| 5  | Statistical methods             | 20a | Statistical methods for analysing primary and secondary outcomes. Reference to where other details of the statistical analysis plan can be found, if not in the protocol                                                                                                                                                              | <u>14</u> |
| 6  |                                 |     |                                                                                                                                                                                                                                                                                                                                       |           |
| 7  |                                 |     |                                                                                                                                                                                                                                                                                                                                       |           |
| 8  |                                 | 20b | Methods for any additional analyses (eg, subgroup and adjusted analyses)                                                                                                                                                                                                                                                              | <u>NA</u> |
| 9  |                                 |     |                                                                                                                                                                                                                                                                                                                                       |           |
| 10 |                                 | 20c | Definition of analysis population relating to protocol non-adherence (eg, as randomised analysis), and any statistical methods to handle missing data (eg, multiple imputation)                                                                                                                                                       | <u>NA</u> |
| 11 |                                 |     |                                                                                                                                                                                                                                                                                                                                       |           |
| 12 |                                 |     |                                                                                                                                                                                                                                                                                                                                       |           |
| 13 |                                 |     |                                                                                                                                                                                                                                                                                                                                       |           |
| 14 |                                 |     |                                                                                                                                                                                                                                                                                                                                       |           |
| 15 | <b>Methods: Monitoring</b>      |     |                                                                                                                                                                                                                                                                                                                                       |           |
| 16 |                                 |     |                                                                                                                                                                                                                                                                                                                                       |           |
| 17 | Data monitoring                 | 21a | Composition of data monitoring committee (DMC); summary of its role and reporting structure; statement of whether it is independent from the sponsor and competing interests; and reference to where further details about its charter can be found, if not in the protocol. Alternatively, an explanation of why a DMC is not needed | <u>NA</u> |
| 18 |                                 |     |                                                                                                                                                                                                                                                                                                                                       |           |
| 19 |                                 |     |                                                                                                                                                                                                                                                                                                                                       |           |
| 20 |                                 |     |                                                                                                                                                                                                                                                                                                                                       |           |
| 21 |                                 |     |                                                                                                                                                                                                                                                                                                                                       |           |
| 22 |                                 | 21b | Description of any interim analyses and stopping guidelines, including who will have access to these interim results and make the final decision to terminate the trial                                                                                                                                                               | <u>NA</u> |
| 23 |                                 |     |                                                                                                                                                                                                                                                                                                                                       |           |
| 24 |                                 |     |                                                                                                                                                                                                                                                                                                                                       |           |
| 25 |                                 |     |                                                                                                                                                                                                                                                                                                                                       |           |
| 26 | Harms                           | 22  | Plans for collecting, assessing, reporting, and managing solicited and spontaneously reported adverse events and other unintended effects of trial interventions or trial conduct                                                                                                                                                     | <u>09</u> |
| 27 |                                 |     |                                                                                                                                                                                                                                                                                                                                       |           |
| 28 |                                 |     |                                                                                                                                                                                                                                                                                                                                       |           |
| 29 | Auditing                        | 23  | Frequency and procedures for auditing trial conduct, if any, and whether the process will be independent from investigators and the sponsor                                                                                                                                                                                           | <u>NA</u> |
| 30 |                                 |     |                                                                                                                                                                                                                                                                                                                                       |           |
| 31 |                                 |     |                                                                                                                                                                                                                                                                                                                                       |           |
| 32 |                                 |     |                                                                                                                                                                                                                                                                                                                                       |           |
| 33 | <b>Ethics and dissemination</b> |     |                                                                                                                                                                                                                                                                                                                                       |           |
| 34 |                                 |     |                                                                                                                                                                                                                                                                                                                                       |           |
| 35 | Research ethics approval        | 24  | Plans for seeking research ethics committee/institutional review board (REC/IRB) approval                                                                                                                                                                                                                                             | <u>13</u> |
| 36 |                                 |     |                                                                                                                                                                                                                                                                                                                                       |           |
| 37 |                                 |     |                                                                                                                                                                                                                                                                                                                                       |           |
| 38 | Protocol amendments             | 25  | Plans for communicating important protocol modifications (eg, changes to eligibility criteria, outcomes, analyses) to relevant parties (eg, investigators, REC/IRBs, trial participants, trial registries, journals, regulators)                                                                                                      | <u>NA</u> |
| 39 |                                 |     |                                                                                                                                                                                                                                                                                                                                       |           |
| 40 |                                 |     |                                                                                                                                                                                                                                                                                                                                       |           |
| 41 |                                 |     |                                                                                                                                                                                                                                                                                                                                       |           |
| 42 |                                 |     |                                                                                                                                                                                                                                                                                                                                       |           |
| 43 |                                 |     |                                                                                                                                                                                                                                                                                                                                       |           |
| 44 |                                 |     |                                                                                                                                                                                                                                                                                                                                       |           |
| 45 |                                 |     |                                                                                                                                                                                                                                                                                                                                       |           |
| 46 |                                 |     |                                                                                                                                                                                                                                                                                                                                       |           |
| 47 |                                 |     |                                                                                                                                                                                                                                                                                                                                       |           |

|    |                               |     |                                                                                                                                                                                                                                                                                     |              |
|----|-------------------------------|-----|-------------------------------------------------------------------------------------------------------------------------------------------------------------------------------------------------------------------------------------------------------------------------------------|--------------|
| 1  | Consent or assent             | 26a | Who will obtain informed consent or assent from potential trial participants or authorised surrogates, and how (see Item 32)                                                                                                                                                        | <u>13</u>    |
| 2  |                               |     |                                                                                                                                                                                                                                                                                     |              |
| 3  |                               |     |                                                                                                                                                                                                                                                                                     |              |
| 4  |                               | 26b | Additional consent provisions for collection and use of participant data and biological specimens in ancillary studies, if applicable                                                                                                                                               | <u>NA</u>    |
| 5  |                               |     |                                                                                                                                                                                                                                                                                     |              |
| 6  |                               |     |                                                                                                                                                                                                                                                                                     |              |
| 7  | Confidentiality               | 27  | How personal information about potential and enrolled participants will be collected, shared, and maintained in order to protect confidentiality before, during, and after the trial                                                                                                | <u>13</u>    |
| 8  |                               |     |                                                                                                                                                                                                                                                                                     |              |
| 9  |                               |     |                                                                                                                                                                                                                                                                                     |              |
| 10 | Declaration of interests      | 28  | Financial and other competing interests for principal investigators for the overall trial and each study site                                                                                                                                                                       | <u>03-14</u> |
| 11 |                               |     |                                                                                                                                                                                                                                                                                     |              |
| 12 |                               |     |                                                                                                                                                                                                                                                                                     |              |
| 13 |                               |     |                                                                                                                                                                                                                                                                                     |              |
| 14 | Access to data                | 29  | Statement of who will have access to the final trial dataset, and disclosure of contractual agreements that limit such access for investigators                                                                                                                                     | <u>14</u>    |
| 15 |                               |     |                                                                                                                                                                                                                                                                                     |              |
| 16 |                               |     |                                                                                                                                                                                                                                                                                     |              |
| 17 | Ancillary and post-trial care | 30  | Provisions, if any, for ancillary and post-trial care, and for compensation to those who suffer harm from trial participation                                                                                                                                                       | <u>NA</u>    |
| 18 |                               |     |                                                                                                                                                                                                                                                                                     |              |
| 19 |                               |     |                                                                                                                                                                                                                                                                                     |              |
| 20 | Dissemination policy          | 31a | Plans for investigators and sponsor to communicate trial results to participants, healthcare professionals, the public, and other relevant groups (eg, via publication, reporting in results databases, or other data sharing arrangements), including any publication restrictions | <u>13</u>    |
| 21 |                               |     |                                                                                                                                                                                                                                                                                     |              |
| 22 |                               |     |                                                                                                                                                                                                                                                                                     |              |
| 23 |                               |     |                                                                                                                                                                                                                                                                                     |              |
| 24 |                               |     |                                                                                                                                                                                                                                                                                     |              |
| 25 |                               | 31b | Authorship eligibility guidelines and any intended use of professional writers                                                                                                                                                                                                      | <u>14</u>    |
| 26 |                               |     |                                                                                                                                                                                                                                                                                     |              |
| 27 |                               | 31c | Plans, if any, for granting public access to the full protocol, participant-level dataset, and statistical code                                                                                                                                                                     | <u>NA</u>    |
| 28 |                               |     |                                                                                                                                                                                                                                                                                     |              |
| 29 |                               |     |                                                                                                                                                                                                                                                                                     |              |
| 30 | <b>Appendices</b>             |     |                                                                                                                                                                                                                                                                                     |              |
| 31 |                               |     |                                                                                                                                                                                                                                                                                     |              |
| 32 | Informed consent materials    | 32  | Model consent form and other related documentation given to participants and authorised surrogates                                                                                                                                                                                  | <u>13</u>    |
| 33 |                               |     |                                                                                                                                                                                                                                                                                     |              |
| 34 |                               |     |                                                                                                                                                                                                                                                                                     |              |
| 35 | Biological specimens          | 33  | Plans for collection, laboratory evaluation, and storage of biological specimens for genetic or molecular analysis in the current trial and for future use in ancillary studies, if applicable                                                                                      | <u>NA</u>    |
| 36 |                               |     |                                                                                                                                                                                                                                                                                     |              |
| 37 |                               |     |                                                                                                                                                                                                                                                                                     |              |

38  
39 \*It is strongly recommended that this checklist be read in conjunction with the SPIRIT 2013 Explanation & Elaboration for important clarification on the items.  
40 Amendments to the protocol should be tracked and dated. The SPIRIT checklist is copyrighted by the SPIRIT Group under the Creative Commons  
41 "[Attribution-NonCommercial-NoDerivs 3.0 Unported](https://creativecommons.org/licenses/by-nc-nd/3.0/)" license.  
42  
43  
44
