# Supplementary material for: Protocol study for a randomised, controlled, double-blind, clinical trial involving virtual reality and anodal transcranial direct current stimulation for the improvement of upper limb motor function in children with Down syndrome
Source: PubMed Central journal article supplement — BMJ Open. 2017 Aug 11;7(8):e016260. doi: 10.1136/bmjopen-2017-016260 (PMC5629662; doi:10.1136/bmjopen-2017-016260), 2017-08-11
Supplement: bmjopen-2017-016260supp001.pdf [file bmjopen-2017-016260supp001.pdf]

## APPENDIX 1

### Termo de Consentimento para Participação em Pesquisa Clínica

Nome do Voluntário: \_\_\_\_\_

Endereço: \_\_\_\_\_

Telefone para contato: \_\_\_\_\_ Cidade: \_\_\_\_\_ CEP: \_\_\_\_\_

E mail: \_\_\_\_\_

1. As informações contidas neste prontuário foram fornecidas pela aluna Jamile Benite Palma Lopes (Mestranda da Universidade Nove de Julho), Prof<sup>a</sup>. Claudia Santos Oliveira, objetivando firmar acordo escrito mediante o qual, o voluntário da pesquisa autoriza sua participação com pleno conhecimento da natureza dos procedimentos e riscos a que se submeterá, com a capacidade de livre arbítrio e sem qualquer coação.

2. Título do Trabalho Experimental: Realidade virtual e estimulação transcraniana por corrente contínua anódica para melhora da função motora de membros superiores em crianças com síndrome de down: ensaio clínico controlado aleatorizado e duplo cego.

3. Objetivo: Examinar os efeitos da estimulação por corrente sobre o controle motor, atividade dos músculos, atividade do cérebro e independência funcional de crianças com Síndrome de Down.

4. Justificativa: acredita-se que ao aplicar a estimulação por corrente, especificamente, durante o treino motor com uso de um vídeo game, será possível, otimizar a atividade do cérebro e a melhora motora.

5. Procedimentos da Fase Experimental: Será selecionadas crianças diagnosticadas com Síndrome de Down, com capacidade de entendimento e colaboração para realização dos procedimentos envolvidos no estudo, crianças com idade entre seis e 12 anos, crianças com queixas de comprometimento Na coordenação motora dos braços. O processo de avaliação (antes, após e um mês após o treino, será realizado em três dias não consecutivos, mas na mesma semana, com período máximo de uma hora e 30 minutos por dia. A avaliação será constituída dos seguintes itens: (1) Análise de movimento dos braços durante uma tarefa: avaliado pela cinemática, eletromiografia e eletroencefalograma, a criança realizara uma tarefa com os braços e ao mesmo tempo será avaliada pelos aparelhos, sendo acompanhada pelo fisioterapeuta responsável e pelos assistentes (2) PEDI o PEDI é um questionário aplicado no formato de entrevista estruturada com um dos cuidadores da criança, que possa informar sobre seu desempenho em atividades e tarefas típicas da rotina diária. O teste é composto de três partes: a primeira avalia habilidades de repertório da criança agrupadas segundo três áreas

funcionais: autocuidado (73 itens), mobilidade (59 itens) e função social (65 itens). Cada item dessa parte é pontuado com escore 0 (zero) se a criança não é capaz de desempenhar a atividade, ou 1 (um), se a atividade fizer parte de seu repertório de habilidades. O Grupo 1 terá o movimento do braço analisado após realizar treino com o vídeo game junto com a estimulação desligada (placebo). O Grupo 2 terá o movimento do braço analisado após realizar treino com o vídeo game junto com a estimulação ligada. A estimulação por corrente é uma técnica não invasiva que será realizada colocando eletrodos de superfície conectados a um aparelho de corrente galvânica (corrente elétrica de baixa intensidade) sobre o crânio (cabeça) da criança, durante 20 minutos por 15 dias. A estimulação é indolor.

**6. Desconforto ou Risco Esperado:** Embora os procedimentos adotados no estudo sejam não-invasivos os voluntários serão submetidos a risco como por exemplo, quedas, fadiga muscular, câimbras durante o treino motor de realidade virtual. Para que estes riscos sejam minimizados ao máximo serão adotadas as seguintes medidas protetoras: A estimulação será realizada por uma fisioterapeuta com experiência na técnica. No treino de realidade virtual serão realizados por uma fisioterapeuta com experiência em treino motor que será acompanhada por ao menos um voluntário ambos permanecerão posicionados do lado do paciente por todo o treino.

**7. Informações:** o voluntário tem garantia que receberá respostas a qualquer pergunta ou esclarecimento de qualquer dúvida quanto aos procedimentos, riscos benefícios e outros assuntos relacionados com pesquisa. Também os pesquisadores supracitados assumem o compromisso de proporcionar informação atualizada obtida durante o estudo, ainda que esta possa afetar a vontade do indivíduo em continuar participando.

**8. Retirada do Consentimento:** o voluntário tem a liberdade de retirar seu consentimento a qualquer momento e deixar de participar do estudo, sem que isto lhe traga qualquer prejuízo.

**9. Aspecto Legal:** Elaborados de acordo com as diretrizes e normas regulamentadas de pesquisa envolvendo seres humanos atendendo à Resolução nº. 466/12 do Conselho Nacional de Saúde do Ministério de Saúde – Brasília – DF.

**10. Garantia de Sigilo:** Os pesquisadores asseguram a privacidade dos voluntários quanto aos dados confidenciais envolvidos na pesquisa.

**11. Formas de ressarcimento das despesas decorrentes da participação na pesquisa:** Se necessário, será dado aos pesquisados auxílio transporte de ida e volta ao local da pesquisa. Não será dada ao pesquisado qualquer tipo de remuneração e auxílio de custo pela participação na pesquisa. Pelo curto tempo das avaliações e intervenções não haverá fornecimento de alimentação ao pesquisado.

12. Local da Pesquisa: A pesquisa será desenvolvida no Laboratório Integrado de Análise do Movimento Humano - LIAMH e Núcleo de Apoio a Pesquisa na Análise do Movimento - NAPAM, Universidade Nove de Julho UNINOVE, localizada na rua Vergueiro, no 235/249, 2º subsolo, Vergueiro, São Paulo - SP.

13. Comitê de Ética em Pesquisa (CEP) é um colegiado interdisciplinar e independente, que deve existir nas instituições que realizam pesquisas envolvendo seres humanos no Brasil, criado para defender os interesses dos participantes de pesquisas em sua integridade e dignidade e para contribuir no desenvolvimento das pesquisas dentro dos padrões éticos (Normas e Diretrizes Regulamentadoras da Pesquisa envolvendo Seres Humanos – Res. CNS nº 466/12). O Comitê de Ética é responsável pela avaliação e acompanhamento dos protocolos de pesquisa no que corresponde aos aspectos éticos.

**Endereço do Comitê de Ética da Uninove: Rua. Vergueiro nº 235/249 – 3º subsolo - Liberdade – São Paulo – SP CEP. 01504-001 Fone: 3385-9197 . comitedeetica@uninove.br**

14. Nome Completo e telefones dos pesquisadores para contato: Orientadora: Claudia Santos Oliveira (11 3665 9344) e aluno de pós graduação: Jamile Benite Palma Lopes (11) 975123549.

15. Eventuais intercorrências que vierem a surgir no decorrer da pesquisa poderão ser discutidas pelos meios próprios.

16. Consentimento Pós-Informação:

Eu, \_\_\_\_\_, após leitura e compreensão deste termo de informação e consentimento, entendo que minha participação é voluntária, e que posso sair a qualquer momento do estudo, sem prejuízo algum. Confirmando que recebi cópia deste termo de consentimento, e autorizo a execução do trabalho de pesquisa e a divulgação dos dados obtidos neste estudo no meio científico.

\* Não assine este termo se ainda tiver alguma dúvida a

respeito. São Paulo, de de 2016.

Nome (por extenso) do pesquisado:

\_\_\_\_\_  
Assinatura do pesquisado:

Nome (por extenso) do pesquisado:

\_\_\_\_\_  
Assinatura do pesquisado:
