# Supplementary material for: Protocol study for a randomised, controlled, double-blind, clinical trial involving virtual reality and anodal transcranial direct current stimulation for the improvement of upper limb motor function in children with Down syndrome
Source: PubMed Central journal article supplement — BMJ Open. 2017 Aug 11;7(8):e016260. doi: 10.1136/bmjopen-2017-016260 (PMC5629662; doi:10.1136/bmjopen-2017-016260), 2017-08-11
Supplement: bmjopen-2017-016260supp002.pdf [file bmjopen-2017-016260supp002.pdf]

## APPENDIX 2

### Approval of the Ethics Committee

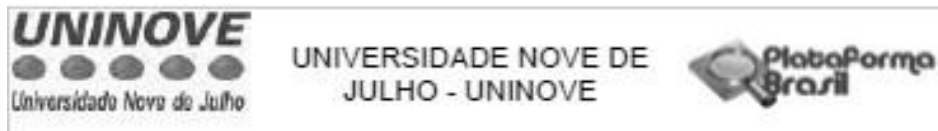

#### PARECER CONSUBSTANCIADO DO CEP

##### DADOS DO PROJETO DE PESQUISA

**Título da Pesquisa:** REALIDADE VIRTUAL E ESTIMULAÇÃO TRANSCRANIANA POR CORRENTE CONTÍNUA PARA MELHORA DA FUNÇÃO MOTORA DE MEMBROS SUPERIORES EM CRIANÇAS COM SÍNDROME DE DOWN: ENSAIO CLÍNICO CONTROLADO ALEATORIZADO E DUPLO CEGO

**Pesquisador:** Jamile Benite Palma Lopes

**Área Temática:**

**Versão:** 1

**CAAE:** 55196516.0.0000.5511

**Instituição Proponente:** ASSOCIAÇÃO EDUCACIONAL NOVE DE JULHO

**Patrocinador Principal:** Financiamento Próprio

##### DADOS DO PARECER

**Número do Parecer:** 1.517.470

##### Apresentação do Projeto:

O projeto chama a atenção para as dificuldades motoras apresentadas por crianças com síndrome de down, e sugere uma intervenção que possibilite uma melhora no controle motor dessa população.

##### Objetivo da Pesquisa:

Verificar os efeitos da estimulação transcraniana por corrente contínua (tDCS) associado a um treino neuromotor em membro superior com realidade virtual sobre a atividade cerebral e controle motor em crianças com Síndrome de Down (SD).

##### Avaliação dos Riscos e Benefícios:

Embora os procedimentos adotados no estudo sejam não-invasivos os voluntários serão submetidos a risco como por exemplo, quedas, fadiga muscular, câimbras durante o treino motor de realidade virtual. Para que estes riscos sejam minimizados ao máximo serão adotadas as seguintes medidas protetoras: A estimulação transcraniana será realizada por uma fisioterapeuta com experiência na técnica. No treino de realidade virtual serão realizados por uma fisioterapeuta com experiência em treino motor que será acompanhada por ao menos um voluntário ambos

**Endereço:** VERGUEIRO nº 235/249  
**Bairro:** LIBERDADE  
**UF:** SP      **Município:** SAO PAULO      **CEP:** 01.504-001  
**Telefone:** (11)3385-0197      **E-mail:** comitedetica@uninove.br

Continuação do Parecer: 1.517.470

permanecerão posicionados do lado do paciente por todo o treino.

**Comentários e Considerações sobre a Pesquisa:**

O projeto apresenta as características éticas necessárias para realização da pesquisa.

**Considerações sobre os Termos de apresentação obrigatória:**

Foram apresentados os termos exigidos para aprovação da pesquisa.

Considerando que tratam-se de crianças com Síndrome de Down, não é necessário o TCLE específico para menores.

**Recomendações:**

O TCLE, embora apresente os aspectos exigidos, ele deve ser reescrito, uma vez que se encontra com uma linguagem estritamente técnica sobre os procedimentos que serão realizados na pesquisas, assim como constitui-se num documento muito longo (com 6 páginas).

**Conclusões ou Pendências e Lista de Inadequações:**

Recomenda-se reescrever o TCLE, adequando a linguagem (mais simples e acessível ao responsável pela criança participante)

Resumir as informações tomando o TCLE mais simplificado e objetivo.

Este parecer foi elaborado baseado nos documentos abaixo relacionados:

| Tipo Documento                                            | Arquivo                                      | Postagem               | Autor                     | Situação |
|-----------------------------------------------------------|----------------------------------------------|------------------------|---------------------------|----------|
| Informações Básicas do Projeto                            | PE_INFORMAÇÕES_BASICAS_DO_PROJETO_693482.pdf | 12/04/2016<br>15:41:42 |                           | Aceito   |
| Folha de Rosto                                            | DOC120416.pdf                                | 12/04/2016<br>15:40:49 | Jamile Benite Palma Lopes | Aceito   |
| Projeto Detalhado / Brochura Investigador                 | projetofinal.pdf                             | 06/04/2016<br>16:57:04 | Jamile Benite Palma Lopes | Aceito   |
| TCLE / Termos de Assentimento / Justificativa de Ausência | Termo.pdf                                    | 06/04/2016<br>16:46:17 | Jamile Benite Palma Lopes | Aceito   |
| Cronograma                                                | cronograma.pdf                               | 06/04/2016<br>16:45:48 | Jamile Benite Palma Lopes | Aceito   |

**Situação do Parecer:**

Pendente

**Necessita Apreciação da CONEP:**

Endereço: VERGUEIRO nº 235/240  
Bairro: LIBERDADE CEP: 01.504-001  
UF: SP Município: SAO PAULO  
Telefone: (11)3385-0197 E-mail: comitedeetica@uninove.br

Continuação do Parecer: 1.517.470

Não

SAO PAULO, 27 de Abril de 2016

Assinado por:  
Stella Regina Zamuner  
(Coordenador)
